RESEARCH ARTICLE

# A 12,800-year-old layer with cometary dust, microspherules, and platinum anomaly recorded in multiple cores from Baffin Bay

Christopher R. Moore<sup>1,2\*</sup>, Vladimir A. Tselmovich<sup>3</sup>, Malcolm A. LeCompte<sup>4</sup>, Allen West<sup>5</sup>, Stephen J. Culver<sup>6</sup>, David J. Mallinson<sup>6</sup>, Mohammed Baalousha<sup>7</sup>, James P. Kennett<sup>8</sup>, William M. Napier<sup>9</sup>, Michael Bizimis<sup>10</sup>, Victor Adedeji<sup>11</sup>, Seth R. Sutton<sup>12</sup>, Gunther Kletetschka<sup>13,14</sup>, Kurt A. Langworthy<sup>15</sup>, Jesus P. Perez<sup>16</sup>, Timothy Witwer<sup>5</sup>, Marc D. Young<sup>17</sup>, Mahbub Alam<sup>7</sup>, Jordan Jeffreys<sup>18</sup>, Richard C. Greenwood<sup>19</sup>, James A. Malley<sup>19</sup>

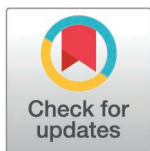

## OPEN ACCESS

**Citation:** Moore CR, Tselmovich VA, LeCompte MA, West A, Culver SJ, Mallinson DJ, et al. (2025) A 12,800-year-old layer with cometary dust, microspherules, and platinum anomaly recorded in multiple cores from Baffin Bay. PLoS One 20(8): e0328347. <https://doi.org/10.1371/journal.pone.0328347>

**Editor:** Przemysław Mroczek, Maria Curie-Skłodowska University: Uniwersytet Marii Curie-Skłodowskiej, POLAND

**Received:** January 25, 2025

**Accepted:** June 27, 2025

**Published:** August 6, 2025

**Copyright:** © 2025 Moore et al. This is an open access article distributed under the terms of the [Creative Commons Attribution License](https://creativecommons.org/licenses/by/4.0/), which permits unrestricted use, distribution, and reproduction in any medium, provided the original author and source are credited.

**Data availability statement:** All data underlying the findings are fully available without restriction. Data are provided within the manuscript and its Supporting Information files, and have been deposited in the Zenodo

**1** South Carolina Institute for Archaeology and Anthropology, University of South Carolina, Columbia, South Carolina, United States of America, **2** South Carolina Department of Natural Resources, Heritage Trust Program; Land, Water, and Conservation Division, Columbia, South Carolina, United States of America, **3** Borok Geophysical Observatory of Schmidt Institute of Physics of the Earth of the Russian Academy of Sciences, Russian Federation, **4** Center of Excellence in Remote Sensing Education and Research, Elizabeth City State University, Elizabeth City, North Carolina, United States of America, **5** Comet Research Group, Prescott, Arizona, United States of America, **6** Department of Earth, Environment and Planning, East Carolina University, Greenville, North Carolina, United States of America, **7** Center for Environmental Nanoscience and Risk (CENR), Department of Environmental Health Sciences, Arnold School of Public Health, University of South Carolina, Columbia, United States of America, **8** Department of Earth Science and Marine Science Institute, University of California Santa Barbara, Santa Barbara, California, United States of America, **9** Armagh Observatory and Planetarium, College Hill, Armagh, Northern Ireland, **10** School of Earth, Ocean and Environment, University of South Carolina, Columbia, South Carolina, United States of America, **11** Department of Natural Sciences, Elizabeth City State University, Elizabeth City, North Carolina, United States of America, **12** Department of Geoscience, University of Wisconsin – Madison, Madison, Wisconsin, United States of America, **13** Geophysical Institute, University of Alaska Fairbanks, Fairbanks, Alaska, United States of America, **14** Institute of Hydrogeology, Engineering Geology and Applied Geophysics, Charles University, Prague, Czechia, **15** Center for Advanced Materials Characterization in Oregon, University of Oregon, Eugene, Oregon, United States of America, **16** Electron Microscopy and Surface Analysis Lab, Nanofab, University of Utah, Salt Lake City, Utah, United States of America, **17** College of Humanities, Arts and Social Sciences, Flinders University, South Australia, **18** School of Earth, Ocean, and Environment, University of South Carolina, Columbia, South Carolina, United States of America, **19** Planetary and Space Sciences, The Open University, Milton Keynes, United Kingdom

\* [moorecr@mailbox.sc.edu](mailto:moorecr@mailbox.sc.edu)

## Abstract

The Younger Dryas Impact Hypothesis (YDIH) posits that ~12,800 years ago Earth encountered the debris stream of a disintegrating comet, triggering hemisphere-wide airbursts, atmospheric dust loading, and the deposition of a distinctive suite of extraterrestrial (ET) impact proxies at the Younger Dryas Boundary (YDB). Until now, evidence supporting this hypothesis has come only from terrestrial sediment and ice-core records. Here we report the first discovery of similar impact-related proxies in ocean sediments from four marine cores in Baffin Bay that span the YDB layer at water depths of 0.5–2.4 km, minimizing the potential for modern contamination. Using scanning electron microscopy with energy-dispersive spectroscopy (SEM-EDS) and

public repository at: <https://zenodo.org/records/14681287>.

**Funding:** Funding. This work made use of the University of Utah USTAR shared facilities supported, in part, by the MRSEC Program of the NSF under Award #DMR-1121252. G.K. appreciates the support from the Czech Science Foundation (Grant 23-06075S). We also thank the thousands of donors and members of the Comet Research Group (Grant 24-01) who have been crucial in making this research possible. In particular, we thank Eugene Zhong, who provided substantial gifts supporting this research to the University of South Carolina (C.R.M.) and the University of California, Santa Barbara (J.P.K.). V.A.T.'s research was carried out within the framework of the Borok Geophysical Observatory, Schmidt Institute of Physics of the Earth, Russian Academy of Sciences, state task nos. FMWU-2022-0026. The funders had no role in study design, data collection and analysis, decision to publish, or the preparation of the manuscript.

**Competing interests:** The Comet Research Group (CRG), a 501(C)(3) nonprofit charitable organization, provided research funding. J.P.K., M.A.L., C.R.M., and A.W. volunteer their time as co-founders and directors of CRG. No co-author receives a salary, compensation, stock, or any other financial benefit from CRG, except for tax deductions for CRG donations by co-authors A.W., M.A.L., and T.W. All co-authors may receive reimbursements from their respective organizations for attending symposia on the research presented in this paper. A.W. is a co-author of a book related to the YDIH; he donates all proceeds to the non-profit Comet Research Group. The authors declare no other competing interests. This does not alter our adherence to PLOS ONE policies on sharing data and materials.

laser ablation ICP-MS, we detect synchronous abundance peaks of metallic debris geochemically consistent with cometary dust, co-occurring with iron- and silica-rich microspherules (4–163  $\mu\text{m}$ ) that are predominantly of terrestrial origin with minor (<2 wt%) ET contributions. These microspherules were likely formed by low-altitude touchdown airbursts and surface impacts of comet fragments and were widely dispersed. In addition, single-particle ICP-TOF-MS analysis reveals nanoparticles (<1  $\mu\text{m}$ ) enriched in platinum, iridium, nickel, and cobalt. Similar platinum-group element anomalies at the YDB have been documented at dozens of sites worldwide, strongly suggesting an ET source. Collectively, these findings provide robust support for the YDIH. The impact event likely triggered massive meltwater flooding, iceberg calving, and a temporary shutdown of thermohaline circulation, contributing to abrupt Younger Dryas cooling. Our identification of a YDB impact layer in deep marine sediments underscores the potential of oceanic records to broaden our understanding of this catastrophic event and its climatological impacts.

## Introduction

### The younger dryas impact hypothesis (YDIH)

The YDIH posits that ~12,800 years ago, Earth entered the debris stream of a large disintegrating comet [1]. This impactor is hypothesized to have undergone multiple disintegrations during the last 20,000–35,000 years, resulting in the formation of the Taurid Complex, which includes Comet Encke and approximately 90 objects with diameters up to 5 km [2–7]. During this encounter, fragments from the comet are proposed to have collided with Earth, depositing an assemblage of impact proxies into the atmosphere and possibly creating multiple small, shallow, temporary craters [8–12].

### Scope of this study

If such an event occurred at the Younger Dryas Boundary (YDB), there should be evidence of a widespread YDB peak in cometary dust, also known as “cosmic dust,” “cometary dust particles (CDPs),” and “interplanetary dust particles.” Additionally, if there were low-altitude airbursts and surface impacts during such an encounter, there should also be impact-related microspherules (also known as microtektites and microkrystites) [13,14], mainly produced from terrestrial material with a small extra-terrestrial (ET) component (<~2 wt%) [15–18]. This layer should also have elevated platinum group elements (PGEs) and other elements, such as cobalt, chromium, and nickel, commonly found in comets and asteroids.

To test the hypothesis of such a cosmic impact event at the Younger Dryas onset, we examined YDB sequences in four marine sediment cores from Baffin Bay, which were identified in earlier studies to include the YD interval [19,20]. Sediment samples from within, above, and below the YDB layer were analyzed for Fe- and Si-rich microspherules containing minerals formed at high temperatures, elevated PGE and

REE concentrations, and potential cometary dust particles (CDPs). The sediments were then analyzed for nanoparticles using a novel application of single-particle inductively coupled plasma time-of-flight mass spectrometry (SP-ICP-TOF-MS). Additionally, microspherule candidates were examined using scanning electron microscopy (SEM) and energy dispersive spectroscopy (EDS), as well as laser ablation inductively coupled plasma mass spectrometry (LA-ICP-MS).

## Geologic setting

Baffin Bay is a narrow ocean strait between Greenland and Baffin Island that provides a restricted connection between the Arctic and North Atlantic Oceans. It extends ~1000 km from Jones Sound in northern Baffin Bay to Home Bay to the south [19,20]. Water depths in Baffin Bay are up to ~2400 m. The western continental margin of Baffin Bay features a narrow and gently sloping continental shelf, which transitions to a steep continental slope [20].

## Cometary dust particles (CDPs)

Metallic micro-particles of various shapes have been found in peaty deposits [21–23], Antarctic ice [24], oceanic sediments [25], terrestrial sedimentary rocks [26,27], and during research missions into Earth's stratosphere [28]. Most of these particles are attributed to a constant influx of interplanetary dust that falls to Earth at an estimated rate of  $\sim 5.2 \times 10^3$  metric tons/year [29], although that rate is variable.

Tselmovich *et al.* [23] note that “*the origin of cosmic dust can be quite diverse, including the remains of disintegrated comets, asteroids, and particles of matter ejected by the Sun.*” Flynn *et al.* [30] also concluded that dust associated with active comets and objects in the asteroid belt are both likely sources of cosmic dust. According to Nesvorný *et al.* [31], up to 85% of this dust is cometary in origin, and most unmelted cosmic dust originates from Jupiter-family comets, with a smaller portion coming from the asteroid belt [29]. Other studies estimate that comets supply a significant percentage of dust particles that reach Earth, with various studies suggesting a range of 30–90% [32–34], with the rest coming from asteroids. Schmidt [35] also observed that “*meteoric dust is probably related to ablation of cometary meteors in the Earth's atmosphere.*” He suggested that high-velocity entry of this dust into Earth's atmosphere would evaporate ice and release metallic particles with amorphous coatings. This hypothesis is supported by Parkin and Hunter [36], who found that metallic flake abundances seemed to be related to “meteor showers.” However, it is widely accepted today that “meteor showers” result not only from meteors but also from the influx of material from cometary trails.

Recent studies by Tselmovich *et al.* [21–23,37] and Sungatullin *et al.* [26,27,38,39] have documented a variety of melted and unmelted metallic dust particles (MDPs) commonly present in Holocene peats, interpreted as indicators of the flux of cometary dust. Large peaks in these MDPs are also observed within sedimentary layers associated with potential cometary airburst/impact events. Electron microscope and microprobe analyses of these MDPs show that they typically consist of native iron (Fe), low-oxygen Fe (wüstite), and native nickel (Ni), along with metal alloys such as FeNi, FeCr, and FeCrNi, among others. These particles exhibit a variety of distinct morphologies, including flaky or platy forms, needle- or string-like shapes, and spirals with twisted, folded, laminated, and deformed surface textures with trenches or furrows. These morphologies may originate when cometary dust passes through the atmosphere and undergoes differential melting that causes the separation of components (e.g., Fe, Ni, Cr, and Si). These processes lead to the formation of flat metallic “flakes,” such as elongated Fe or FeNi particles that are prone to curving or twisting during atmospheric passage [27,40]. In addition, some particles show partially melted and folded edges that are inconsistent with oceanic basalts or mantle xenoliths and, instead, are consistent with ET material that entered the atmosphere at high velocity, resulting in partial melting [41]. Many native Fe and native Ni CDPs are proposed to have formed from the differentiation of Fe and Ni from silicate, which occurs via complete or partial melting during atmospheric passage and/or during explosive detonations during cometary airbursts/impacts [27]. Tselmovich [23] states that magnetite microspherules and flake-like particles of oxygen-depleted iron, nickel, and intermetallic compounds found in sedimentary rocks are often of cometary origin.

## Microspherules

Unlike cometary microspherules, impact-related ones form when rock vaporized by meteoritic impacts or airbursts condenses into glassy or crystalline spherical particles and are then deposited as proximal and distal ejecta [13]. Glassy microspherules lacking crystals are called microtektites, while other microspherules form through vapor condensation. The surfaces of these microspherules often exhibit a dendritic or segmented soccer ball pattern due to Fe crystallization of melted magnetite and are called microkrystites [13,14]. Both silica-rich microtektites and Fe-rich microkrystites containing high-temperature melted minerals have been reported in the YDB layer at numerous sites from various depositional environments and depths on six continents [1,8,9,42,43]. Collectively, we refer to both types as impact microspherules, shortened to “microspherules” in this contribution.

## Study sites

Sediment samples were collected from four piston cores curated at the National Marine Geoscience Collection at the Bedford Institute of Oceanography in Dartmouth, Nova Scotia (SI, Fig S1, [https://zenodo.org/uploads/15330698]). These marine cores were selected based on their previously published radiocarbon dates and/or stratigraphic changes indicating the YD onset [19,20]. These are the first marine sedimentary cores to be studied in search of the YDB cosmic impact layer. We studied four piston cores sequences (Cores 83023–052, 2012039–064, 2012039–077, and 2012039–67) spanning a distance of ~1000 km from a cross-shelf trough off the mouth of Jones Sound, along the northeast Baffin Slope, in the Baffin Bay Basin, and to offshore of Home Bay, just north of Davis Strait (Fig 1 and Table 1). Cores were sampled in water depths ranging from ~500 to nearly 2,400 meters. All of the metadata for these cores are available via the Expedition Database (ED) https://ed.marine-geo.canada.ca/cruises\_e.php.

See higher resolution Bathymetry Data for Core 83029–52 in SI, Fig S2 (https://zenodo.org/uploads/15330698).

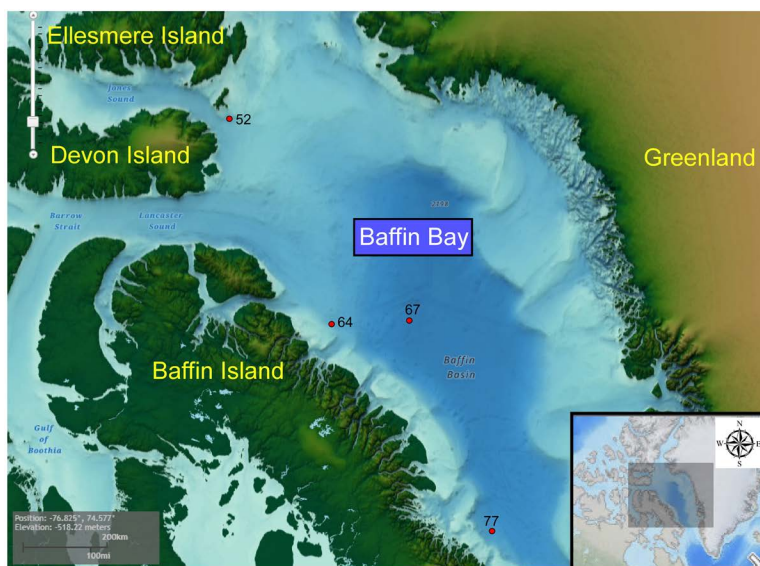

**Fig 1. (a) Map of northeast Canada and Greenland showing the location of Baffin Bay and core 83029–052 (small red box in panel a), and (b) locations of cores 2013029–064, 2013029–77, and 2008029–67 sampled for this study (small red boxes).** The map was created using the NCEI Bathymetric Data Viewer and is public domain. (https://www.ncei.noaa.gov/maps/bathymetry/).

<https://doi.org/10.1371/journal.pone.0328347.g001>



**Table 1. Sediment cores used in this study.**

| Expedition number | Core number | Core Type        | Latitude (N) | Longitude (W) | Water depth (m) | Core length (cm) |
|-------------------|-------------|------------------|--------------|---------------|-----------------|------------------|
| 2013029           | 64          | Piston-ACG Large | 72.426113    | -72.769305    | 875             | 713              |
| 2008029           | 67          | Piston-ACG Large | 72.434431    | -67.877178    | 2357            | 519              |
| 83023             | 52          | Piston-Benthos   | 75.58667     | -78.69167     | 512             | 875              |
| 2013029           | 77          | Piston-ACG Large | 68.308682    | -63.794663    | 1153            | 649.5            |

<https://doi.org/10.1371/journal.pone.0328347.t001>

## Radiocarbon dating and bayesian modeling

Core sections for radiocarbon dating were chosen based on previous chronometric dating that suggested the sampled interval included the YD boundary. For this study, we conducted accelerator mass spectrometry (AMS) radiocarbon dating on foraminifera (see SI, “Foraminifera: Radiocarbon Dating and Environmental Setting”). These age estimates and previously published radiocarbon ages of foraminifera and a molluscan shell were used to develop a Bayesian geochronology for sampled sections of each of the four cores (Fig 2; SI, Figs S3-S6 and SI, Tables S1-S5, [<https://zenodo.org/uploads/15330698>]). Reservoir corrections ( $\Delta R$ ) were applied to radiocarbon dates during calibration in OxCal using values for Baffin Bay from Pearce *et al.* [45]: Zone 4 for Core 52,  $\Delta R = +71$  y; Zone 3 for Cores 64 and 67,  $\Delta R = +218$  y; and Zone 3/2 border for Core 77,  $\Delta R = +103$  (avg of +218 and -12). McNeely *et al.* [46] also provided reservoir corrections for Baffin Bay, but they were based on a previous IntCal calibration curve. Although the corrections were similar, with a range of  $\Delta R = +220$  to +50, we used the more recent values from Pearce *et al.* [45]. The modeling indicates that all four Baffin Bay cores contain sediments deposited at the onset of the Younger Dryas episode (12,835–12,735 cal. BP) [44].

Throughout this manuscript and Supporting Information, calibrated ages are sometimes shown, and Bayesian modeled ages are shown at other times. They are not always the same, usually because of radiocarbon reversals due to redeposition and bioturbation. In case of a discrepancy, the Bayesian ages are preferred.

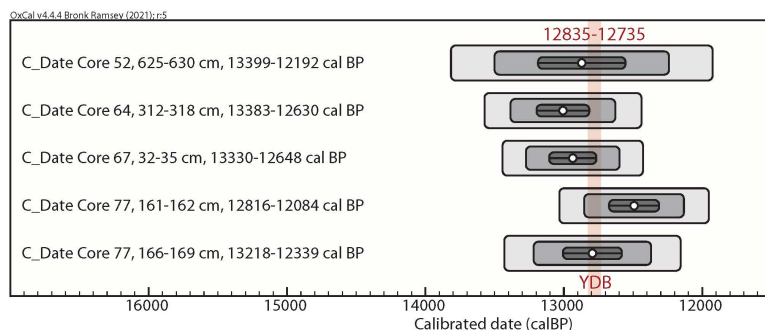

**Fig 2. Bayesian radiocarbon analyses of cores.** Bayesian analyses were generated to produce age-depth models for the four cores (see SI, Figs S3-S6, and SI, Tables S2-S5, [<https://zenodo.org/uploads/15330698>]). We also generated calibrated ages for each core's YDB layer, which contains abundance peaks in microspherules, MDPs, and PGE-enriched nanoparticles. The results here list the core, depth interval of the YDB in each core, and calibrated ages (cal BP) at 95.4% Confidence Intervals (CI). The Bayesian interpolated mean age is displayed as a white dot. Confidence Intervals (CI) of 68.3% CI are shown as dark gray horizontal bars, 95.4% CI as medium gray, and 99.7% CI as light gray. The previously published YDB age range of 12,835–12,735 cal BP [44] is shown as a vertical red bar. (a) **Core 52**, for the 625-630-cm interval, the 68.3%, 95.4%, and 99.7% CI bars overlap the YDB age range. (b) **Core 64**, for the 312-318-cm interval, the 68.3%, 95.4%, and 99.7% CI bars overlap the YDB age range. (c) **Core 67**, for the 32-35-cm interval, the 68.3%, 95.4%, and 99.7% CI bars overlap the YDB age range. (d) **Core 77**, for the 161-162-cm interval, the 95.4% and 99.7% CI bars overlap the YDB age range, suggesting that this sample may slightly post-date the YDB and the proxies have been redeposited upward. Alternatively, for the 171-173-cm sample, which was not analyzed for proxies, the 68.3%, 95.4%, and 99.7% CI bars overlap the YDB age range, suggesting that this may be the YDB layer. OxCal version 4.4.4 was used with the IntCal20 Marine calibration curve, and reservoir corrections were applied to all radiocarbon dates.

<https://doi.org/10.1371/journal.pone.0328347.g002>

## Results

The Baffin Bay cores exhibit distinct, anomalous abundance peaks in unusual materials in the Bayesian-modeled YDB layer (Figs 3 and 4). These include peaks in Fe-rich and silica-rich microspherules (~163–4 μm in diameter) with high-temperature minerals, MDPs, meltglass, and platinum group elements [PGEs]). Microspherule and MDP abundance peaks and examples of meltglass occur in the YDB-dated layers of each core, typically just below the bottom of an ice-rafted detritus (IRD) layer and falling off rapidly in samples above and below the YDB (Fig 4).

### Microspherules

Fe-rich and silica-rich microspherules peak in the YDB-dated core samples and feature evidence for high-temperature minerals, secondary spherule-on-spherule impacts, bubbles/vesicles, dendritic surface textures on Fe-rich microspherules, and aerodynamic shapes indicating high-velocity travel (Fig 5 and SI, Table S6, <https://zenodo.org/uploads/15330698>). Fe-rich microspherules exhibit blebs of a low-oxygen metal (e.g., Fig 5d) that is transitional between chromite ( $\text{FeCr}_2\text{O}_4$ ; melting point = 1,850–2,200°C) and Cr-magnetite ( $\text{Fe}^{2+}(\text{Fe}_{1-n}\text{Cr}_n)_2\text{O}_4$ ; melting point = 1,583–1,587°C), both found in some chondritic and achondritic meteorites, as well as in impact-related materials; the microspherules also contain iron phosphide (FeP; melting point = 1,370°C) (Figs 5k, 5m). Some silica-rich microspherules also exhibit numerous blebs of iron-silicide (FeSi; melting point = 1,410°C) and iron-sulfide (FeS; melting point = 1,184°C) (e.g., Figs 5e, 5h). These inclusions indicate formation at high temperatures in a reducing environment with limited oxygen, consistent with impact events [8,9,42,47–49]. See SI, Figs S10–S58 (Core 52); S73–84 (Core 64); S87–98 (Core 67); S88–S107 (Core 77) for EDS analysis of microspherules and metal inclusions (<https://zenodo.org/uploads/15330698>).

### Meltglass

Fragments of meltglass and melted grains were identified in Cores 64 and 52. These included various forms, including a melted cluster consisting of aluminosilicate and Fe-rich microspherules; a quartz grain that was either melted ( $\geq 1715^\circ\text{C}$ ) or boiled ( $\geq 2200^\circ\text{C}$ ); Fe- and Cr-rich aluminosilicate meltglass; potassium-enriched aluminosilicate meltglass; and Ti-rich aluminosilicate meltglass (Fig 6).

### Metallic dust particles (MDPs)

These particles were analyzed using both SEM/EDS and LA-ICP-MS. MDPs range from ~20–150 μm in diameter. Baffin Bay MDPs are typically composed of native iron (Fe), native nickel (Ni), oxygen-depleted iron (low-O<sub>2</sub> Fe), chromite ( $\text{FeCr}_2\text{O}_4$ ), and chromite enriched with Ni (FeCrNi). These MDPs include flat, “flake-like,” or elongated forms that often appear stretched, deformed, folded, and melted along the edges (Fig 7).

### Melt splatter

Blebs of splattered chromite ( $\text{FeCr}_2\text{O}_4$ ), FeCrNi, FeO, and tungsten (W), as labeled on each panel, were observed fused on rounded detrital quartz and magnetite from YDB-dated layers in the Baffin Bay cores (SI, Figs S103–S116 [Core 52]; S159–S167 [Core 64]; S210–S222 [Core 67]; and S241–253 [Core 77] [<https://zenodo.org/uploads/15330698>]). These metallic blebs are primarily composed of native Ni, FeCrNi, and chromite, and they morphologically resemble melted splatter on quartz, ilmenite, and garnet grains from a South Carolina site described as cometary dust particles (CDPs) by Tselmovich *et al.* [37] (Fig 8).

### Nanoparticle analysis

Nanoparticles (<1 micron) in bulk sediment were analyzed using single particle inductively coupled plasma time-of-flight mass spectrometry (SP-ICP-TOF-MS). Measurements of nanoparticles from Cores 64 and 67 were from YDB-dated

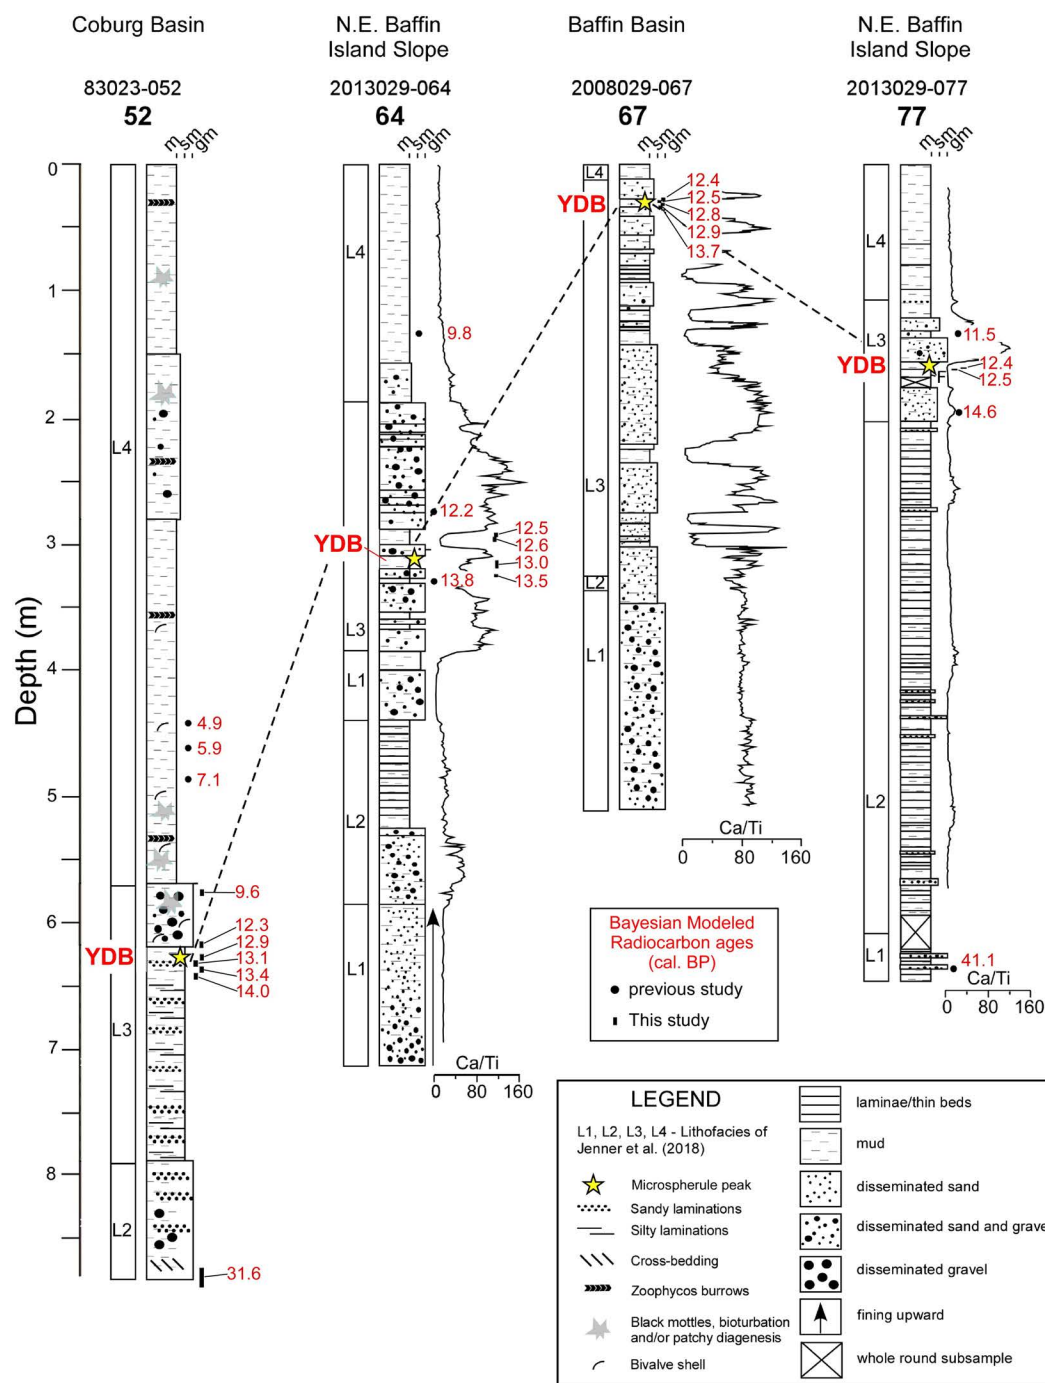

**Fig 3. Comparison of Baffin Bay core lithofacies, Bayesian-modeled calibrated radiocarbon ages (SI, Tables S2-S5), and microspherule peaks (SI, Table S6) for Core 83023-052; and lithofacies, pXRF Ca/Ti ratios, and microspherule peaks (SI, Table S6) for Cores 2013029-064, 2013029-067, and 2013029-077** (<https://zenodo.org/uploads/15330698>). The core 52 log is adapted from the Geological Survey of Canada marine core archives. Core logs for Cores 64, 67, and 77 are adapted from Fig 4 in Jenner *et al.* 2018 [19]. Notes: <sup>1</sup>Bayesian- modeled calibrated radiocarbon dates from Jenner *et al.* [19] and <sup>2</sup>Bayesian-modeled calibrated radiocarbon dates (this study). Red boxes (a-d) are core sections examined for impact proxies, as shown in Fig 4. Figure generated from data in Jenner *et al.* [19].

<https://doi.org/10.1371/journal.pone.0328347.g003>

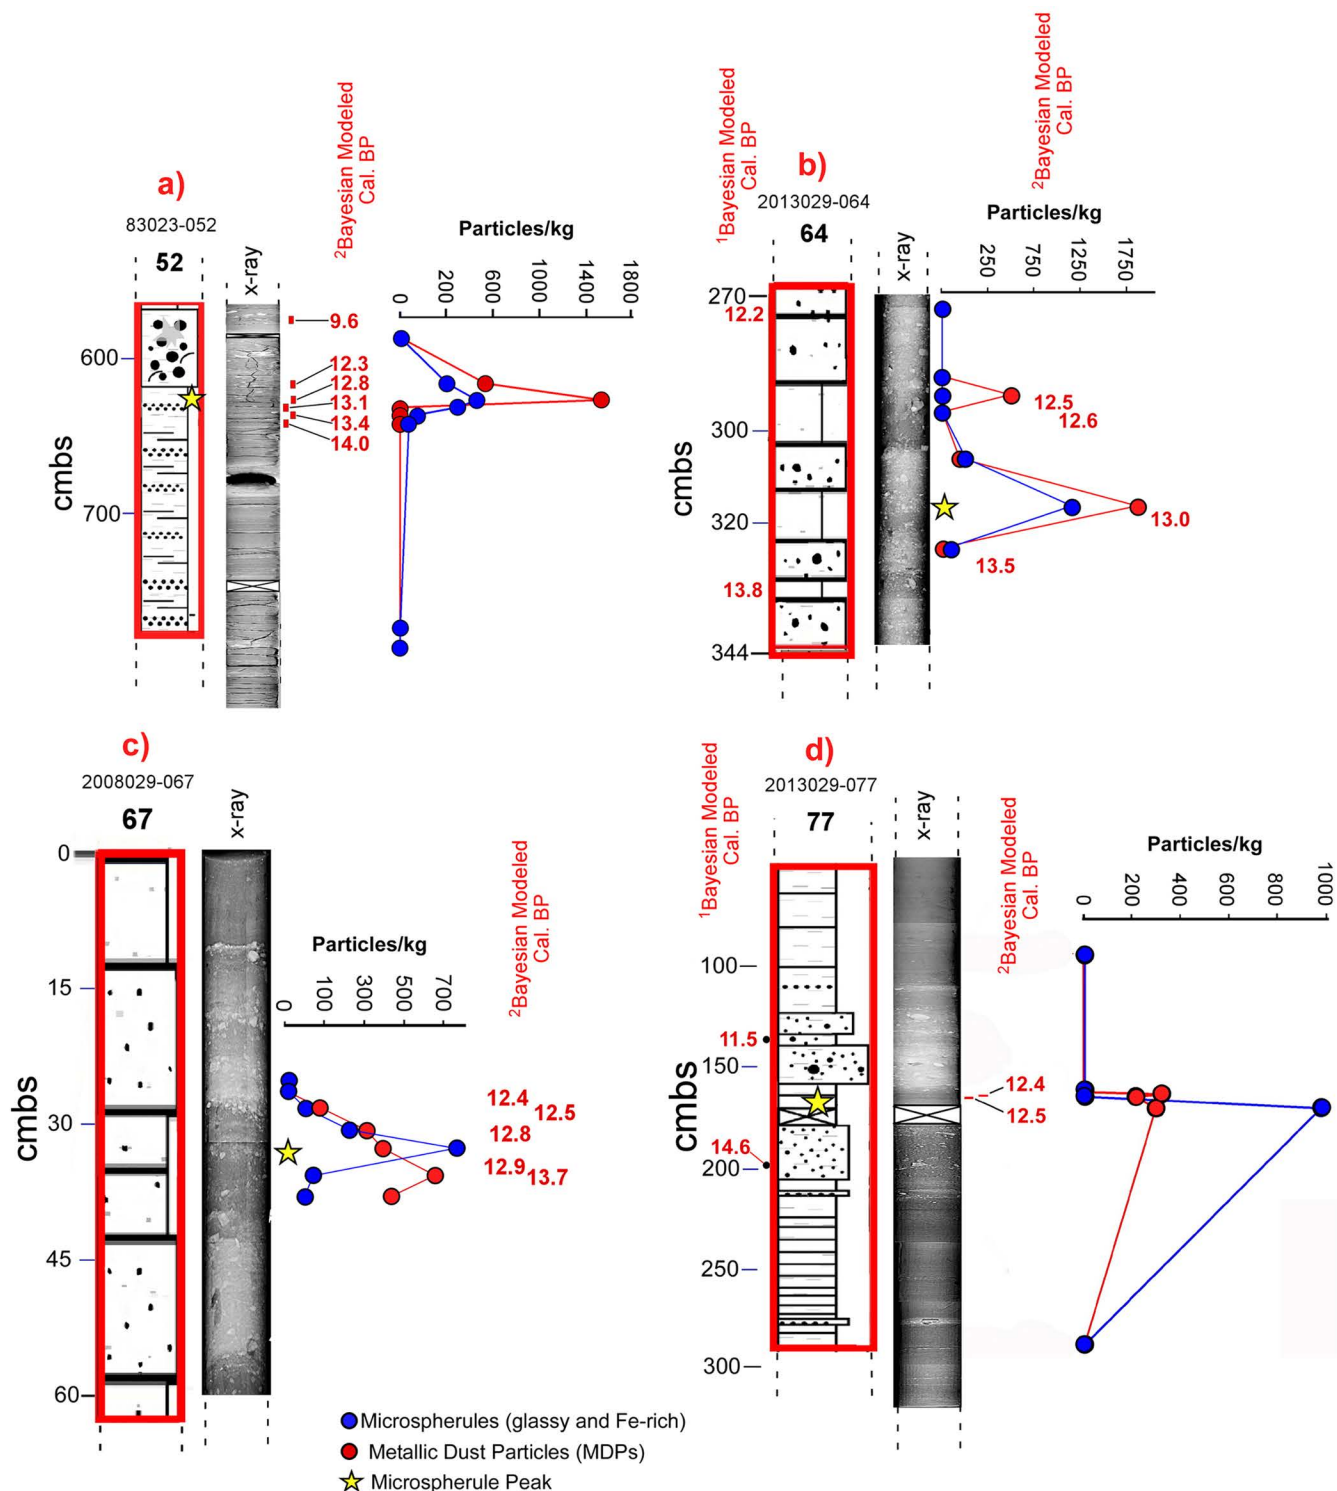

**Fig 4. Closeup of areas shown in Fig 3 (red boxes) illustrating core lithology, core x-ray images, microspherule (MSP) and metallic dust particle (MDP) peaks (spherules/kg), and calibrated radiocarbon ages.** <sup>1</sup>Bayesian-modeled calibrated radiocarbon dates are from Jenner *et al.* [19] and <sup>2</sup>this study (see SI, Table S1 and Bayesian-modeled ages in SI, Tables S2-S5, [https://zenodo.org/uploads/15330698]). The x-ray images in panels a) and d) are stretched laterally to improve visibility. A yellow star indicates the YDB microspherule peak. Refer to Fig 3 for lithology keys and optical and x-ray images for cores in SI, Figs S254-257 (https://zenodo.org/uploads/15330698). The figure was generated from data from Jenner *et al.* [19].

<https://doi.org/10.1371/journal.pone.0328347.g004>



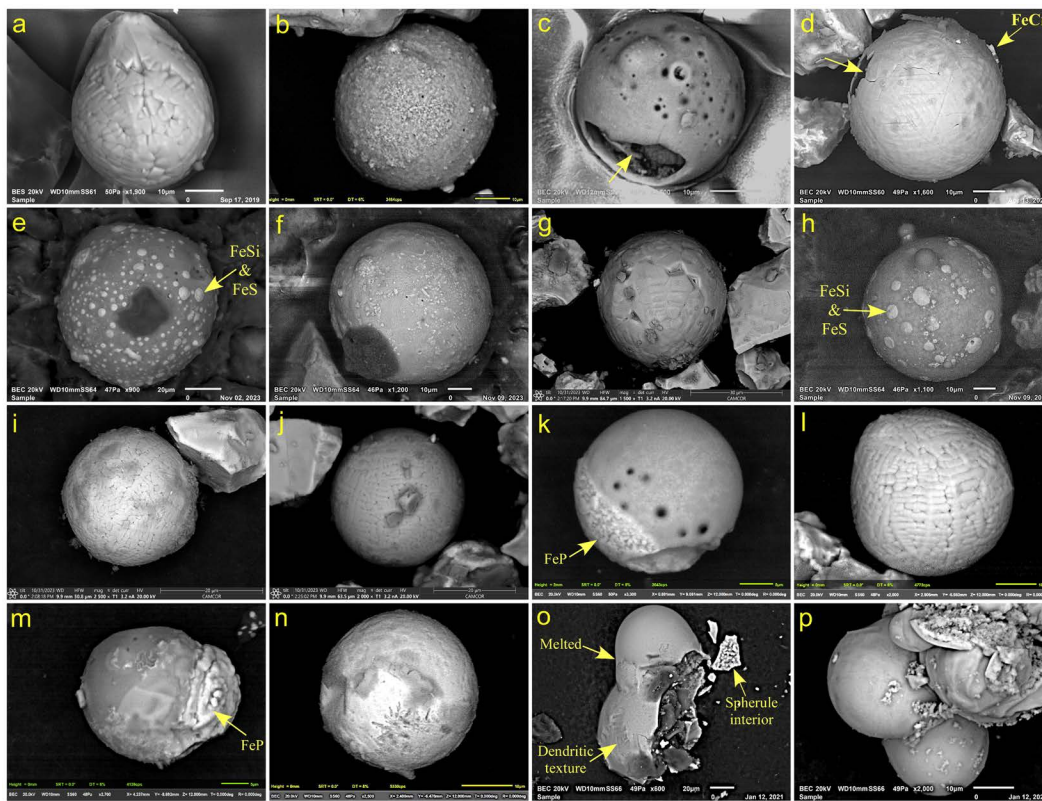

**Fig 5. Examples of Fe-rich and silica-rich impact microspheroles from Baffin Bay cores: Core 83023–052 (a–d); Core 2013029–064 (e–h); Core 2008029–067 (i–n); and Core 2013029–077 (o–p).** Features include aerodynamically-shaped microspheroles (panels a and l); a broken microspheroles revealing a hollow interior (panel c); a hollow microspheroles with a bleb of a low-oxygen transitional mineral phase between chromite ( $\text{FeCr}_2\text{O}_4$ ) and ( $\text{Fe}_2\text{Cr}_2\text{O}_4$ ). (panel d); microspheroles with rounded blebs consisting of a mix of iron sulfide and iron silicide ( $\text{FeSi}$  and  $\text{FeS}$ ), indicating formation in a reducing environment (panels e and h); multiphase microspheroles with possible secondary impacts of melted material containing iron phosphide ( $\text{FeP}$ ) (panels k and m), also indicating a reducing environment; microspheroles a, d, g, i, j, l, and o showing dendritic texture; and conjoined microspheroles showing dendritic textures, areas of melting, and interior fragments (panels o and p). Microspheroles c, e, f, and h are silica-rich (See SI, Fig S9, <https://zenodo.org/uploads/15330698>); all others are Fe-rich. Diameters for 73 microspheroles ranged from 163 to 4  $\mu\text{m}$ , with an average of 64  $\mu\text{m}$ . See SI, Figs S10–S58 (Core 52); S117–S127 (Core 64); S168–179 (Core 67); S223–S231 (Core 77) for EDS analysis of microspheroles (<https://zenodo.org/uploads/15330698>).

<https://doi.org/10.1371/journal.pone.0328347.g005>

layers and samples above and below the YDB (Figs 9 and 10, SI, Figs S7 and S8, and SI, Table S7 <https://zenodo.org/uploads/15330698>). For this analysis, we focused on the total masses of six key elements (Pt, Ir, Ni, Co, Cr, and Cu) since these are typically enriched in extraterrestrial material (Fig 9). The nanoparticles enriched in the heavier platinum group elements (PGEs) (Pt & Ir) peak in layers in or slightly above the peak in microspheroles. In contrast, the distributions of nanoparticles enriched in lighter cosmogenic enriched elements (Co, Cr, Cu) increase significantly a few cm above the peaks of impact microspheroles to reach peak concentrations.

Analyses of elemental mass ratios for selected elements within nanoparticles (Fig 10) show a similar pattern to that of the individual elements (Fig 9). Nevertheless, changes in elemental ratios within nanoparticles can be more instructive than raw abundances because they may reveal elemental sources. Typically, ratios of elements from a similar terrigenous source (e.g., magma or mantle rocks) remain consistent with changing depth or age, whereas a change in a ratio often signals the influx of elements from a different source, such as that from an extraterrestrial body. Increases in key elemental ratios (Pt/Ir, Pt/Pd, Pt/Fe, Co/Fe, Cr/Fe, and Ni/Fe) indicate an increase in the masses of Pt, Co, Cr, and Ni relative to

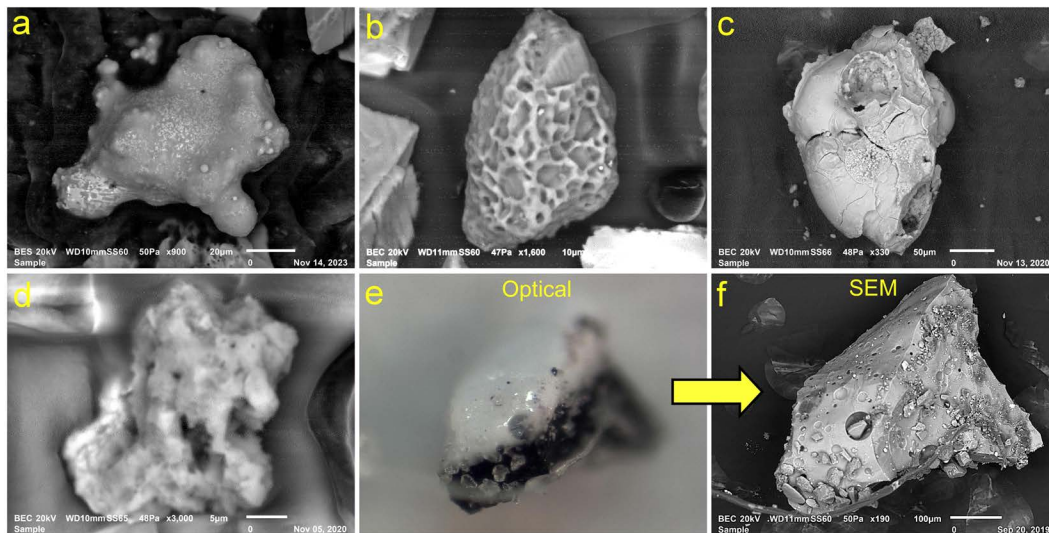

**Fig 6. Examples of meltglass from Baffin Bay cores:** (a) Agglutinated cluster of aluminosilicate and Fe-rich microspherules (Core 64\_312–318 cm); (b) Partially melted quartz grain (Core 52\_574–579 cm); (c) Fe and Cr-rich aluminosilicate meltglass (Core 52\_625–630 cm); (d) Agglutinated potassium-enriched aluminosilicate meltglass (Core 52\_630–635 cm); (e) Optical image; and (f) SEM image of Ti-rich aluminosilicate meltglass particle (Core 52\_574–579 cm). See SI, Figs S87–S102 (Core 52) and S157–S167 (Core 64) for EDS data (<https://zenodo.org/uploads/15330698>).

<https://doi.org/10.1371/journal.pone.0328347.g006>

other elements in nanoparticle assemblages. In this study, nearly all the elemental ratios in the nanoparticle assemblages began to increase in the upper part of the YDB layer, reaching peaks a few cm above the microspherule peaks. The nanoparticle elemental mass ratios for Core 64's bulk sediment are shown in SI, Figs S7 and S8 and SI, Table S7 (<https://zenodo.org/uploads/15330698>).

### Bulk oxygen isotope analysis

The evidence indicates that the core material investigated in this study comprises terrestrial sediment with a small percentage of impact-derived microspherules and MDPs interpreted as cometary dust. As demonstrated by the trace element abundance data presented in this paper, the microspherules are predominantly terrestrially-derived material mixed with ~1–2% of extraterrestrial material. However, larger extraterrestrially-derived components have been obtained from drill cores taken from older impact sites elsewhere. For example, a high concentration of extraterrestrial material was identified in the piston cores obtained from the Late Pliocene deep-sea Eltanin impact structure [51]. This material was initially interpreted as being derived from a mesosiderite impactor [51], an interpretation that was subsequently confirmed by bulk oxygen isotope analysis [52]. Identification of ordinary chondrite fragments in drill cores from the 145-Myr-old Morokweng crater in South Africa [53] has also been confirmed by bulk oxygen isotope analysis (Open University, unpublished data).

To test the possibility that some of the Baffin Bay drill cores may contain a significant extraterrestrial component on a local scale, we performed bulk oxygen isotope analysis by laser fluorination on selected samples. These analysis results are in Appendix Table A1, along with the results from the internal obsidian standard. Based on 38 repeat analyses, the obsidian standard has the following composition:  $\delta^{17}\text{O} = 3.81 \pm 0.05 \text{ ‰ (2SD)}$ ;  $\delta^{18}\text{O} = 7.27 \pm 0.10 \text{ ‰ (2SD)}$ ;  $\Delta^{17}\text{O}^* = 0.00 \pm 0.02 \text{ ‰ (2SD)}$  \*linearized value with slope = 0.5247 [54]. This study's three obsidian analyses closely agree with this value (Appendix Table A1). In particular, the mean ( $n = 3$ )  $\Delta^{17}\text{O}^*$  value of  $-0.01 \pm 0.01 \text{ ‰ (2SD)}$  is within the uncertainties of the value obtained by Starkey *et al.* [54].

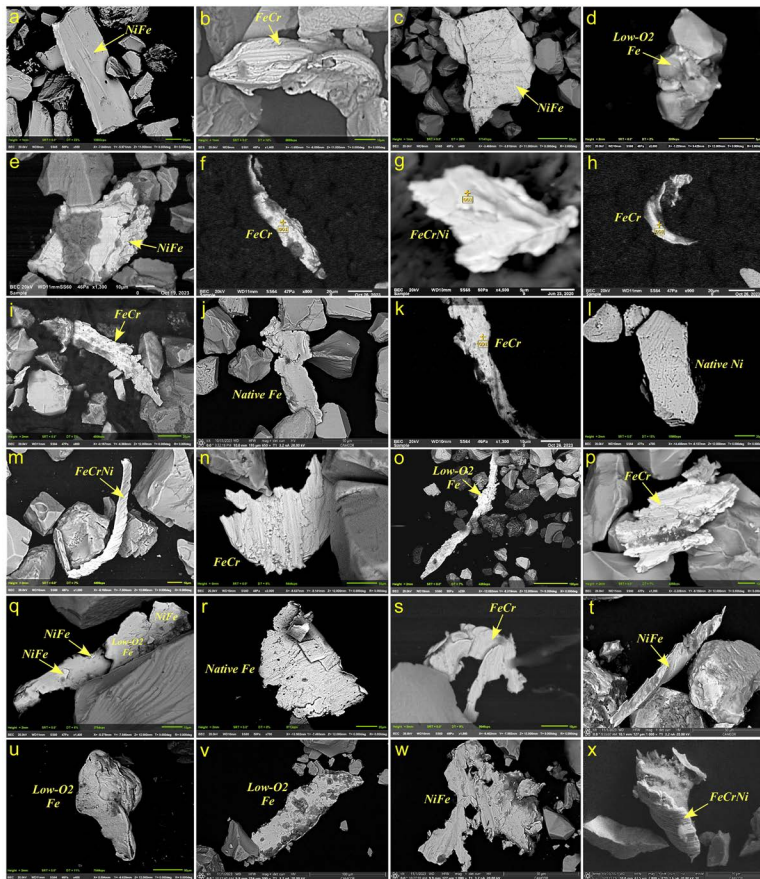

**Fig 7. Examples of Baffin Bay metallic dust particles (MDPs).** The MDPs range from unmelted to partially-melted. They are typically enriched in Fe, Ni, and Cr and are oxygen-deficient (low- $O_2$  Fe), as labeled on each panel. Core 83023–052 (a–d); Core 2013029–064 (e–l); Core 2008029–067 (m–t); and Core 2013029–077 (u–x). MDPs in this figure range from ~20 to 150 $\mu$ m in diameter. See SI, Figs S59–S86 (Core 52), S128–156 (Core 64), S180–S209 (Core 67), and S231–S240 (Core 77) for EDS data (<https://zenodo.org/uploads/15330698>).

<https://doi.org/10.1371/journal.pone.0328347.g007>

## Foraminifera

Cross-shelf trough core 52 exhibits foraminiferal biofacies changes near the beginning of the YDB interval consistent with expected YD-related climatic/oceanographic changes. In contrast, mid-slope (cores 64 and 77) and basinal (core 67) foraminiferal assemblages are associated with water depths and related water masses and do not exhibit changes that can be definitively attributed to the Younger Dryas climatic change (see SI, “Foraminifera: Radiocarbon Dating and Environmental Setting” for a detailed description of the foraminiferal assemblages [<https://zenodo.org/uploads/15330698>]).

## Discussion

### Baffin Bay glacial evolution

Glaciogenic processes have primarily influenced the late Quaternary development of Baffin Bay [19,20]. Although the margins of the Laurentide and Innuitian Ice Sheets did not extend beyond the continental shelf edge of Baffin Bay during the Last Glacial Maximum (LGM) [55,56], glaciogenic sedimentary input was significant. These included till delta deposits within the Lancaster Sound trough mouth fan [20], sheet-like turbidites [57] in the Baffin Bay basin, and ice-shelf mass transport along the NE Baffin Bay slope [19,57–59]. Cross-shelf troughs, formed by ice streams during glacial episodes,



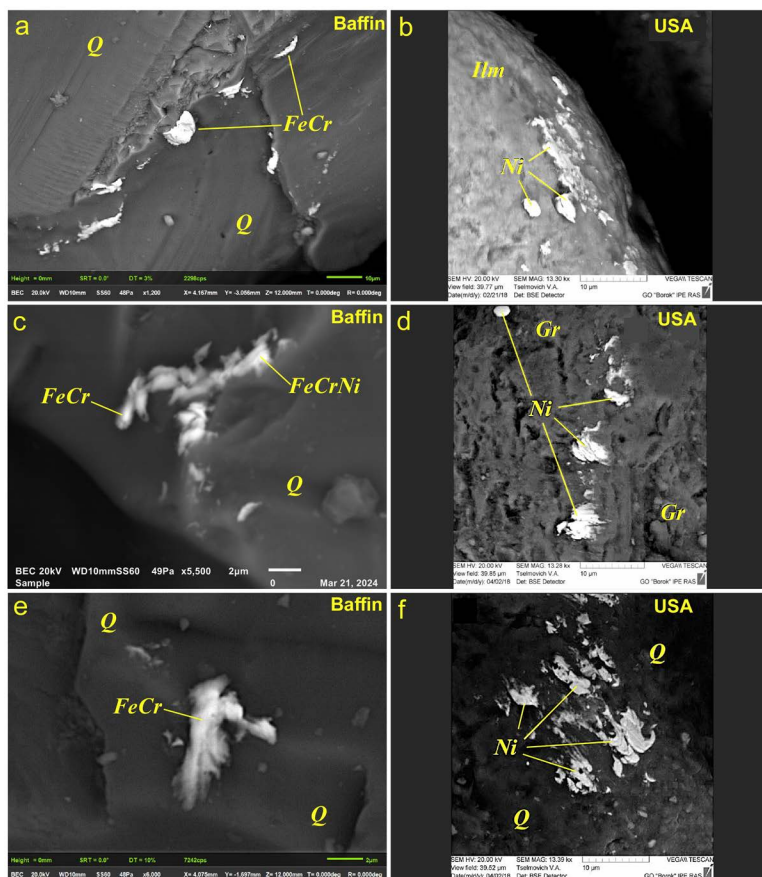

**Fig 8. Comparison of metallic melt splatter on quartz grains from Baffin Bay versus similar melt splatter from South Carolina, USA [37].** (a) Baffin Bay quartz grain (Q) splattered with FeCr. (b) South Carolina ilmenite grain (Ilm) splattered with native Ni [37]. (c) Baffin Bay quartz grain splattered with FeCr and FeCrNi. (d) Garnet (Gr) splattered with native Ni [37]. (e) Baffin Bay quartz grain splattered with FeCr. (f) South Carolina quartz grain splattered with native Ni [37]. Baffin Bay melt splatter morphologically and chemically matches many MDPs (i.e., FeCr and FeCrNi) that peak during the YD onset for all cores (see Fig 7). See SI, Figs S103–S116 (Core 52), S159–S167 (Core 64), S210–S222 (Core 67), and S241–253 (Core 77) for EDS data (<https://zenodo.org/uploads/15330698>).

<https://doi.org/10.1371/journal.pone.0328347.g008>

are common in western Baffin Bay [19] and have multiple sediment source areas, resulting in complex and varied lithostratigraphy within the basin [19]. Cores 52, 64, and 67 of this study (Fig 1) were almost certainly located beneath an ice shelf (Northern Baffin Bay Ice Shelf) during the LGM that likely collapsed between 16.5 and 14.2 ka prior to the YD onset [60], exposing these areas to relatively ice-free open water. Ice-rafted debris (IRD) dominated Baffin Bay sediments during the last deglaciation, while hemipelagic sediments dominated during the present interglacial [19,57,61]. Depositional events feature tan-colored, carbonate-rich, gravelly, sandy mud layers and sporadic ice-rafted detrital carbonate and gravel [19].

### Three potential causes of the Younger Dryas climate event

The abrupt onset of the Younger Dryas cooling event in the Northern Hemisphere is a well-documented phenomenon, marked by a significant decrease in temperature of approximately  $10^{\circ}\text{C} \pm 4^{\circ}\text{C}$  [62,63]. This drastic cooling occurred within a year or less, indicating a rapid shift in atmospheric circulation and the initiation of cooling, which persisted for ~1200 years from ~12,800 to ~11,600 cal BP [64].



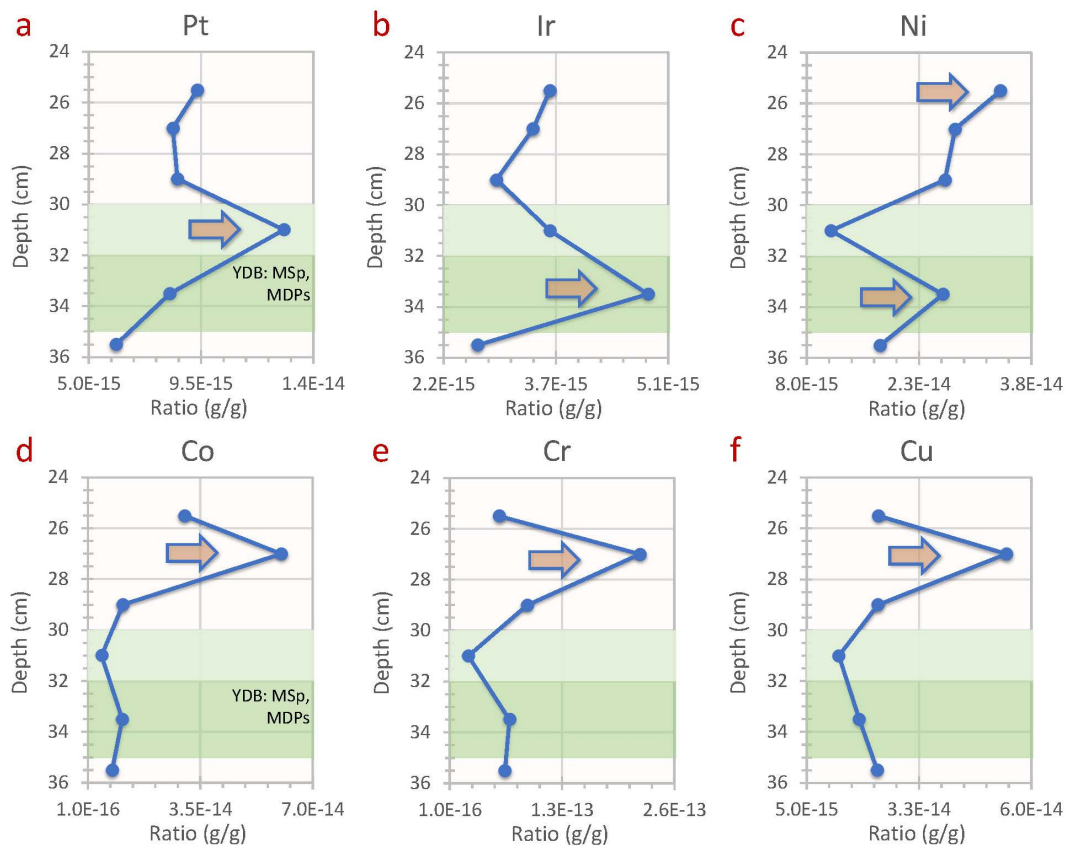

**Fig 9. Bulk Sediment Elemental abundance peaks in nanoparticles, Core 67 determined by SP-ICP-TOF-MS.** The mean mass abundances of six key elements (Pt, Ir, Ni, Co, Cr, and Cu) peak in the YDB layer; they are also typically enriched in extraterrestrial material, suggesting an ET component in the nanoparticles. The layer with peaks in inferred impact microspherules and CDPs is darker green, and the layer with lesser abundances of apparently reworked impact material is lighter green. Similar elemental profiles for Core 64 data can be found in SI, Figs S7 and S8 (<https://zenodo.org/uploads/15330698>).

<https://doi.org/10.1371/journal.pone.0328347.g009>

**Meltwater flooding and thermohaline circulation.** The conventional hypothesis, widely accepted, attributes the triggering of this abrupt Younger Dryas cooling (12.8 ka) to the failure of the ice dams on proglacial Lake Agassiz and other related lakes. These failures led to a sudden and massive diversion of the overflow water from the Mississippi Basin to the St. Lawrence Basin through newly opened eastern outlets (Lake Superior/St. Lawrence Seaway) and through northwestern outlets into the Arctic Ocean via the Mackenzie River [63,65–68]. Moreover, modeling experiments suggest that a collapse of the Keewatin Ice Dome of the Laurentide Ice Sheet through Hudson Strait into the North Atlantic also contributed to the freshwater forcing leading to the Younger Dryas cooling [64]. The diversion of continental interior drainage and its intensification in the early Younger Dryas were of sufficient magnitude to freshen the surface waters of the Arctic Ocean and the northernmost Atlantic. This drainage resulted in a cap of low-salinity surface waters, which strongly reduced thermohaline circulation and led to the abrupt climatic feedbacks that caused the Younger Dryas cooling to persist for ~1200 years [63,67,69,70].

**Volcanic triggering.** Baldini *et al.* [71] offered an alternative hypothesis, invoking sulfur-rich volcanic aerosols from the Laacher See eruption (LSE) as the trigger for the YD. They argued that ice core stratigraphy links the LSE (~12,880 years ago) as the initial trigger for YD cooling, which was then amplified by shifts in oceanic circulation and sea ice expansion, sustaining North Atlantic cooling. While direct climatic effects from volcanic aerosols would have lasted only ~1–3 years,

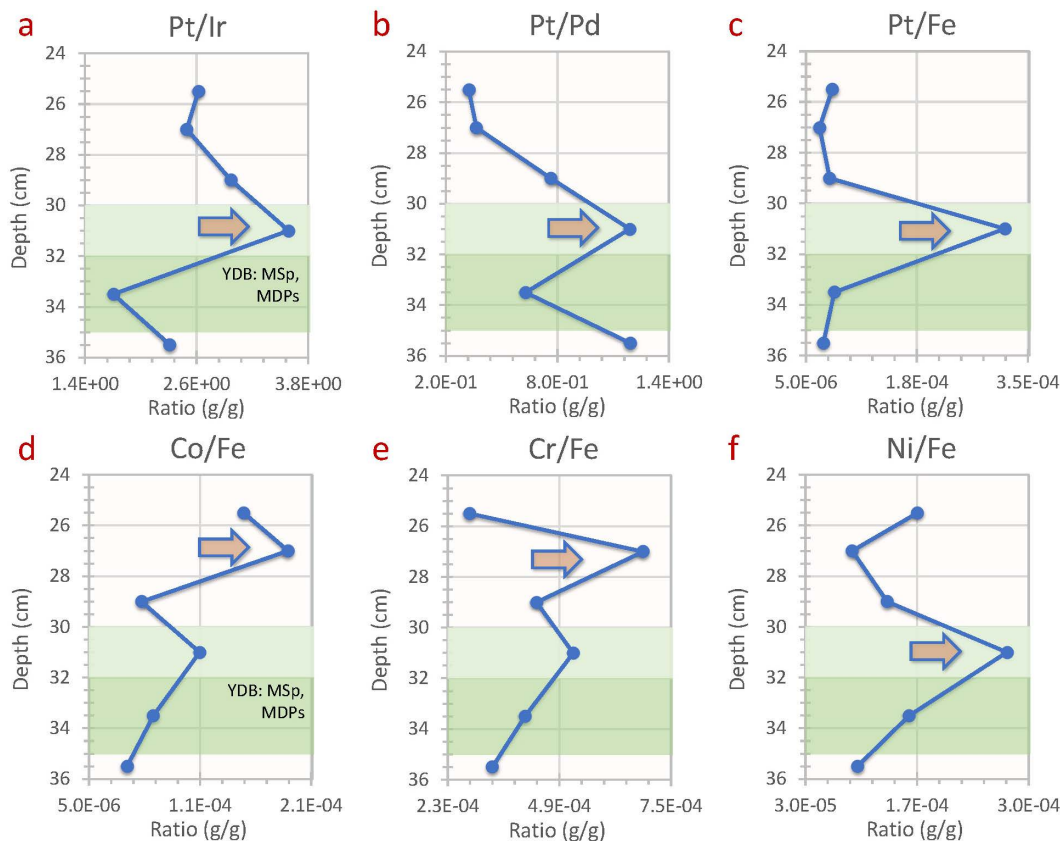

**Fig 10. Bulk sediment nanoparticle elemental mass ratios for Core 67 determined by SP-ICP-TOF-MS.** Mean mass elemental ratios within individual nanoparticles of seven key elements (Pt, Pd, Ir, Fe, Ni, Co, and Cr) that are typically enriched in extraterrestrial material. The layer with peaks in inferred impact microspherules and CDPs is darker green, and the layer with lesser abundances of apparently reworked impact material is lighter green. These ratios indicate a relative increase in the masses of Pt, Co, Cr, and Ni assemblages relative to other elements. Nearly all ratios begin to increase in the upper part of the YDB layer, reaching peaks a few cm above the arrows. The same elemental mass ratios for Core 64 are shown in SI, Figs S7 and S8 (<https://zenodo.org/uploads/15330698>). The ratio of Pt to Pd > 1.0 is expected if an exogenic ET input of Pt occurred, as noted by Moore *et al.*[50].

<https://doi.org/10.1371/journal.pone.0328347.g010>

Baldini argued that feedback mechanisms prolonged the climate shift. However, Warken *et al.* [72] countered this interpretation using high-resolution age correlations between German speleothem and Greenland ice core records, which clearly record the LSE. These show that YD cooling occurred synchronously across Europe and Greenland, approximately 150–160 years *after* the LSE, which they dated at  $13,008 \pm 8$  years B.P. Arguing against a volcanic connection to the LSE, Kletetschka *et al.*[73] reported finding a stratigraphically distinct LSE tephra layer that predates the YDB microspherule layer in a lake core in the Czech Republic. The age differences are critical by first challenging the interpretation of a delayed climatic response and refuting an LSE volcanic aerosol trigger for the YD climate change by demonstrating that the LSE eruption occurred well before the onset of the YD, making it unlikely to be the trigger.

**The Younger Dryas Impact Hypothesis (YDIH).** The Younger Dryas impact hypothesis posits that multiple cosmic air-bursts/impacts triggered the abrupt onset of the Younger Dryas cooling episode [1,74]. This hypothesis suggests that the impact event was both the triggering mechanism and the energy source necessary to shift the climate system into a significant cooling mode in the Northern Hemisphere. Major, abrupt shifts in the atmosphere and cryosphere caused

the initial cooling. This shift began with reduced solar radiation from increased atmospheric dust loading and biomass burning, producing an impact winter [75,76]. This initial cooling was immediately followed by surface water freshening of the Arctic and northernmost Atlantic surface waters caused by outburst flooding and ice sheet destabilization (ice-berg calving) that strongly reduced thermohaline overturning circulation. This reduction, in turn, reinforced Northern Hemisphere cooling marked by the YD episode that lasted for ~1200 years, long after its initiation by the cosmic impact event [1,74,77].

Since 2007, numerous publications have presented evidence consistent with the YDIH from sites on six continents. This evidence includes anomalously high concentrations of multiple impact-related proxies, including anomalies in platinum [8,9,50,78–83], iridium [1,9,80,84,85], magnetic & non-magnetic microspherules [1,8,9,42,43,81–83,86,87], meltglass [8,9,47,73], nanodiamonds [8–10,80,88–90], and combustion aerosols and soot [8–10,49,75,76,79,80]. These proxies have been reported in a sediment layer dating to the lower Younger Dryas Boundary (YDB) across North America [1], central Mexico [91], South America [92,93], South Africa [94], Europe [1,87,95–97], Greenland [84], the Middle East [8–10,80] and in lacustrine and ice core records globally [75,76].

The YDIH has been challenged in several studies questioning the validity of the reported impact proxies, the timing of the purported impact event, and its presumed effects on global climate, ecosystems, and human societies [98–112]. Critics have suggested that reported impact proxies (e.g., microspherules and platinum) from shallow terrestrial sites are instead industrial contaminants rather than serving as evidence for an impact [109]. Identification of the YDB-dated impact layer containing key proxies in Baffin Bay marine sediments refutes this claim, given the layer's remoteness in cores up to 6+ meters beneath the ocean floor, below up to 2400 meters of water, and far from potential industrial contamination.

### Baffin Bay microspherules

Microspherules from YDB-dated sediments in the Baffin Bay cores were analyzed using SEM/EDS and LA-ICP-MS to determine platinum, Ni, Co, and Cr relative abundances, which are typically enriched in ET material. The compositions of the Baffin Bay microspherules compositions do not overlap with dust particles from Comet Wild, cosmic dust from the stratosphere, or cosmic dust particles reported from sites in Russia [21–23] and the USA [37] and exhibit only a weak overlap with micrometeorites (Figs 11a,c and 12a,c). These findings are consistent with results from microspherules at other YDB sites, indicating a composition dominated by terrestrial target rock with only small percentages (0.3 to 2 wt%) of impactor material [15–18]. Baffin Bay microspherules exhibit a weak overlap with meteoritic material such as chondrites, achondrites, and iron meteorites and a moderate overlap with Antarctic microspherules (Fig 13) (see SI, Table S8a,b [https://zenodo.org/uploads/15330698] for data and SI, Table S9 for sources of proxy comparisons [data and references]).

A terrestrial origin for Baffin Bay microspherules is consistent with their Fe/Ni and Fe/Cr ratios that strongly overlap with terrestrial crustal material and only partially with impactites, mantle, and volcanic material (Fig 14). Known impact-related material, including impact microspherules (i.e., microtektites and microkrystites) and meltglass, have been found to contain from 0.3 to 2 wt% impactor material [15–18]. To further test for an extraterrestrial (ET) component, we assumed that most Ni and Cr microspherule concentrations were derived from 1 wt% ET material mixed with 99 wt% terrestrial material. Because ET concentrations of Ni and Cr are typically far higher (than crustal abundances) (~35× for Cr and ~315× for Ni) [113], we multiplied the Ni and Cr concentration by 100 and compared them again with the uncorrected ratios, an approach similar to that used for the study of known impact craters [15,17,18,113]. This plot reveals that the ET-normalized Baffin Bay ratios of the microspherules entirely overlap Comet Wild dust and stratospheric cosmic dust (Fig 11b,d) and, thus, are consistent with them containing ~1 wt% ET material.

The same pattern is evident when the ET-normalized Baffin Bay ratios are compared to micrometeorites from Antarctica and cosmic dust samples from Russia and the USA [21–23,37] (Fig 12b,d). Based on this compositional data, we propose that Baffin Bay microspherules comprise terrestrial target materials melted by touchdown airbursts [114,115] and impacts (See data sources for proxy comparisons in SI, Table S9) (https://zenodo.org/uploads/15330698).

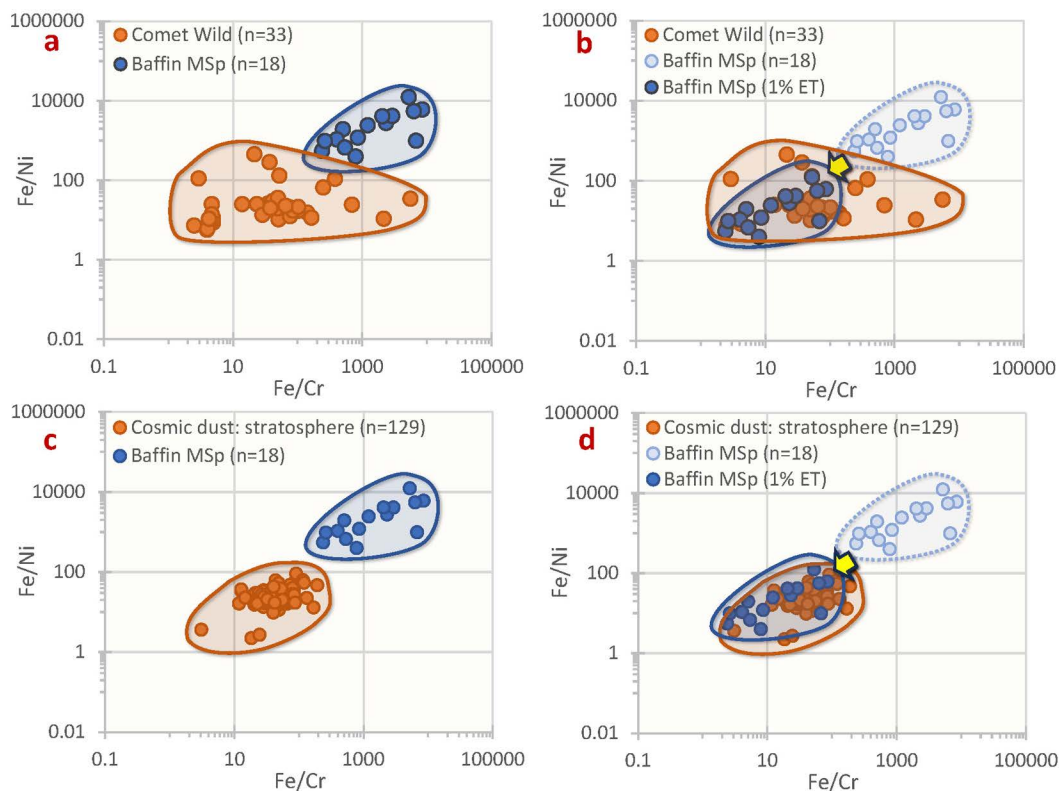

**Fig 11. Comparison of Fe/Cr and Fe/Ni ratios between Baffin Bay microspherules (MSP), cometary material, and cosmic dust.** (a) Particles retrieved from the debris trail of Comet Wild (orange;  $n=33$ ) do not overlap with Baffin Bay microspherules (blue;  $n=18$ ), suggesting that the microspherules are not dominated by ET material. (b) However, if it is inferred that the Cr and Ni were mostly derived from an ET source comprising  $\sim 1$  wt% of the impactor, there is excellent correspondence, e.g., as reported by Koeberl *et al.* [16]. (c) Cosmic dust particles ( $n=129$ ) collected from the stratosphere also do not overlap. (d) If Cr and Ni are inferred to comprise  $\sim 1$  wt% of the impactor, this results in excellent correspondence. The ratios show that Baffin microspherules typically contain less Cr and Ni than most cometary materials, consistent with a dominance of terrestrial materials. See SI, Tables S8a,b, and S9 for Baffin LA-ICP-MS data and sources of proxy comparisons (<https://zenodo.org/uploads/15330698>).

<https://doi.org/10.1371/journal.pone.0328347.g011>

## Origin of Baffin Bay Microspherules

Analyses of YDB microspherules from Baffin Bay cores indicate that they are primarily produced from the melting of surficial sediments during touchdown airbursts and deposited as distal ejecta (microtektites and microkrystites). This inference is consistent with an earlier study by Wittke *et al.* [42], who concluded that YDB microspherules were mainly composed of terrestrial target rock and that an estimated  $\sim 10$  million tonnes of YDB microspherules were deposited over 50 million square kilometers on four continents. In the following, we compare and contrast some possible origins for the Baffin Bay microspherules summarized as follows, and then with specific discussions:

- Meteoritic ablation and cosmic influx (ruled out by low MgO content) [116].
- Mantle material (excluded as mantle processes do not produce microspherules) [42,80].
- Volcanic activity (eliminated because of the absence of tephra and sulfur, and volcanoes only produce silica-rich microspherules) [42,47,75,76].
- Wildfires (temperatures insufficient for formation) [42,117].



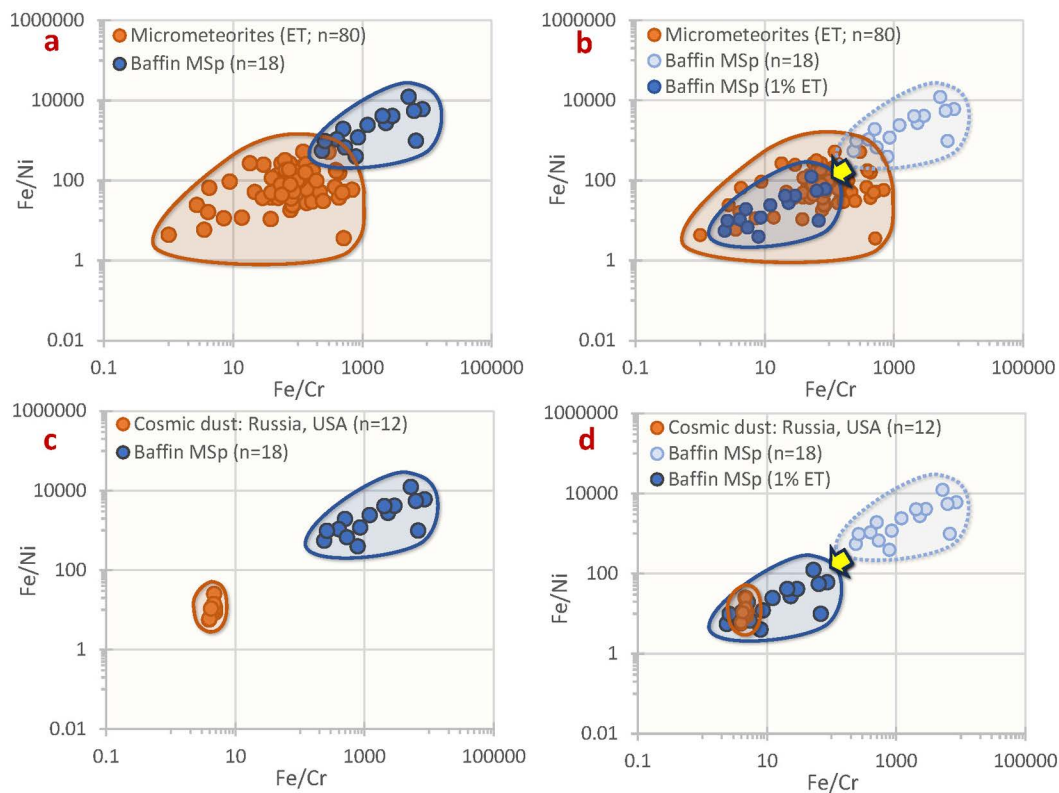

**Fig 12. Comparison of Fe/Cr and Fe/Ni ratios between Baffin Bay microspherules (MSp), micrometeorites, and cosmic dust.** (a) Antarctic ET micrometeorites ( $n=80$ ) only weakly overlap with Baffin Bay microspherules (blue;  $n=18$ ), suggesting that most Baffin microspherules are not dominated by ET material. (b) However, if it is inferred that the Cr and Ni were mostly derived from an ET source comprising  $\sim 1$  wt% of the impactor, there is excellent correspondence. (c) Inferred cosmic dust from peat deposits in Russia ( $n=6$ ) [21–23] and the USA ( $n=6$ ) [37] also do not overlap. (d) If Cr and Ni are inferred to comprise  $\sim 1$  wt% of the impactor, this results in excellent correspondence. The ratios show that Baffin microspherules typically contain less Cr and Ni than most cosmic materials, consistent with a dominance of terrestrial materials. See SI, Tables S8a,b and S9 for Baffin LA-ICP-MS data and sources of proxy comparisons (<https://zenodo.org/uploads/15330698>).

<https://doi.org/10.1371/journal.pone.0328347.g012>

- Anthropogenic sources (excluded by core depth and location).
- Extraterrestrial impact (most likely based on the evidence).

Specifically:

1. **Meteoritic.** Differentiating between ablated meteoritic and impact microspherules often hinges on their MgO content. This is because meteoritic microspherules are dominantly silica-rich and originate from the more common stony asteroids, which also typically exhibit high MgO concentrations (Taylor *et al.* [116]), based on microspherules from Antarctic ice, which largely lacks terrestrial sediments. Of the 277 microspherules analyzed, 99 wt% contained  $>5$  wt% MgO with an average of 29.9 wt% (range 0.0–55.7 wt%). In contrast, 17 Baffin Bay microspherules averaged only 0.65 wt% MgO (range: 0.0–1.54 wt%), suggesting that they did not originate from meteoritic ablation or cosmic influx.
2. **Mantle.** A mantle origin for the microspherules can be discounted, as materials ascending from Earth's mantle are not known to produce microspherules [42,80].
3. **Volcanic.** Core sediments from Baffin Bay exhibit no tephra or detectable related sulfur content, indicating that YDB impact proxies are unlikely to be of volcanic origin. Supporting this, Wolbach *et al.* [75,76] noted that the sulfate record in

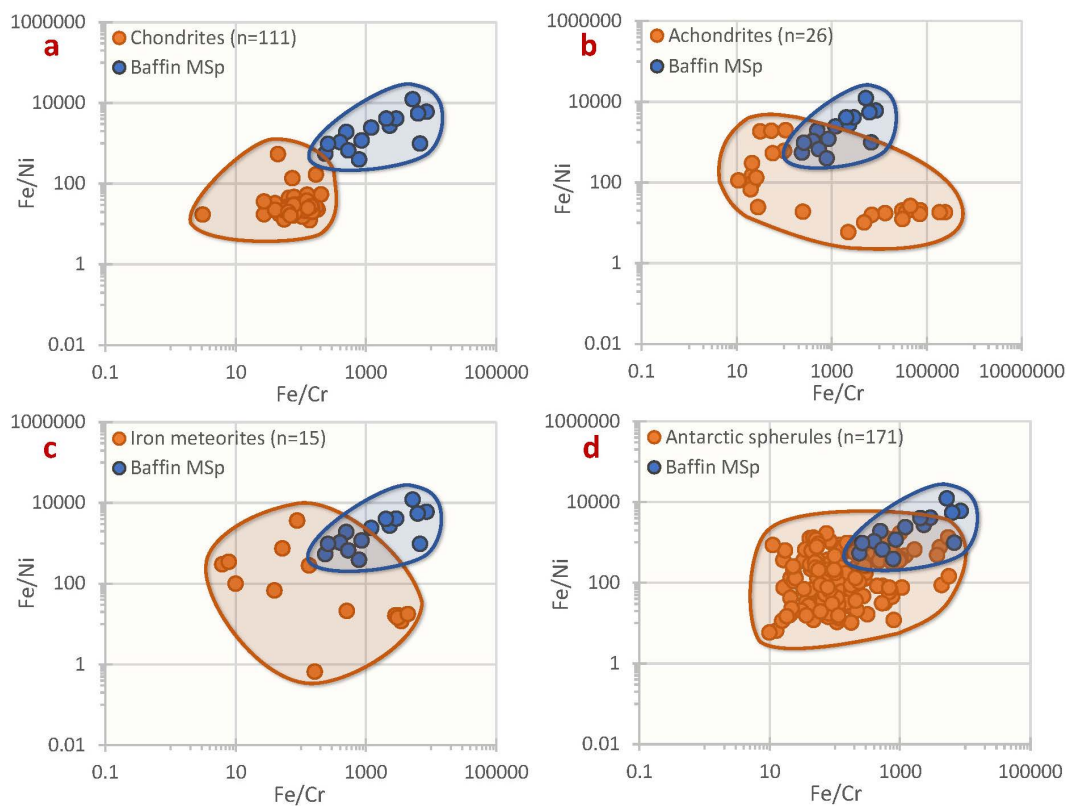

**Fig 13. Comparison of Fe/Cr and Fe/Ni ratios between Baffin Bay microspherules (MSP) and various meteoritic materials.** (a) Fe/Cr and Fe/Ni ratios of chondrites (orange;  $n=111$ ) partially overlap with Baffin Bay microspherules (blue;  $n=18$ ), as do (b) achondrites (altered chondrites;  $n=26$ ); (c) iron meteorites ( $n=15$ ); and (d) meteoritic microspherules ( $n=229$ ), from Antarctic ice and deep-sea deposits. These ratios show that Baffin microspherules typically contain less Cr and Ni than most ET material, consistent with a dominance of terrestrial materials. See SI, Tables S8a,b and S9 for Baffin LA-ICP-MS data and sources of proxy comparisons and references (<https://zenodo.org/uploads/15330698>).

<https://doi.org/10.1371/journal.pone.0328347.g013>

the Greenland ice sheet [118,119] indicates no significant volcanic eruptions within 50–100 years of the YDB. Similarly, Tselmovich [23] interpreted microspherule-like particles as cosmic dust in Russian peat deposits, noting an absence of active volcanism in that area. This observation also applies to Baffin Bay, where Iceland's nearest volcanic sources are downwind ~2000 km away. Furthermore, Baffin Bay microspherules do not align well with magma in biplots (Fig 14c), although they exhibit some overlap with crustal sources, interpreted as being terrestrial material melted during airburst/impacts (Fig 14a,b,d). In addition, Fe dendritic microspherules reported here and for other YDB sites globally are unknown from volcanic eruptions, which only produce silica-rich microspherules. Even then, volcanic microspherules are not widely distributed but are typically confined to the volcano's slopes during low-energy eruptions [42,47].

4. **Wildfires.** High-temperature minerals indicate that YDB microspherules did not form during wildfires, which only reach extreme maximum temperatures of ~1,450° C[117]. These temperatures are sufficient to form low-temperature carbon microspherules but not silica-rich and dendritic Fe-rich microspherules containing high-temperature, refractory minerals. Only two high-temperature minerals in Baffin microspherules (FeS, FeP) could plausibly have been formed during wildfires at the extreme high end of the recorded temperature range [117]. However, such temperatures are still less than required to melt silica (>1,700°C) [42]. Moreover, YDB microspherule peaks occur only in the YDB layer. If formation from frequent wildfires were possible, the peaks would be broadly distributed throughout the sequences, but they are rare instead.

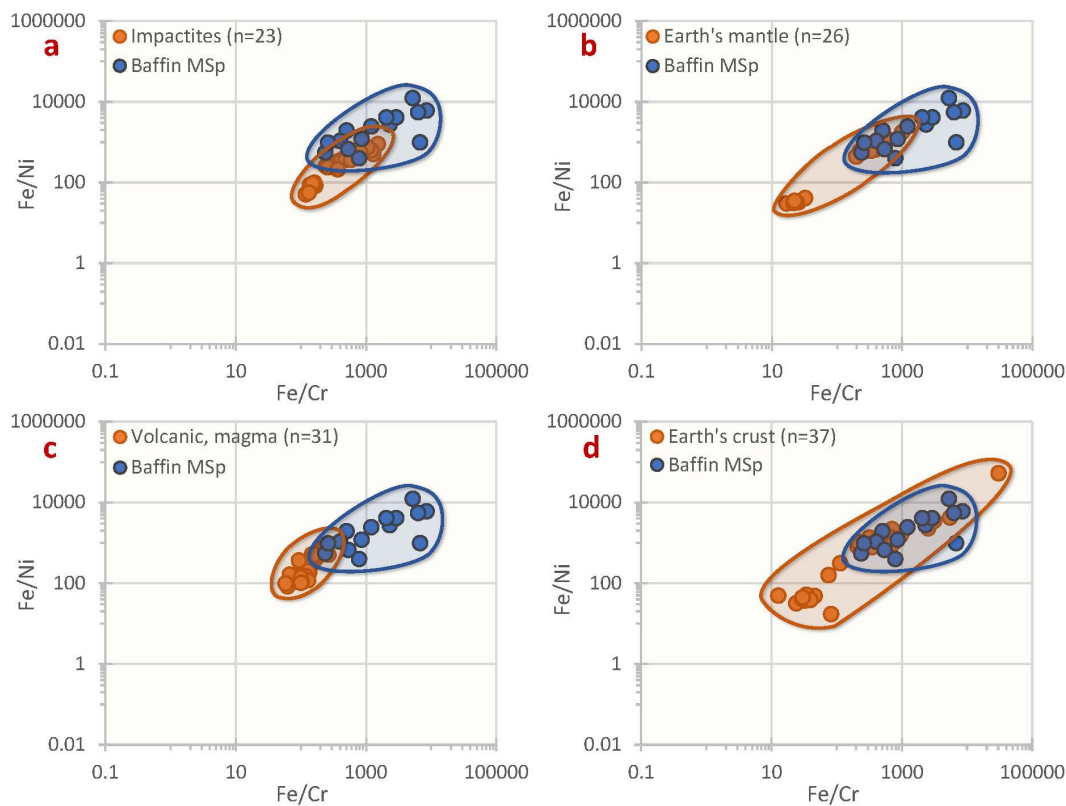

**Fig 14. Comparison of Fe/Cr and Fe/Ni ratios between Baffin Bay microspherules (MSp) and various terrestrial materials.** (a) Impactites (orange;  $n=23$ ), typically consisting of  $>98$  wt% terrestrial material, partially overlap with Baffin Bay microspherules (blue;  $n=18$ ), as well as (b) Ratios of mantle material ( $n=26$ ); and (c) Ratios of volcanic/magmatic materials ( $n=31$ ). (d) Ratios of crustal materials ( $n=37$ ) strongly overlap with Baffin Bay microspherules. The ratios indicate that terrestrial materials typically dominate Baffin microspherules. See SI, Tables S8 and S9 for Baffin LA-ICP-MS data and sources of proxy comparisons (<https://zenodo.org/uploads/15330698>).

<https://doi.org/10.1371/journal.pone.0328347.g014>

5. **Anthropogenic.** The remote geographic location of Baffin Bay cores, coupled with the significant water and core burial depths of the YDB layer, precludes any likely possibility that the microspherules were derived from fly ash or industrial contamination.
6. **Extraterrestrial.** Our evidence suggests that YDB Baffin Bay microspherules, as with other YDB examples elsewhere, most likely formed from terrestrial material mixed with a small percentage of ET material that melted during low-altitude touchdown airbursts/impacts [114,115]. Although we found no evidence to confirm a cometary source, this seems more likely based on previously reported fragments of YDB meltglass that are widely disbursed ( $\sim 12,000$  km from California to Syria). Although it is possible that numerous airbursts/impacts by fragments of a rubble-pile asteroid could account for such a wide distribution, a comet debris trail is the most likely explanation [6,120–123].

### Metallic dust particles (MDPs)

SEM/EDS with LA-ICP-MS (data; SI, Table S10) revealed that Baffin Bay YDB MDPs exhibit Fe/Ni and Fe/Cr ratios that show a significant overlap with (i) CDPs collected from Comet Wild by the NASA Stardust Spacecraft; (ii) the ratios of cometary dust collected from the stratosphere [124]; (iii) cometary dust from sites in the USA and Russia [21–23,37–39];

and (iv) with Antarctic micrometeorites [29] (Fig 15). This overlap in composition supports the interpretation that the MDP particles are of cometary origin.

Fe/Ni and Fe/Cr ratios in MDPs from the Baffin Bay cores also show some overlap with chondritic and achondritic meteorites, iron meteorites, and Antarctic microspherules (Fig 16). However, they show excellent overlap with cometary material (Fig 15), consistent with a cometary rather than a meteoritic origin. These observations suggest that some Baffin Bay YDB dust particles might be of meteoritic origin, although most have higher levels of Ni and Cr than previously measured for meteoritic material. The reason for this enrichment is unclear and requires further study.

Baffin Bay MDPs show poor or no overlap with terrestrial impactites, mantle material, volcanic magma sources, and Earth's crust (Fig 17). Most terrestrial materials contain much less Ni and Cr relative to Fe than nearly all Baffin Bay MDPs. This finding strongly suggests that these particles are likely of extraterrestrial (ET) rather than terrestrial origin, an interpretation consistent with CDPs described by other researchers. Baffin MDP data and sources of comparison data are in SI, Tables S10-S12.

CDPs from Baffin Bay are very similar to those reported by Tselmovich *et al.* [21–23,37], Sungatullin *et al.* [26,27,38,39], and Pechersky *et al.* [126–129] from sites in Russia and the USA (see Figs 18 and 19 and Table 2). The Baffin Bay CDPs are typically composed of native Fe, native Ni, NiFe, NiFeCr, and FeCr and show a wide range of morphologies depending on whether they are unmelted, melted, or partially melted. Some CDPs exhibit unusual featherlike or twisted forms,

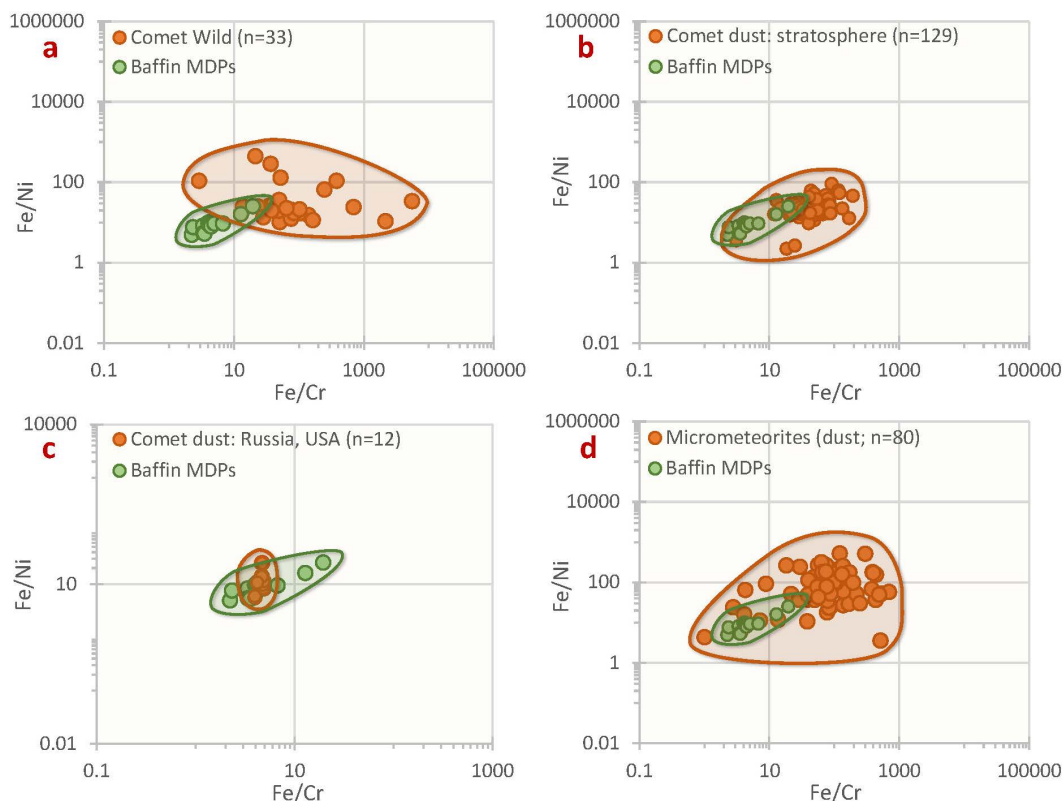

**Fig 15. Baffin Bay metallic dust particles (MDPs) compared to cometary material.** The Fe/Cr and Fe/Ni ratios of Baffin Bay MDPs overlap those of four types of cometary material: (a) CDPs retrieved from the debris trail of Comet Wild during the Stardust mission (orange;  $n=33$ ; green;  $n=15$ ).; (b) CDPs collected from the stratosphere ( $n=129$ ). (c) CDPs found in peat deposits from Selenga, Russia ( $n=7$ ), and several sites in South Carolina, USA ( $n=6$ ) [21,22,37] (see SI, Tables S9-S12). (d) CDPs of Antarctic micrometeorites ( $n=80$ ), which are considered primarily to be cometary dust (SI, Table S9) (<https://zenodo.org/uploads/15330698>). For comparison, upper continental crust ratios are 426 for Fe/Cr and 834 for Fe/Ni [125].

<https://doi.org/10.1371/journal.pone.0328347.g015>



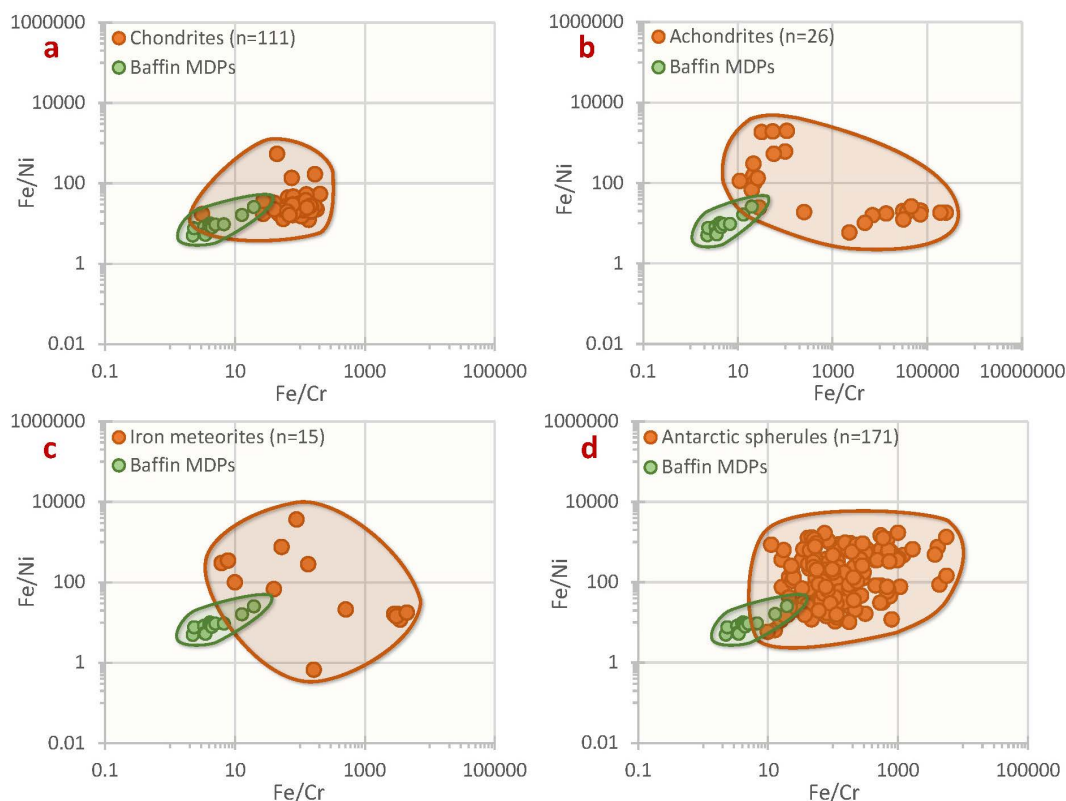

**Fig 16. Comparison of Baffin Bay metallic dust particles (MDPs) with meteoritic material.** The Fe/Cr and Fe/Ni ratios of about half of Baffin Bay MDPs partially overlap that of various meteoritic materials as follows, although some display greater enrichments in Ni and Cr relative to Fe in meteorites: (a) chondritic meteorites (orange;  $n = 111$ ; green;  $n = 15$ ); (b) achondrites (altered chondrites;  $n = 26$ ); (c) iron meteorites ( $n = 15$ ); and (d) meteoritic microspherules ( $n = 229$ ), from Antarctic ice and deep-sea deposits. For comparison, in the upper continental crust, ratios of Fe/Cr=426 and Fe/Ni=83498. See Baffin Bay MDP data in SI, Table S10. Data sources other than Baffin Bay can be found in SI, Tables S9, S11, and S12 (<https://zenodo.org/uploads/15330698>).

<https://doi.org/10.1371/journal.pone.0328347.g016>

similar to twisted chromite ( $\text{FeCr}_2\text{O}_4$ ) particles reported in the YDB layer from Abu Hureyra, Syria [80]. Other CDPs exhibit striated and curved morphologies or appear as thin, striated, flake-like particles with folded edges. Tselmovich *et al.* [21–23,37] propose that these morphologies result from partial melting during atmospheric entry or explosive detonations during an airburst (see Fig 19c,d).

Finally, we tested for and rejected possible contamination from coring equipment and metal tools by comparing SEM-EDS of the particles with that of coring hardware used to collect the cores and various types of industrial metal (see ternary plot in Appendix A and SI, Table S13). Most Baffin MDPs do not overlap with anthropogenic/industrial metallic particles, which typically group near the vertices. Clusters of nearly pure nickel-plated neodymium magnet coatings overlap with some MDPs, but contamination is unlikely because the magnets were shielded from the sample. Alternatively, cometary material can contain blebs of native nickel and native iron [38,130].

### Oxygen-depleted nickel

Nickel was found both in the form of films and as separate flake-like particles. We suggest that these forms result from the deposition of high-temperature nickel, either by high plasticity or by condensation from atomic nickel vapor produced in comet trails [130,131]. However, this suggestion is preliminary because samples directly from comets are unavailable for

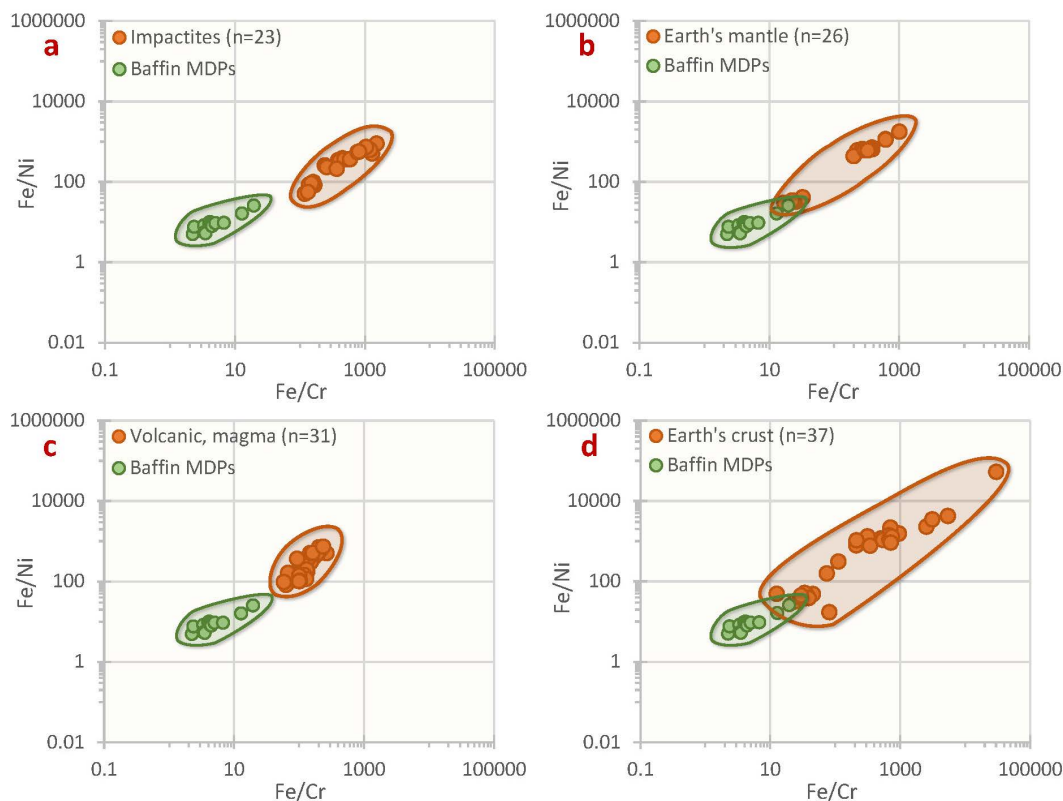

**Fig 17. Comparison of Baffin Bay metallic dust particles (MDPs) with terrestrial material.** The Fe/Cr and Fe/Ni ratios of Baffin Bay MDPs are compared to those of various terrestrial materials. (a) Ratios from impactites (orange;  $n=23$ ), which contain over 98 wt% terrestrial material, do not overlap with Baffin Bay dust particles (green;  $n=15$ ). (b) Ratios from mantle material ( $n=26$ ) exhibit only partial overlap with Baffin Bay dust particles. (c) Ratios of magma ( $n=31$ ) do not overlap with Baffin Bay dust particles. (d) Ratios of crustal material ( $n=37$ ) minimally overlap with Baffin Bay MDPs. For the upper continental crust, ratios of Fe/Cr=426 and Fe/Ni=834 [125]. See Baffin Bay MDP data in SI, Table S10 Data sources other than Baffin Bay can be found in SI, Tables S9, S11, and S12 (<https://zenodo.org/uploads/15330698>).

<https://doi.org/10.1371/journal.pone.0328347.g017>

analysis and because processes occurring during Earth's atmosphere's interaction with clouds of cometary metal vapor have been insufficiently studied.

### Baffin Bay platinum

The abundance peaks in Pt are inferred to result from the influx of extraterrestrial material. For further discussion of platinum found in the YDB layer in the Baffin Bay cores and elsewhere, see the discussion in the Supplementary Information in Moore *et al.* [50].

### Baffin Bay MDPs

The compositions of the Baffin Bay MDPs overlap with known cometary material retrieved from Comet Wild and with cometary dust particles retrieved from the stratosphere. Of 143 total Baffin Bay MDPs, 14 (10%) dust particles contain Mn without Ni and, therefore, are likely terrestrial, possibly from mantle deposits [21–23,37–39]. This finding is based on Agarwal [132], who observed that magnetite and wustite-bearing microspherules hosting Mn without any Ni traces are considered non-cosmic. Of the remainder, 120 MDPs (83%) contain no detectable Mn (limit of 0.01%), and 9 (6%) contain Mn with Ni, suggesting that all 129 MDPs (90%) are not terrestrial but rather cosmic in origin.

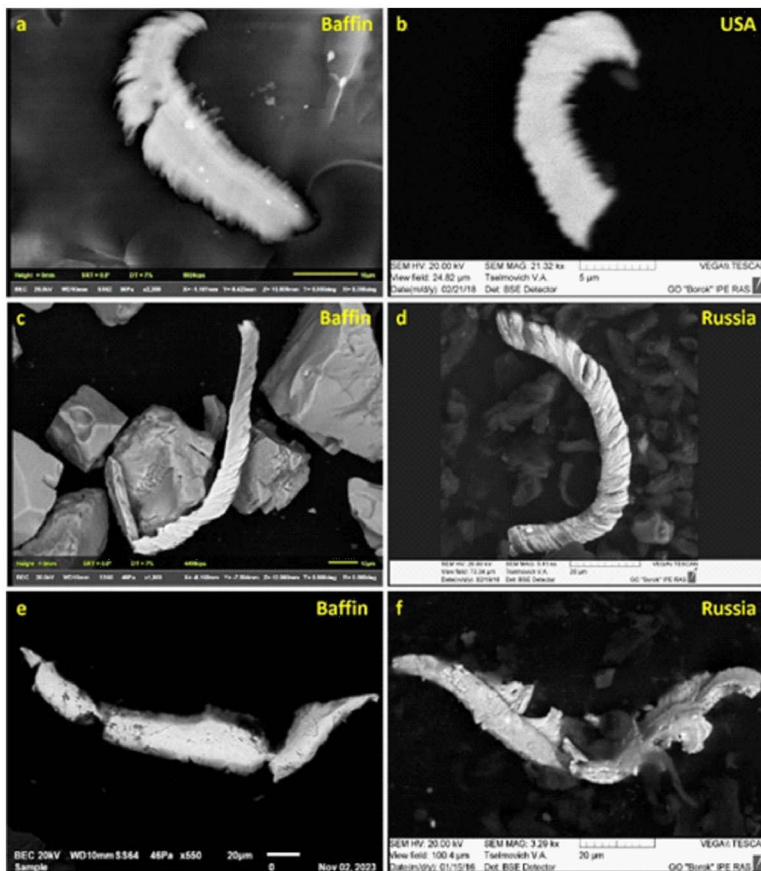

**Fig 18. Comparison of flake-like dust particles (MDPs) from Baffin Bay with cometary dust particles (CDPs) from South Carolina, USA [37] (N 33°48'40", W 78°49'00"), and Russia [21–23] (N 52°, W 88°).** The compositions of these particles include native Fe, native Ni, NiFe, NiFeCr, and FeCr, and range from melted to unmelted. (a–b) Feather-like particles. Their delicate features suggest that these particles remained *in situ* where deposited and were not reworked. (c–d) Twisted and layered morphologies. These particles resemble a twisted FeCr particle reported in the YDB layer from Abu Hureyra, Syria [80]. (e–f) Thin, linear morphologies. See SI, Tables S11 and S12 for elemental data for CDPs from sites in Russia and South Carolina (<https://zenodo.org/uploads/15330698>).

<https://doi.org/10.1371/journal.pone.0328347.g018>

## YDB spherule formation

Van Ginneken [115] described evidence suggesting the occurrence of a type-2 or touchdown airburst in Antarctica, which involves the impactor's vaporized material reaching Earth's surface at hypervelocity [133]. This interaction causes chemical exchanges between the superheated gas from the projectile and the vaporized ground material. In this example from Antarctica, the airburst interacted with ice, and thus, the microspherules produced were characteristic of a stony asteroid impactor with no terrestrial component. Unlike high-altitude airbursts, type-2 or touchdown airbursts occurring over land can generate abundant impact microspherules (microtektites and microkrystites) dominated by target melted material mixed with traces of the impactor [13,14] material. Microspherules containing a mixture of both target and impactor materials have been reported at terrestrial YDB sites on multiple continents [42,43,91,92,134].

For Baffin Bay, we detected no microspherules with compositions similar to stony asteroids, consistent with a proposed origin as melted terrestrial target rocks. We thus conclude that Baffin Bay microspherules were produced from terrestrial material mixed with a few percent of the impactor that melted during near-surface airburst plumes (type-2 or touchdown airburst) [115] or crater-forming impacts that reach Earth's surface rather than as a result of

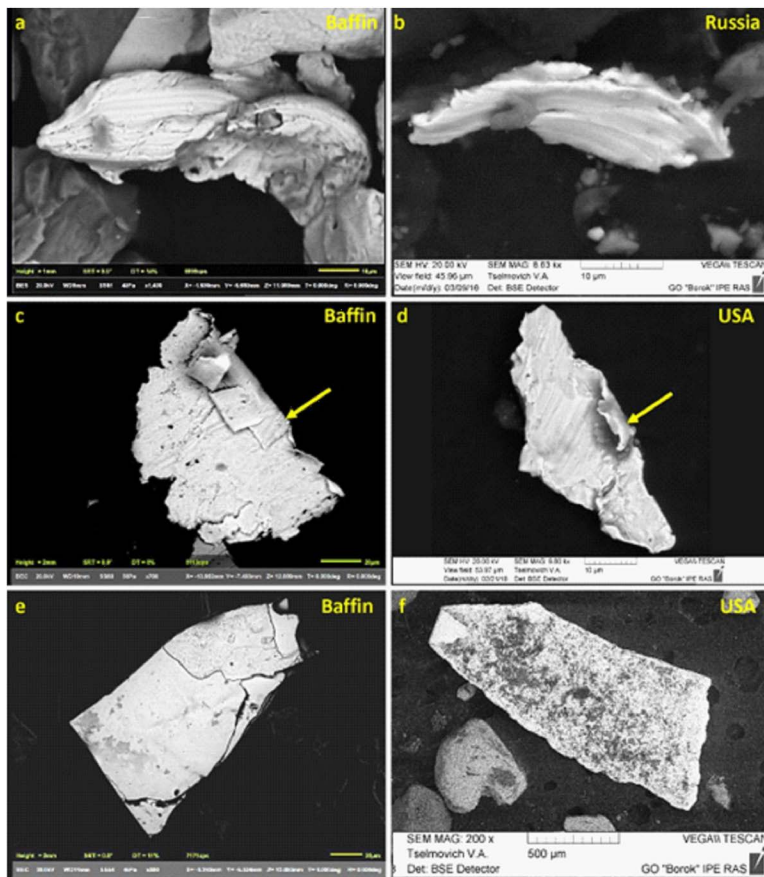

**Fig 19. Comparison of flake-like metallic dust particles (MDPs) from Baffin Bay with cometary dust particles (CDPs) from Russia [21–23] and South Carolina, USA [37].** The compositions of these particles include native Fe, native Ni, NiFe, NiFeCr, and FeCr. (a-b) Striated, curved particles. (c-d) Thin, striated, flake-like particles with folded edges (arrows). Some edges appear melted. (e-f) Thin, flake-like particles without striations. See SI, Tables S11 and S12 for elemental data for CDPs from sites in Russia and South Carolina (<https://zenodo.org/uploads/15330698>).

<https://doi.org/10.1371/journal.pone.0328347.g019>

meteoritic ablation or cosmic influx. Thus, while microspherule morphologies and surface textures resemble Type I cosmic microspherules [135], the elemental chemistry of Baffin microspherules is mostly terrestrial and indicates that they are microtektites and/or microkrystites [134,136]. Microspherules typically contain only 0.3 wt% to 2 wt% of impactor material [15–18]. Schmieder and Kring [137] and Simonson and Glass [134] collectively report >50 ejecta layers and “impact microspherule datum layers” (i.e., microtektites and microkrystites) that are a mix of terrestrial target material and a small percent of ET material. Some are associated with known impact craters (e.g., Chicxulub and Chesapeake Bay), but many have no known crater sources, yet impacts or airbursts have been invoked for their origins.

Identifying possible YDB craters or remnants of craters may require a different set of impact indicators than traditional impact cratering events because low-altitude contact airbursts may only produce shallow craters that are hard to recognize and erode quickly [115]. Impact proxies such as microspherules represent an “impact microspherule datum layer” as proposed by Simonson and Glass [136] for the YDB and provide evidence in support of the YDIH, even in the absence of identifiable craters [86].



**Table 2.** Comparison of metallic dust particles. This table presents compositions, numbers (#), and percentages of dust particles from three different locations: Baffin Bay (n=140), South Carolina (SC; n=98) [37], and Selenga, Russia (n=360) [21–23]. Fifteen elemental combinations (highlighted) are common across at least two of the three sites: Fe-native, Fe-low O<sub>2</sub>, FeO, FeCr, FeCrNi, FeNiCu, FeCrNiCu, FeP, FeZn, NiFe, Ni-low O<sub>2</sub>, Ni-native, NiO, NiZn, and CuZn. Altogether, these combinations suggest a possible common origin of dust particles at these sites, up to 10,300 km apart. Other combinations (not highlighted) are unique to one of the three sites. Some particles appear to be alloys rather than minerals, with many displaying no detectable oxygen or lower oxygen percentages than usual. Combinations missing from a given site are indicated in red.

| Baffin            | #  | %   | SC               | #  | %   | Russia     | #  | %   | Russia            | #  | %   |
|-------------------|----|-----|------------------|----|-----|------------|----|-----|-------------------|----|-----|
| NiFe              | 38 | 27% | NiFe             | 11 | 11% | NiFe       | 17 | 5%  | Al, low O2        | 8  | 2%  |
| FeCr              | 22 | 16% | FeCr             | 5  | 5%  | FeCr       | 27 | 7%  | FeAg              | 4  | 1%  |
| FeCrNi            | 20 | 14% | FeCrNi           | 6  | 6%  | FeCrNi     | 4  | 1%  | FeC               | 18 | 5%  |
| Fe, low O2        | 20 | 14% | Fe, low O2       | 0  | 0%  | Fe, low O2 | 77 | 21% | FeCd              | 2  | 1%  |
| Fe, native        | 10 | 7%  | Fe, native       | 8  | 8%  | Fe, native | 12 | 3%  | FeCoW             | 3  | 1%  |
| Ni, low O2        | 8  | 6%  | Ni, low O2       | 11 | 11% | Ni, low O2 | 2  | 1%  | FeCrV             | 12 | 3%  |
| FeCrNiCu          | 8  | 6%  | FeCrNiCu         | 0  | 0%  | FeCrNiCu   | 3  | 1%  | FeCrVW            | 38 | 10% |
| NiZn              | 6  | 4%  | NiZn             | 0  | 0%  | NiZn       | 2  | 1%  | FeCrW             | 13 | 4%  |
| Ni, native        | 2  | 1%  | Ni, native       | 20 | 20% | Ni, native | 0  | 0%  | FeCu              | 6  | 2%  |
| FeZn              | 2  | 1%  | FeZn             | 0  | 0%  | FeZn       | 1  | 0%  | FeCuTi            | 1  | 0%  |
| FeP               | 2  | 1%  | FeP              | 0  | 0%  | FeP        | 9  | 2%  | FeSi              | 2  | 1%  |
| FeO               | 2  | 1%  | FeO              | 2  | 2%  | FeO        | 3  | 1%  | FeTiW             | 9  | 2%  |
| FeNiCu            | 1  | 1%  | FeNiCu           | 0  | 0%  | FeNiCu     | 1  | 0%  | FeW               | 10 | 3%  |
| NiO               | 1  | 1%  | NiO              | 0  | 0%  | NiO        | 1  | 0%  | NiC               | 5  | 1%  |
| CuZn              | 0  | 0%  | CuZn             | 7  | 7%  | CuZn       | 6  | 2%  | NiCu              | 1  | 0%  |
| FeNiZn            | 1  | 1%  | FeNd             | 2  | 2%  | Ag, low O2 | 1  | 0%  | NiFe              | 2  | 1%  |
| <b>Total: 143</b> |    |     | FeNiNd           | 2  | 2%  | Ag, native | 21 | 6%  | NiP               | 4  | 1%  |
|                   |    |     | TiFeNi           | 20 | 20% | AgCrO      | 3  | 1%  | Si, native        | 1  | 0%  |
|                   |    |     | Zn, native       | 2  | 2%  | Cr, low O2 | 3  | 1%  | TiC               | 2  | 1%  |
|                   |    |     | ZnO              | 2  | 2%  | Cu, low O2 | 5  | 1%  | W, low O2         | 3  | 1%  |
|                   |    |     | <b>Total: 98</b> |    |     | Cu, native | 3  | 1%  | W, native         | 1  | 0%  |
|                   |    |     |                  |    |     | WC         | 7  | 2%  | WO                | 1  | 0%  |
|                   |    |     |                  |    |     | WCCo       | 7  | 2%  | WTi               | 1  | 0%  |
|                   |    |     |                  |    |     |            |    |     | <b>Total: 362</b> |    |     |

<https://doi.org/10.1371/journal.pone.0328347.t002>

## Oxygen isotope analysis of Baffin Bay microspherules

$\Delta^{17}\text{O}^*$  is a useful parameter in assessing the potential amount of extraterrestrial material in the drill cores. The deviation from the  $\Delta^{17}\text{O}^*$  terrestrial value, as defined by the obsidian standard, in all the Baffin Bay microspherules is negative, with an average value of  $-0.06 \pm 0.05$  ‰ (2SD). If this slight difference with the obsidian standard results from the presence of an extraterrestrial component, then meteoritic material lying above the Terrestrial Fractionation Line (TFL) (positive  $\Delta^{17}\text{O}^*$  values), including ordinary chondrites, R chondrites, and Martian samples, can be excluded. The microspherules that might have caused this slight deviation must lie below the TFL and will have originated from the common groups of carbonaceous chondrites, except for CI chondrites. CO and CM groups are relatively common in the meteoritic record and show significant deviations from the TFL in terms of their  $\Delta^{17}\text{O}^*$  values. Using the  $\Delta^{17}\text{O}^*$  value of  $-5.25$  ‰ (recalculated to a linear format from the data) [138] for CO fall Kainsaz (grade=3.2), the potential amount of carbonaceous chondrite input required to account for the  $-0.08$ ‰ deviation of Core 64 (286–290 cm) microspherules from the obsidian standard  $\Delta^{17}\text{O}^*$  value of  $0.00$  ‰ is approximately 1.5%. The maximum deviation of the  $\Delta^{17}\text{O}^*$  values from the obsidian standard obtained on the Baffin microspherules is only just outside the 2SD error on these analyses, and consequently, these results must

be viewed cautiously. However, the data obtained in this study do not preclude the possibility that at least some of the microspherules contain an extraterrestrial fraction of a few percent. More research is required into oxygen isotopic analyses of Baffin Bay MDPs to support our inferences of their origin as cometary dust.

### YDB spherule datum layer

The YDB microspherule layer has been identified at more than 60 stratigraphic sites, covering an area of >100 million km<sup>2</sup> across five continents [1,42,43,44,47,50,74–76,78,81,83,88,89,91–94,139–148]. Some critics have claimed that YDB impact proxies were not formed during impact events but rather by other processes that coincidentally deposited them simultaneously [98,100,106,149]. However, as reported by Kennett *et al.* [150], many known impact craters (notably including the K-Pg's Chicxulub crater) contain peak concentrations of the same YDB proxies, including platinum (e.g., in Chicxulub [151] and Clearwater East [152]), iridium (e.g., Chicxulub [151,153] and Clearwater East [152]), microspherules (e.g., Chicxulub [154] and Sudbury [154]), meltglass (e.g., Chicxulub [154] and Sudbury [154]), nanodiamonds (e.g., Chicxulub [155] and Ries [156]), carbon microspherules (e.g., Chicxulub [157]), and aciniform carbon/soot (e.g., Chicxulub [158,159] and Manson [160]). Although each of these proxies potentially can form through non-impact processes (e.g., anthropogenic, volcanism, and tectonism), this comprehensive proxy suite has been reported only in association with known or predicted craters/airbursts and at no other times in the geologic record [84,91]. Thus, there is broad acceptance that this group of proxies results from cosmic impact events, therefore representing a plausible explanation for the Baffin Bay assemblages.

### Nanoparticles

Nanoparticle data from SP-ICP-TOF-MS analysis of bulk core sediments reveal peaks in key elements (Pt, Ir, Ni, Co, Cr, and Cu) occurring within or slightly above the microspherule peaks (Figs 9–10, SI, Table S7, and Appendix B). The slight stratigraphic offset between the microspherules, CDPs, and key nanoparticle elements suggests delayed fallout of nanoparticles through the atmosphere and water column due to their smaller sizes, masses, and differential specific gravity or density. Elements with higher specific gravity or density (Pt and Ir) are concentrated contemporaneously or immediately above peaks in MSps and CDPs. Lower-density elements (Co, Cr, Cu) peak a few cm above the microspherule peak (Fig 7). Thus, the lighter, lower-density nanoparticles appear to have settled more slowly than the heavier nanoparticles and microspherules, perhaps due to a size-abundance correlation with the settling time. Such a delay is similar to that reported by Petaev *et al.* [78] for the Greenland ice core (GISP2) record, in which the YDB Pt anomaly persisted for ~23 years due to delayed atmospheric fallout of impact-related Pt-rich nanoparticles onto the Greenland ice sheet. Nanoparticles settling to the ocean floor were likely facilitated by incorporation into larger organic aggregates known as “marine snow,” the steady sinking of organic aggregates from shallow to deep ocean waters [161]. While we acknowledge that small amounts of the elements we discuss from the SP-ICP-TOF-MS data occur as natural terrestrial background enrichments and may derive from windblown dust from other continents, large peaks in specific elements common to ET material appear in the YDB layer and support a cosmic impact event.

### YDIH: environmental consequences of an impact event

The evidence observed at Baffin Bay, including anomalous abundances of microspherules, meltglass, platinum (Pt), and iridium (Ir), is also found at over 60 locations spanning more than 100 million km<sup>2</sup> across North and South America, Europe, Asia, and Africa [1,8–10,42,43,44,47–50,74–76,78–81,83,85,88,89,91,92,94,139–146,162–167]. Moore *et al.* [10] proposed an astronomical model that these YDB deposits were produced when Earth entered a debris stream originating from the disintegration of a large comet, the possible progenitor of Comet Encke and the Taurid Complex. This debris trail was likely wider than Earth's diameter and thousands of times longer. Earth's passage through the trail, which, depending

on many variables, likely occurred over a few hours to a few days, resulted in a “meteor hurricane or hailstorm” that loaded the upper atmosphere with millions of tonnes of terrestrial dust, cometary dust particles, soot, smoke, high-altitude ice crystals, and water vapor [1,10,121].

We propose that Earth’s passage through the impactor debris trail produced tens of thousands of airbursts and ground impacts. Some fragments exploded at high altitudes with little surface effects, while others exploded very close to the ground and are known as type-2 or touchdown airbursts [115,133,168,169]. These low-altitude airbursts generated high-velocity, high-temperature jets of vapor and fragments that reached Earth’s surface, causing significant damage and producing microspherules and meltglass randomly and discontinuously across at least one hemisphere. Meltglass is found at only about 10% of YDB sites, presumably because the airbursts were widely spaced, and the larger meltglass fragments did not travel far from ground zero. On the other hand, the smaller microspherules and nanoparticles traveled farther and have been observed at every site across five continents that were tested with sufficiently high stratigraphic/chronological resolution. See Fig 20 for the global distribution of YDB proxies.

### Baffin Bay Foraminifera and Paleoclimate across the YD

In core 52 at ~500 m depth in the Coburg Basin cross-shelf trough near Jones Sound, foraminiferal assemblages changed across the BA/YD boundary (see SI, Information, “Foraminifera: Radiocarbon Dating and Environmental Setting”, [https://zenodo.org/uploads/15330698]). Two samples lower in the core (biofacies 3A) are dominated by *Cassidulina neoteretis* and, to a lesser extent by *Stetsonia arctica* (SI, Table S18). Five overlying samples are dominated by *E. excavatum* (clavatum form), *Cassidulina reniforme* and *Buliminella hensoni* (biofacies 2). Samples above the YD interval are characterized by *C. neoteretis*, *Cibicides lobatulus* and *Nonionellina labradorica* (biofacies 3B). Foraminiferal assemblage changes are not sharp, likely due to physical reworking and bioturbation (SI, Table S18). Biofacies 2, characterizing the BA/YD boundary interval and above, contains abundant allochthonous material (sediments, including carbonate clasts, and foraminifera) likely transported by shallow meltwater plumes (see X-ray images in Figs 3, 4; SI, “Foraminifera: Radiocarbon Dating and Environmental Setting” [https://zenodo.org/uploads/15330698]; also Culver *et al.* unpublished). We cannot tell whether foraminiferal assemblages changed across the YD interval in other cores (64, 67 and 77) because all but two dated samples were taken within the YD interval (SI, “Foraminifera: Radiocarbon Dating and Environmental Setting”). Climate-related changes in sediments occur as regionally extensive deposits of IRD, which occur above and below the YD interval in cores 64, 67 and 77 (see Figs 3 and 4). These IRD-rich units [19,61] were deposited during the

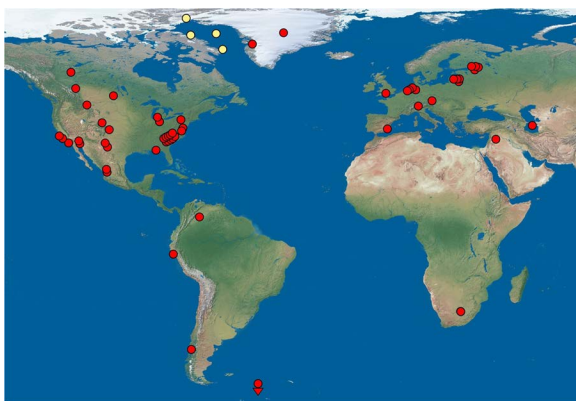

**Fig 20. YDB sites.** Various YDB proxies have been found at 60 sites on six continents, including Antarctica. Baffin Bay cores are in yellow, and other YDB sites are in red. The base map was provided by Tom Patterson ([www.shadedrelief.com](http://www.shadedrelief.com)).

<https://doi.org/10.1371/journal.pone.0328347.g020>

late Bølling–Allerød (BA) warm interval (dated at 14.1 to 13 ka) and during the immediately post-YD warming in the early Holocene (dated at 12.0–10.9) [170]. They do not occur in core 52 because this core is located north of the region of major IRD accumulation; the IRD unit immediately above the YD sediments in core 52 is considerably younger (SI, Table S18, [<https://zenodo.org/uploads/15330698>]).

The X-ray images of all four cores (Figs 3, 4) reveal distinct increases in carbonate-rich sediment with limestone clasts above the YDB impact peaks in microspherules and metallic dust particles, consistent with meltwater flooding following the YDB impact event. In addition, the YD climate interval in core 64 lacks foraminifera, consistent with rapid deposition of meltwater-transported sediments and IRD.

### Impact-related younger dryas climate changes

Consistent with the YDIH, we infer the following sequence of events, based on the sedimentary record in the four cores, including X-ray images (Figs 3, 4): *i)* At ~12,800 cal BP, Earth encountered a large comet's debris stream that loaded the atmosphere with inferred cometary material, including dust particles, high-altitude ice crystals, and water vapor. *ii)* The encounter resulted in numerous airbursts/impacts over land, ice sheets, and the oceans, injecting terrestrial dust, soot, and combustion aerosols into the atmosphere. *iii)* In Baffin Bay, these processes deposited YDB peaks in microspherules and metallic dust particles into laminated sediments containing minimal carbonate-rich material. *iv)* The airburst shockwaves and ice impacts destabilized ice sheet margins and collapsed ice dams on proglacial lakes, triggering meltwater flooding and iceberg calving into the Arctic and northern Atlantic Oceans [65,66,68,170]. Immediately above the YDB layer, the four cores display significant increases in meltwater-transported sediment and IRD, consisting of quartz grains, carbonate-rich sediment, limestone clasts, and lithic fragments pulverized by the glaciers. *v)* Atmospheric loading of dust, soot, and aerosols triggered a short-term impact winter. *vi)* Freshwater flooding into the Arctic and Atlantic led to decreased surface water salinity, disrupting oceanic thermohaline circulation and triggering the long-term YD cooling episode. *vii)* Feedback mechanisms and hysteresis extended the duration of YD cooling for ~1200 years until the onset of the Holocene when thermohaline circulation resumed its previous interglacial state.

The YDIH also proposes that soot generated by widespread biomass burning across approximately 10% of the planet, caused by airbursts and minor impacts, was an additional mechanism for YD cooling [75,76]. This effect, combined with the cooling impact of cometary dust, created a potent mechanism for rapid climate change [171].

Turco *et al.* [172] investigated the effects of dust and soot loading from nuclear warfare, estimating that fires from such events could produce  $105^6$  to  $290^6$  tons of atmospheric soot, triggering a prolonged nuclear winter lasting 1–3 years. Their modeled decline in temperatures parallels those observed at the onset of Younger Dryas. However, the amount of soot produced by nuclear warfare is several orders of magnitude smaller than the range of cometary dust particles modeled in this study, suggesting far more severe consequences at the YDB onset. Such quantities of cometary dust are capable of causing an “impact winter [173,174]” akin to the K-Pg impact event, where dust and soot injected into the atmosphere triggered abrupt global cooling.

Extrapolating from the influx of CDPs into four ocean cores from Baffin Bay, the global influx during ~6 months is estimated to be 8.8 million tons, most of which fell as micro- to nano-sized cosmic dust particles. The influx of MSp is estimated to be ~4.8 million tons, most of which is assumed to have been produced from surficial sediments during airbursts. The latter value is reasonably close (~2× less) to the 10 million tons of YDB MSp estimated by Wittke *et al.* [42] (See Appendix B, “Microspherule, CDP, and Nanoparticle Global Influx”).

### Future work

Additional oceanic and lacustrine cores from different locations around the globe need to be analyzed to test further the connection between YD cooling and the impact event. These potentially include further investigations in search of YDB



impact proxies along the drainage route from proglacial Lake Agassiz into the Beaufort Sea and along meltwater drainages through Hudson Strait and Nares Strait straight into Baffin Bay. Our plans include sampling and analyzing cores from the world's oceans, particularly the North Atlantic and Arctic oceans. In particular, we plan to focus on those cores that have independently identified the YD onset to further test the hypothesis that the YD began soon after the impact event.

## Conclusions

The Younger Dryas impact hypothesis (YDIH) posits that ~12,800 years ago, Earth entered a debris stream originating from the disintegration of a large comet, resulting in hemisphere-wide airbursts/impacts. This study supports the YDIH through the analysis of four marine piston cores from the Baffin Bay continental shelf to deep ocean depths (500–2,400 meters), spanning the YDB interval.

For the first time in YDB-dated sediments within glaciogenic marine sequences as much as 2,400 meters deep in Baffin Bay, we identify anomalous abundance peaks in iron-rich and silica-rich microspherules (microtektites and microkrystites) in association with high-temperature minerals, meltglass, cometary dust particles (CDPs), and PGE-rich nanoparticles (e.g., Pt and Ir). Impact proxies are found at variable depths in each core and are dated to the YD onset as determined by Bayesian age-depth modeling of calibrated radiocarbon dates. The study cores contain carbonate-rich, gravelly, sandy mud and indicate sporadic ice-rafting of detrital carbonate and gravel [19]. Depths of the YDB layer in study cores range from ~6.3 meters below the sediment-to-water interface (Core 52) at over 500 meters of water depth to 0.35 meters below the sediment-to-water interface (Core 67) at nearly 2,400 meters of water depth. YDB peaks in microspherules, CDPs, and PGE nanoparticles peaks are stratigraphically bracketed between well-defined and dated IRD layers.

Bayesian age-depth models (SI, Figs S3–S6, [https://zenodo.org/uploads/15330698]) suggest increasing sedimentation rates in some cores at the YD onset (none in cores 52 and 77; ~3.7x in core 64, and ~5.2x in core 67). This increase may have been in response to the collapse of the Northern Baffin Bay Ice Shelf just before the start of YD cooling [60] and to the subsequent increase in carbonate-rich sediment and IRD deposition just after the YD onset. This increase in the sedimentation rate, combined with the delayed settling of nanoparticles, is most likely responsible for the slight stratigraphic separation between heavier YDB microspherules and much lighter nanoparticles (Figs 9 and 10 and SI, Figs S7 and S8, [https://zenodo.org/uploads/15330698]).

Analyses of the elemental chemistry of Baffin microspherules indicate that they are microtektites and/or microkrystites [134,136] mainly composed of melted terrestrial material with minor amounts of ET impactor material (<~2 wt%) [15–18]. Such microtektites and microkrystites are known to have been deposited as proximal or distal ejecta from ET impacts and touchdown airbursts [13,14,114,115].

We compare and contrast several possible origins for the Baffin Bay microspherules but rule out or exclude (a) meteoritic ablation or cosmic influx (eliminated due to low MgO content, which is typically highly enriched in stony meteorites) [116]; (b) mantle material (excluded as mantle processes do not produce microspherules) [42,47]; (c) volcanic activity (eliminated due to the absence of tephra and sulfur) [75,76]; (d) wildfires (temperatures insufficient for formation) [42,117]; (e) anthropogenic sources (excluded by core depth and location). These findings counter claims that YDB impact proxies are industrial or anthropogenic contaminants, as some critics argue [109]. (f) Based on the evidence, this leaves only an extraterrestrial impact (ET) impact as the most likely source.

Microspherules are geochemically most similar to terrestrial sediments with traces of ET material. As discussed for other YDB sites in North America [11], anomalous peak abundances of microspherules, CDPs, and platinum reported here for Baffin Bay represent an example of an “impact microspherule datum layer,” as proposed by Simonson and Glass [136]. This YDB datum layer has already demonstrated utility in numerous terrestrial archaeological sites as a chronostratigraphic marker dated at 12.8ka [11,50,86].

Thus, the results of this study support the YDIH, suggesting that Earth's encounter and interaction with a large comet and its debris trail at the YD onset led to major climatic and environmental changes. YDIH proponents also have

implicated these changes as a major contributing factor in the megafaunal extinctions and the collapse of the Clovis technocomplex in North America at the YD onset. Confirming the impact hypothesis requires further research and global comparisons with other oceanic and lacustrine sediment records.

## Methods

### Sample collection

Literature and data already available for each Baffin Bay core, including dating, magnetic susceptibility, elemental composition, and IRD load, were examined to determine the likely depth of the Younger Dryas Boundary [19,20]. Sections of the core were then sampled in approximately 1–5 cm thick quarter core sections with mass amounting to approximately 18–53 grams each. Differences in the sedimentary composition, IRD load, and the amount of each core remaining after prior sampling limited the finding of a commonality in the depth and mass of each sample. Each sample taken was placed in a container about the size of a 35 mm film canister. Each sample mass was first homogenized and then cut into equal portions for different teams to process and examine based on their specialized analysis capability. The included foraminifera dating, microspherule and melt glass, nanoparticle and single particle ICP-TOF-MS, and laser ablation IC-MS.

### Microspherules, CDP, and meltglass analysis

To analyze sediment samples for microspherule, CDP, and meltglass candidates, we first weighed the core samples and then subjected them to 30 minutes of ultrasonication using a dispersant, sodium metaphosphate, to disaggregate the sediments. After ultrasonication, the samples were wet-sieved over a 20-micron sieve and dried under a heat lamp. The processed samples were then size sorted, and sediment fractions between  $\geq 63$  and  $< 125$  microns and between  $\geq 20$  and  $< 63$  microns were spread thinly on a large sheet of paper. A neodymium magnet, placed inside a plastic bag, was slowly moved over the size-sorted sediment fractions to extract the magnetic grains. This process is repeated three times to ensure the extraction of most magnetic grains. The extracted grains were then examined under a stereo binocular microscope to identify potential microspherules, CDP, and meltglass candidates. The non-magnetic fraction was also examined under an optical microscope for the presence of meltglass and silica-rich microspherules not attracted to the magnet. When such candidates were present, they were placed on carbon SEM tape for further analysis using SEM and EDS (JEOL 6010 Plus LV). Only SEM and EDS analysis could confirm the identification of silica-rich or Fe-rich microspherules [43]. The microspherule counts and total sediment sample weights were used to estimate the number of microspherules per kilogram for each sample.

After extracting the magnetic fraction to investigate iron-enriched microspherules and candidate CDPs, the remaining sand fraction was examined for meltglass candidates. This aliquot primarily included larger sand size fractions ( $> 63$  microns), which were examined using optical microscopy to identify meltglass. When meltglass candidates were found, they were placed on carbon SEM tape for SEM and EDS analysis. Per kg abundance values of microspherules and meltglass generally depend on the total mass of the sample tested. The smaller the mass and the fewer the proxies, the more difficult it becomes to find and accurately estimate the normalized proxy abundance.

### Laser ablation inductively coupled mass spectrometry

Laser ablation on microspherules was conducted at the Center for Elemental Mass Spectrometry (CEMS), University of South Carolina. Element concentrations were determined using a Photon Machines UV-Eximer 193 nm laser ablation system with a HELIX 2 sample cell in a He atmosphere, coupled to a Thermo ELEMENT 2 High-Resolution ICP-MS. Concentrations were determined by spot ablation with a 40–50  $\mu\text{m}$  spot at 8 Hz and  $\sim 11$  J/cm<sup>2</sup> fluence.

Relevant laser and ICPMS parameters can be found in Frisby *et al.* [175]. Microspherules were handpicked and mounted on glass slides with tape. Each spot was ablated for ~ 20 seconds. Tests were conducted to determine the potential overlap of the beam with the tape and the signals generated by ablating tape or glass slide. Each ablation spot data was manually screened for the potential of the beam to obliterate the specimen and hit the underlying tape. In those cases, only the portion of the signal from the unknown spot was used for reduction. We monitored masses  $^{23}\text{Na}$ ,  $^{27}\text{Al}$ ,  $^{25}\text{Mg}$ ,  $^{29}\text{Si}$ ,  $^{43}\text{Ca}$ ,  $^{47}\text{Ti}$ ,  $^{51}\text{V}$ ,  $^{53}\text{Cr}$ ,  $^{55}\text{Mn}$ ,  $^{57}\text{Fe}$ ,  $^{59}\text{Co}$ ,  $^{60}\text{Ni}$ ,  $^{63}\text{Cu}$ ,  $^{66}\text{Zn}$ ,  $^{85}\text{Rb}$ ,  $^{88}\text{Sr}$ ,  $^{89}\text{Y}$ ,  $^{90}\text{Zr}$ ,  $^{93}\text{Nb}$ ,  $^{98}\text{Mo}$ ,  $^{99}\text{Ru}$ ,  $^{101}\text{Ru}$ ,  $^{103}\text{Rh}$ ,  $^{105}\text{Pd}$ ,  $^{106}\text{Pd}$ ,  $^{137}\text{Ba}$ ,  $^{139}\text{La}$ ,  $^{140}\text{Ce}$ ,  $^{146}\text{Nd}$ ,  $^{149}\text{Sm}$ ,  $^{157}\text{Gd}$ ,  $^{163}\text{Dy}$ ,  $^{167}\text{Er}$ ,  $^{172}\text{Yb}$ ,  $^{178}\text{Hf}$ ,  $^{185}\text{Re}$ ,  $^{192}\text{Os}$ ,  $^{193}\text{Ir}$ ,  $^{195}\text{Pt}$ ,  $^{208}\text{Pb}$ ,  $^{232}\text{Th}$ ,  $^{238}\text{U}$ . Data reduction was performed manually following Frisby *et al.* [175] and Humayun *et al.* [176]. As the microspherules were similar in size to the laser beam, they were obliterated during measurement. Each spot data scan was manually inspected, and only the parts of the scan that ablated the microspherules and not the substrate were used for reduction. As we did not know *a priori* if the microspherules were homogenous in terms of metals, we used the total beam signal for each element and for each microspherule to calculate concentrations. Gas blank was subtracted from each analysis. We used a combination of laser ablation standards and reference materials (NIST SRM612; BCR-2G and BIR-1G reference material from the United States Geological Survey) to quantify the Relative Sensitivity Factors (RSF) and metal content in MSp and the platinum group elements (see also Humayun *et al.* [176]). For the metal microspherules, we assumed Fe is 99% by weight of each spot, and the rest of the elements are calculated by ratioing the intensities to  $^{57}\text{Fe}$ . This assumption is validated *posteriori* by looking at the sum of all element concentrations. The sum of metals in the microspherules analyzed (SI, Table S5) is 99.4 to 100.7%, confirming our assumption to be within 2% total. The uncertainties of the microspherule concentrations cannot be estimated as we used the total ablation signal per analysis, therefore, any “spikes” in the laser data are taken as part of the analyzed microspherule and were not excluded as outliers. Moreover, as the microspherules were obliterated during ablation, there was no opportunity for duplicates.

## Oxygen isotopes

High-precision oxygen isotopic measurements were undertaken at the Open University (Milton Keynes, UK) using an infrared laser-assisted fluorination system [177,178]. For each core sample, whole-rock powders were prepared from chips of drill core material with a minimum mass of 100 mg. Approximately 2 mg aliquots of these powders were then loaded into a nickel sample block, along with similar-sized aliquots of our internal obsidian standard [54]. The loaded sample block was then placed in a two-part chamber, made vacuum-tight using a compression seal with a copper gasket and quick-release KFX clamp [177]. A 3 mm thick  $\text{BaF}_2$  window at the top of the chamber allows simultaneous viewing and laser heating of samples. Prior to analysis, the sample chamber was heated overnight under vacuum to a temperature of about 70°C to remove the majority of the adsorbed moisture. After overnight heating, the chamber was allowed to cool to room temperature. A static leak check was then undertaken to verify that the system was vacuum-tight. The system blank was then reduced further by introducing aliquots of  $\text{BrF}_5$ . These were held in the sample chamber for 20 minutes and had the effect of removing any remaining adsorbed moisture. The system was then left to pump for another day and oxygen isotopic analysis only undertaken once the blank level reached <60 nanomoles of  $\text{O}_2$ . Sample heating in the presence of  $\text{BrF}_5$  was undertaken using an integrated 50W infrared  $\text{CO}_2$  laser (10.6  $\mu\text{m}$ ) and video system mounted on an X-Y-Z gantry supplied by Photon Machines Inc. After fluorination, the released  $\text{O}_2$  was purified by passing it through two cryogenic nitrogen traps and over a bed of heated KBr to remove any excess fluorine. The isotopic composition of the purified oxygen gas was analyzed using a Thermo Fisher MAT 253 dual inlet mass spectrometer with a mass resolving power of approximately 200.

Overall system precision, as defined by replicate analyses of our internal obsidian standard is:  $\pm 0.053\text{‰}$  for  $\delta^{17}\text{O}$ ;  $\pm 0.095\text{‰}$  for  $\delta^{18}\text{O}$ ;  $\pm 0.018\text{‰}$  for  $\Delta^{17}\text{O}$  ( $2\sigma$ ) [54]. Oxygen isotopic analyses are reported in standard  $\delta$  notation, where  $\delta^{18}\text{O}$  has been calculated as:  $\delta^{18}\text{O} = [({}^{18}\text{O}/{}^{16}\text{O})_{\text{sample}}/({}^{18}\text{O}/{}^{16}\text{O})_{\text{VSMOW}} - 1] \times 1000$  (‰) and similarly for  $\delta^{17}\text{O}$  using

the  $^{17}\text{O}/^{16}\text{O}$  ratio.  $\Delta^{17}\text{O}$ , which represents the deviation from the terrestrial fractionation line, has been calculated using the linearized format of Miller [179]:

$$\Delta^{17}\text{O} = 1000 \ln(1 + (\delta^{17}\text{O}/1000)) - \lambda 1000 \ln(1 + (\delta^{18}\text{O}/1000)) \text{ where } \lambda = 0.5247$$

### Single particle inductively coupled plasma time-of-flight mass spectrometry (SP-ICP-TOF-MS)

**Particle extraction.** For particle extraction, 100 mg of bulk sediment samples were suspended in 10 mL of ultrapure water (UPW, Millipore Advantage System, Merck Millipore, Darmstadt, Germany) in 15 mL acid-washed centrifuge tubes. The sediment suspensions were vortexed using a vortex mixer (Scientific Industries, G560, USA), followed by 15 minutes of batch sonication (Branson 2800, 40 kHz, Danbury, CT, USA) to disperse the particles. After sonication, the samples were left undisturbed for 24 hours to allow larger particles to settle. The top 5 mL supernatant was then transferred into acid-washed 15 mL centrifuge tubes and stored in a refrigerator at 4 °C before single particle-inductively coupled plasma-time of flight-mass spectroscopy (SP-ICP-TOF-MS) analysis. Just before SP-ICP-TOF-MS analysis, the samples were diluted 5000-fold in UPW, and the suspensions were sonicated both before and after dilution to enhance particle dispersion and minimize settling during analysis.

**Particle composition on a single-particle basis.** The elemental composition of individual particles was determined by SP-ICP-TOF-MS (TOFWERK, Thun, Switzerland), following methods described in our previous studies [180–182]. Samples were introduced into the ICP using a 2DX autosampler (Element Scientific, Omaha, United States) and a Micro-Mist U-series Nebulizer (Thermo Scientific, USA) connected to a Quartz Cyclonic Spray Chamber (Meinhard, USA) and then into the ICP torch. Instrument operating parameters and monitored isotopes are detailed in SI, Tables S14 and S15 (<https://zenodo.org/uploads/15330698>), respectively. Element-specific instrument sensitivities were measured with multi-element solutions prepared from a mixed multi-element ICP certified reference standard (0, 1, 2, 5, and 10 µg/L multi-element standard, diluted in 1% HNO<sub>3</sub>, BDH Chemicals, Radnor, PA, USA). Transport efficiency was calculated using the known size method with certified 60-nm Au ENMs (NIST RM 8013 Au, Gaithersburg, MD, USA) and a series of ionic Au standards (BDH Chemicals, West Chester, PA, USA) [183].

A 4.5% H<sub>2</sub>/He gas mixture was used as collision gas to eliminate or minimize interferences, optimized specifically for  $^{56}\text{Fe}^+$  and  $^{28}\text{Si}^+$  signals. Data processing, including signal thresholding (using the Poisson algorithm [184]) and split-event correction, was conducted using TOFpilot (Version 2.11.3, TOFWERK, Thun, Switzerland). The mass and size detection limits, assuming pure metal and metal oxide phases, are provided in SI, Table S14 (<https://zenodo.org/uploads/15330698>). All samples and UPW blanks were analyzed in triplicate, and data were acquired for 200 seconds per replicate. After confirming the reproducibility of single particle elemental composition and number concentrations among replicates, the data from the three replicates were combined to achieve comprehensive analysis due to limited detection events of certain elements.

### Inclusivity in global research

Additional information regarding the ethical, cultural, and scientific considerations specific to inclusivity in global research is included in the Supporting Information (see SI, “Inclusivity in global research”).

### Ethical considerations, permits, and authorship

The curator/collections manager at the National Marine Geoscience Collection at the Bedford Institute of Oceanography in Dartmouth, Nova Scotia, approved this study.



## Appendix A

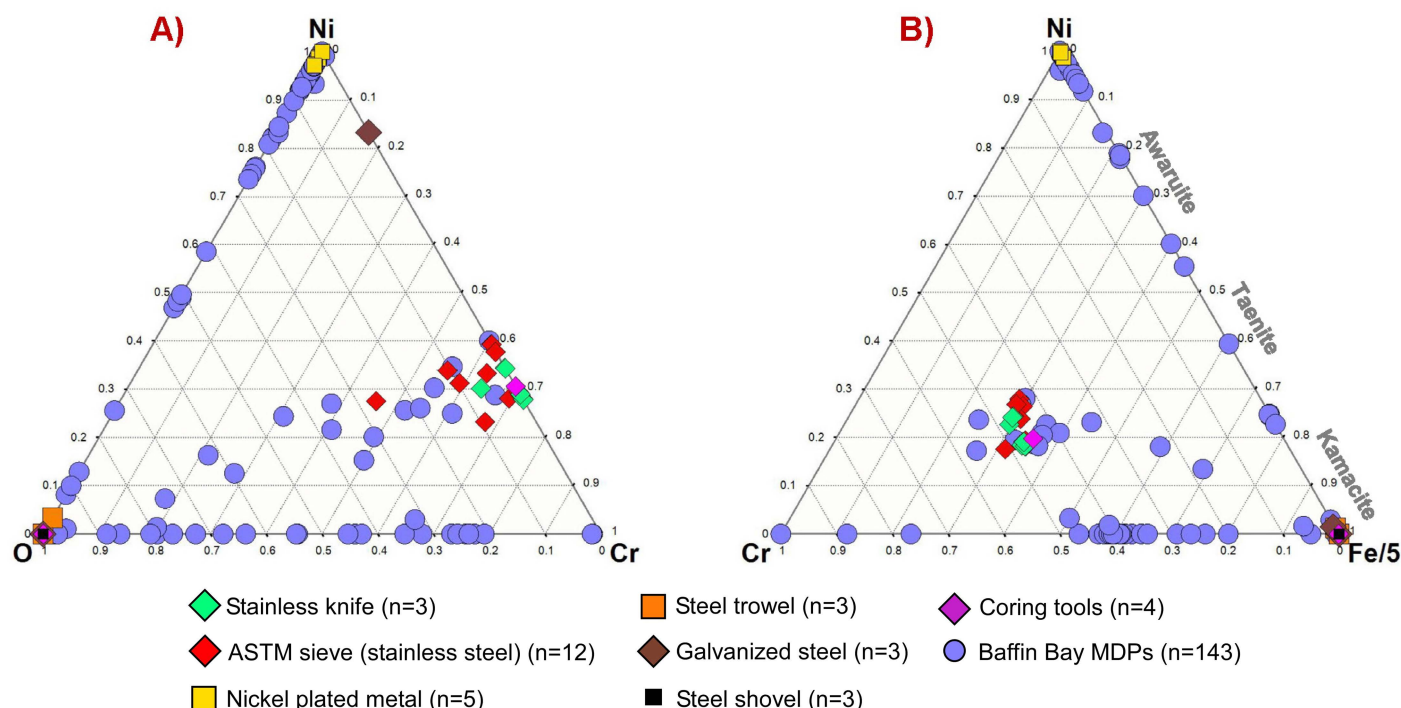

**Appendix Fig A1. Ternary plot for Baffin Bay.** metallic dust particles (MDPs) and potential sources of anthropogenic contaminants. Most Baffin MDPs do not overlap with anthropogenic/industrial metallic particles, which typically group at the vertices. Clusters of nearly pure nickel-plated neodymium magnet coatings overlap with some MDPs, but contamination is unlikely because the magnets were shielded from the sample. Alternatively, cometary material can contain blebs of native nickel and native iron. a) O-Cr-Ni plot. Some MDPs in the middle of the plot display similar ratios of Cr to Ni but with highly variable amounts of oxygen. Most are inconsistent with the plotted contaminants and, thus, are likely to be terrestrial or ET chromite grains. b) Cr-Fe-Ni plot. The Fe abundances were divided by 5 to increase the clarity of the plot. Note that the contaminants are grouped at the vertices on the righthand Fe-Ni axis, and none overlap the MDPs along the rest of the axis. The axis is marked to show awaruite (~77 wt% Ni), taenite (~20–65 wt% Ni), and kamacite (5–10 wt% Ni), which are very rare terrestrially but common in ET material, supporting the conclusion that these are ET particles. The ternary plot was made using ProSim Ternary Diagram software. See SI, Table S13 for data (<https://zenodo.org/uploads/15330698>).

<https://doi.org/10.1371/journal.pone.0328347.g021>

## Appendix Table A1. Oxygen isotope results.

|                              | $\delta^{17}\text{O}_{\text{‰}}$ | 1SD  | $\delta^{18}\text{O}_{\text{‰}}$ | 1SD  | $\Delta^{17}\text{O}_{\text{‰}}^{**}$ | 1SD  |
|------------------------------|----------------------------------|------|----------------------------------|------|---------------------------------------|------|
| Obsidian – internal standard | 3.67                             | 0.02 | 7.01                             | 0.01 | 0.00                                  | 0.02 |
| Obsidian – internal standard | 3.81                             | 0.05 | 7.28                             | 0.00 | 0.00                                  | 0.04 |
| Obsidian – internal standard | 3.80                             | 0.00 | 7.27                             | 0.01 | –0.01                                 | 0.00 |
|                              |                                  |      |                                  |      |                                       | 2SD  |
|                              |                                  |      |                                  | MEAN | –0.01                                 | 0.01 |
| Core 64 272–274 cm           | 5.16                             | 0.03 | 10.06                            | 0.01 | –0.11                                 | 0.03 |
| Core 64 286–290 cm           | 5.77                             | 0.02 | 11.18                            | 0.04 | –0.08                                 | 0.03 |
| <b>Core 64 312–318 cm</b>    | 7.44                             | 0.01 | 14.37                            | 0.03 | –0.07                                 | 0.03 |
| Core 64 323–325 cm           | 7.27                             | 0.02 | 13.99                            | 0.01 | –0.05                                 | 0.03 |
| Core 67 25–26 cm             | 6.14                             | 0.07 | 11.84                            | 0.06 | –0.06                                 | 0.04 |

|                         | $\delta^{17}\text{O}_{\text{‰}}$ | 1SD  | $\delta^{18}\text{O}_{\text{‰}}$ | 1SD  | $\Delta^{17}\text{O}_{\text{‰}}^{**}$ | 1SD  |
|-------------------------|----------------------------------|------|----------------------------------|------|---------------------------------------|------|
| Core 67 26–28 cm        | 5.60                             | 0.01 | 10.75                            | 0.02 | −0.02                                 | 0.01 |
| Core 67 28–30 cm        | 5.47                             | 0.04 | 10.57                            | 0.02 | −0.06                                 | 0.03 |
| Core 67 30–32 cm        | 5.82                             | 0.02 | 11.16                            | 0.00 | −0.02                                 | 0.02 |
| <b>Core 67 32–35 cm</b> | 6.10                             | 0.02 | 11.71                            | 0.01 | −0.03                                 | 0.02 |
| Core 67 35–36 cm        | 5.88                             | 0.00 | 11.34                            | 0.02 | −0.06                                 | 0.01 |
|                         |                                  |      |                                  |      |                                       |      |
|                         |                                  |      |                                  |      |                                       | 2SD  |
|                         |                                  |      |                                  | MEAN | −0.06                                 | 0.05 |

\*\*linearized slope=0.5247

<https://doi.org/10.1371/journal.pone.0328347.t003>

## Appendix B

### Microspherule, CDP, and Nanoparticle Global Influx

For particles falling through the atmosphere, fallout times are highly variable depending on particle size and atomic weight. J. Kasten [185] and Grainger et al. [186] give the velocity of various-sized particles (or see Fig 2 of Grainger et al. [185]). At an altitude of 30 km, 20- $\mu\text{m}$  particles have a falling speed of 1 cm/s, or almost a kilometer a day, thus taking ~30 days to fall out. Micron-sized particles have a falling speed of about 0.1 mm/s at an altitude of 15 km, taking ~2–3 years to reach the ground. Nanometer-sized particles could likely take many years to decades to fall out, consistent with the results of Petaev et al. [78], who reported a 20-year window of continuous YDB Pt deposition in the GISP2 ice core. For influx estimations, we assume an average fallout time of 6 months for all particles, even though the fallout time range spanned hours to years.

**Microspherule Influx.** We infer the YDB event to have been global or near-global. This assumption is based on (i) the identification of YDB proxies at ~60 sites across six continents and (ii) the modeling of Rafizadeh and Vempolu [187], who calculated that during Earth's encounter with the trail of a 100-km comet, ~35% of fragments would be captured into Earth orbit, forming a near-spherical shell around the planet. The influx of MSp is estimated to be ~4.8 million tonnes, most of which is assumed to have been produced from surficial sediments during airbursts (Table B1). The latter value is reasonably close (~2 $\times$  less) to the 10 million tonnes of YDB MSp estimated by Wittke et al. [42]

**Table B1. Analysis of YDB Microspherule (MSp) Influx.** This table analyzes the estimated influx of microspherules (MSp) globally using the data from Baffin Bay cores. Based on an average diameter of 64  $\mu\text{m}$  and an estimated number per layer ( $n=20$ ) from Baffin cores, the flux of YDB microspherules is estimated to be ~4.8 million metric tonnes, assuming a 6-month atmospheric fallout time, potentially extending to several years for smaller MSp. This estimate represents ~1849 times the typical 6-month flux rate of cosmic material of all diameters to Earth, estimated at 5200 tonnes/yr [29]. These values are ~6 $\times$  lower than, yet comparable to, predictions ranging from 400 to 30 million tonnes of cosmic dust expected from a ~100-km diameter disintegrating comet in a short-period orbit [6]. The estimated mass of MSps deposited globally (~4.8 million metric tonnes) constitutes a minute percentage (0.0000009%) of the mass of a 100-km-wide comet. For this analysis, we assume that: 1) the comet was ~100 km in diameter; 2) the compositions of MSps are homogeneous with an average density of 50 wt% SiO<sub>2</sub> and 50 wt% Fe for mass calculations; 3) all particles entered Earth's atmosphere over 24 hours and depending upon their size and density, took about 6 months to be deposited into Baffin Bay; and 4) concentrations and mass values in Baffin Bay are representative of those across the entire planet. Justification for assumption #4 comes from Wittke et al. [42], who estimated that ~10 million tonnes of melted microspherules were deposited at the YDB over 50 million square kilometers on four

continents, suggesting global or hemispheric deposition of YDB impact proxies. Of the MSp, only approximately 2% by weight are inferred to be cosmic in origin, with most suggested as melted target rocks from YDB airbursts and impacts. These calculations have significant uncertainties.

| Microspherules (MSp)                                       | Value           |
|------------------------------------------------------------|-----------------|
| Average diam. ( $\mu\text{m}$ ); range 4–163 $\mu\text{m}$ | 64              |
| Average # of microspherules per YDB layer                  | 20              |
| Average mass of 75 Baffin Bay microspherules (g)           | 4.24E-07        |
| Total mass of microspherules per YDB layer (g)             | 8.48E-06        |
| Surface area of samples collected ( $\text{cm}^2$ )        | 9               |
| Area of Earth ( $\text{cm}^2$ )                            | 5.10E + 18      |
| Ratio of Earth $\text{cm}^2$ ÷ Baffin Bay $\text{cm}^2$    | 5.67E + 17      |
| Total mass of microspherules on Earth (g)                  | 4.81E + 12      |
| Number of g per metric ton (g/mt)                          | 1.0E + 06       |
| <b>Influx of Microspherules (# mt/ 6 mos)</b>              | <b>4.81E+06</b> |

<https://doi.org/10.1371/journal.pone.0328347.t004>

The hypothetical debris swarm modeled here encounters Earth at 30 km/s and consists of dust, pebbles, and boulders, as seen in the satellite infrared of the Comet Encke trail and in showers from the Taurid Complex. Fragments up to approximately 100 meters would be ablated in the mesosphere [6,120,123]. However, this ablated material would likely be nanoscale and go undetected in the core samples during optical microscopy or SEM analysis, and thus, CDP flux estimates are not included in this study.

A comparison can be drawn between the global estimate from the YDB based on Baffin Bay results and the current annual influx of cosmic debris. Micrometeorites collected over the years at Dome C in Antarctica indicate a yearly influx of  $5200 \pm 1500$  metric tonnes (range: 3700–6700) [29] (Table B2). Various satellite studies support this figure, although it fluctuates over time due to encounters with meteor streams, either cometary or asteroidal in origin. The estimated flux for Baffin Bay is approximately three orders of magnitude higher than the current background flux. The most plausible explanation for such a high flux rate is that Earth encountered a dense comet stream [6,120–123], resulting in the YDB impact event, as proposed by the YDIH.

**CDP Influx.** Extrapolating from the influx of CDPs into four ocean cores from Baffin Bay, the global influx during ~6 months is estimated to be 8.8 million tons, most of which fell as micro- to nano-sized cosmic dust particles (Table B2).

**Table B2. Analysis of YDB Cosmic Dust Particle (MDP) Influx:** The table analyzes the estimated influx of CDPs globally based on data from Baffin Bay cores. Based on an average diameter of 30  $\mu\text{m}$  and an estimated number per layer ( $n=30$ ) from Baffin cores, the global flux of CDPs is ~8.8 million metric tons, assuming a 6-month atmospheric fallout time, potentially extending to several years for smaller CDPs. This estimate represents ~3390 times the typical 6-month flux rate of cosmic material to Earth, estimated at 5200 tons/yr [29]. These values are ~3× lower than, but still comparable to predictions ranging from 400 to 30 million tons of cometary dust expected in the trail of a 100-km diameter disintegrating comet in a short-period orbit [6]. For this analysis, we assume that 1) all particles were homogeneous with an average density of Fe; 2) all particles were introduced to Earth's atmosphere during 24 hours but most likely took 6 months to be deposited into Baffin Bay; 3) concentrations and mass values in Baffin Bay are representative of the entire planet and; 4) the diameter of the YDB comet was a 100 km. Justification for assumption #3 comes from Wittke et al.[42], who estimated ~10 million tons of melted microspherules were deposited at the YDB over 50 million square kilometers on four

continents, suggesting global, near-global, or hemispheric deposition of YDB impact proxies, including CDPs. These calculations are estimations with large, inherent uncertainties.

| Cosmic Dust Particles (MDPs)                               | Value             |
|------------------------------------------------------------|-------------------|
| Average diam. ( $\mu\text{m}$ ); range 5–100 $\mu\text{m}$ | 30                |
| Average # of particles per YDB layer (#)                   | 30                |
| Average mass of 24 Baffin particles, MDPs (g)              | 5.2E-07           |
| Total mass of particles per YDB layer (g)                  | 1.5547E-05        |
| Surface area of samples collected ( $\text{cm}^2$ )        | 9                 |
| Area of Earth ( $\text{cm}^2$ )                            | 5.10E + 18        |
| Total mass of particles on Earth (g)                       | 8.81E + 12        |
| Number of g per metric ton (g/mt)                          | 1.0E + 06         |
| <b>Influx of Cosmic Dust Particles (mt/ 6 mos)</b>         | <b>8.81E + 06</b> |
| Estimated annual influx of cosmic dust                     | 5200              |
| Estimated influx of cosmic dust (mt/ 6 mos)                | 2600              |
| <b>Ratio of YDB flux ÷ Earth flux</b>                      | <b>3390</b>       |
| Comet mass, 100-km (mt)                                    | 5.2E + 14         |
| Ratio of YDB mass to the comet (g)                         | 1.68E-08          |
| Percent of 100-km comet                                    | 1.68E-06          |
| <b>Percent of 100-km comet</b>                             | <b>0.000002</b>   |

<https://doi.org/10.1371/journal.pone.0328347.t005>

**Nanoparticle Influx.** Baffin core enrichments of nanoparticles indicate that elements with higher density (Pt and Ir) are concentrated contemporaneously or immediately above the microspherules peak. Lower-density elements (Co, Cr, Cu) peak a few cm above the microspherule peak (see Figs 9 and 10). This phenomenon is likely attributed to the prolonged settling time of nanoparticles in both the atmosphere and water column, which contrasts with the more rapid settling of denser microspherules. The estimated influx of YDB nanoparticles ranges from 6800 to 3400 tonnes, exceeding the normal daily flux rate of cosmic material by >200–400 times (Table B3).

**Table B3. Analysis of YDB Nanoparticle Influx.** We calculated the mass of YDB NPs that exceed background concentrations. The estimated flux of YDB nanoparticles ranges from 6800 to 3400 tonnes within 24 hours, representing >200–400 times the normal daily flux rate of all cosmic material, estimated at 5200 tonnes/yr [29]. For this analysis, we made the following simplistic assumptions: 1) the nanoparticles are homogeneous, 2) all nanoparticles were introduced to Earth's atmosphere over a duration of 24 hours but probably took considerably longer to fall out into Baffin Bay, and 3) concentrations and mass values in Baffin Bay are representative of the entire planet. These calculations have large uncertainties but serve as a useful model to understand the potential flux of cosmic material to Earth at the YD onset.

| Nanoparticles, description                               | Value       | Value       |
|----------------------------------------------------------|-------------|-------------|
| Average excess mass of Baffin Bay nanoparticles (g)      | 2.4e-10     | 1.2e-10     |
| Average number of nanoparticles per YDB layer            | 2.10e + 11  | 2.10e + 11  |
| Surface area of samples collected ( $\text{cm}^2$ )      | 9           | 9           |
| <b>Flux of nanoparticles for one hemisphere (mt/day)</b> | <b>6800</b> | <b>3400</b> |
| Estimated annual influx of cosmic dust (mt/yr)           | 5200        | 5200        |



| Nanoparticles, description                                | Value      | Value      |
|-----------------------------------------------------------|------------|------------|
| Estimated daily influx of cosmic dust (mt/day)            | 14.25      | 14.25      |
| <b>Ratio of Baffin Bay nanoparticle flux ÷ Earth flux</b> | <b>477</b> | <b>239</b> |

<https://doi.org/10.1371/journal.pone.0328347.t006>

## Acknowledgments

We greatly appreciate help with this project from Kate Jarrett and D.J.W. Piper at the National Marine Geoscience Collection at the Bedford Institute of Oceanography in Dartmouth, Nova Scotia. We thank Mark J. Brooks and Peter R. Parham for providing valuable comments on the manuscript. Additionally, we are grateful for the use of the SEM facilities at Elizabeth City State University, the CAMCOR facilities at the University of Oregon, and the Electron Microscopy and Surface Analysis Laboratory at the University of Utah, along with assistance from EDAX, LLC. The authors used ChatGPT (OpenAI, GPT-4) to assist with language refinement and clarity improvements during manuscript preparation, in compliance with PLOS ONE's guidelines. Core samples for this study are mostly depleted, but limited amounts may be available from the Corresponding Author.

## Author contributions

**Conceptualization:** Christopher R. Moore, Vladimir A. Tseltovich, Malcolm A. LeCompte, Allen West.

**Formal analysis:** Christopher R. Moore, Malcolm A. LeCompte, Allen West, Mohammed Baalousha, James P. Kennett, Michael Bizimis, Victor Adediji, Seth R. Sutton, Gunther Kletetschka, Kurt A. Langworthy, Jesus P. Perez, Jordan Jeffries, Richard C. Greenwood, James A. Malley, Mahbub Alam.

**Investigation:** Christopher R. Moore, Allen West, Stephen J. Culver, David J. Mallinson, Mohammed Baalousha, James P. Kennett, Victor Adediji, Seth R. Sutton, Gunther Kletetschka, Timothy Witwer, Jordan Jeffries, Mahbub Alam.

**Methodology:** Christopher R. Moore, David J. Mallinson, James P. Kennett, William M. Napier, Victor Adediji, Kurt A. Langworthy, Jesus P. Perez, Richard C. Greenwood.

**Project administration:** Christopher R. Moore.

**Supervision:** Vladimir A. Tseltovich.

**Writing – original draft:** Christopher R. Moore, Vladimir A. Tseltovich, Malcolm A. LeCompte, Allen West, Stephen J. Culver, David J. Mallinson, Mohammed Baalousha, James P. Kennett, William M. Napier, Michael Bizimis, Victor Adediji, Gunther Kletetschka, Marc D. Young, Richard C. Greenwood.

**Writing – review & editing:** Christopher R. Moore, Vladimir A. Tseltovich, Malcolm A. LeCompte, Allen West, Stephen J. Culver, David J. Mallinson, Mohammed Baalousha, James P. Kennett, William M. Napier, Michael Bizimis, Gunther Kletetschka, Marc D. Young.

## References

1. Firestone RB, West A, Kennett JP, Becker L, Bunch TE, Revay ZS, et al. Evidence for an extraterrestrial impact 12,900 years ago that contributed to the megafaunal extinctions and the Younger Dryas cooling. *Proc Natl Acad Sci U S A*. 2007;104(41):16016–21. <https://doi.org/10.1073/pnas.0706977104> PMID: 17901202
2. Steel DI, Asher DJ. The orbital dispersion of the macroscopic Taurid objects. *Monthly Notices of the Royal Astronomical Society*. 1996;280(3):806–22. <https://doi.org/10.1093/mnras/280.3.806>
3. Devillepoix HAR, Jenniskens P, Bland PA, Sansom EK, Towner MC, Shober P, et al. Taurid Stream #628: A Reservoir of Large Cometary Impactors. *Planet Sci J*. 2021;2(6):223. <https://doi.org/10.3847/psj/ac2250>
4. Kushwaha A, Agrawal VK, Nandi A. AstroSat and MAXI view of Cygnus X-1: Signature of an 'extreme' soft nature. *Monthly Notices of the Royal Astronomical Society*. 2021;507(2):2602–13. <https://doi.org/10.1093/mnras/stab2258>

5. Egal A, Brown P, Wiegert P, Kipreos Y. An observational synthesis of the Taurid meteor complex. *Monthly Notices of the Royal Astronomical Society*. 2022;512:2318–36. DOI: <https://doi.org/10.1093/mnras/stac606>
6. Hodkinson B, Scholtz J. Proper motions of the satellites of M31. *Monthly Notices of the Royal Astronomical Society*. 2019;488(3):3231–7. <https://doi.org/10.1093/mnras/stz1893>
7. Ferrin I, Orofino V. Taurid complex smoking gun: Detection of cometary activity. *Planetary Space Science*. 2021;207:105306. <https://doi.org/10.1016/j.pss.2021.105306>
8. Moore AMT, Kennett JP, LeCompte M, Moore CR, Li Y-Q, Kletetschka GK. Abu Hureyra, Syria, Part 1: Shock-fractured quartz grains support 12,800-year-old cosmic airburst at the Younger Dryas onset. *ScienceOpen*. 2023. <https://doi.org/10.14293/sciopen.2023.41>
9. Moore AMT, Kennett JP, Napier WM, Bunch TE, Weaver JC, LeCompte MA, et al. Abu Hureyra, Syria, Part 2: Additional evidence supporting the catastrophic destruction of this prehistoric village by a cosmic airburst ~12,800 years ago. *ScienceOpen*. 2023. <https://doi.org/10.14293/sciopen.2023.54>
10. Moore AMT, Kennett JP, Napier WM, LeCompte MA, Moore CR, West A. Abu Hureyra, Syria, Part 3: Comet airbursts triggered major climate change 12,800 years ago that initiated the transition to agriculture. *ScienceOpen*. 2023. <https://doi.org/10.14293/sciopen.2023.64>
11. Moore CR, LeCompte MA, Kennett JP, Brooks MJ, Firestone RB, Ivester AH, et al. Platinum, shock-fractured quartz, microspherules, and melt-glass widely distributed in Eastern USA at the Younger Dryas onset (12.8 ka). *Airbursts and Cratering Impacts*. 2024;2(1). <https://doi.org/10.14293/aci.2024.0003>
12. West A, Young M, Costa L, Kennett JP, Moore CR, LeCompte MA, et al. Modeling airbursts by comets, asteroids, and nuclear detonations: shock metamorphism, meltglass, and microspherules. *Airbursts and Cratering Impacts*. 2024;2(1). <https://doi.org/10.14293/aci.2024.0004>
13. Glass BP. Tektites and microtektites: key facts and inferences. *Tectonophysics*. 1990;171(1–4):393–404. [https://doi.org/10.1016/0040-1951\(90\)90112-I](https://doi.org/10.1016/0040-1951(90)90112-I)
14. Glass B, Burns CA. Microkrystites—a new term for impact-produced glassy spherules containing primary crystallites. In: *Lunar and Planetary Science Conference, 18th, Houston, TX, Mar 16–20, 1987, Proceedings*. 1988. 455–8.
15. 74th Annual Meeting of the Meteoritical Society, August 8–12, 2011, London, U.K. *Meteorit & Planetary Sci.* 2011;46(s1). <https://doi.org/10.1111/j.1945-5100.2011.01221.x>
16. Koeberl C. The Geochemistry and Cosmochemistry of Impacts. *Treatise on Geochemistry*. Elsevier. 2007. p. 1–52. <https://doi.org/10.1016/B978-008043751-4/00228-5>
17. Adushkin V, Nemchinov I. *Catastrophic Events Caused by Cosmic Objects*. Springer Netherlands. 2007. <https://doi.org/10.1007/978-1-4020-6452-4>
18. Wakita S, Johnson BC, Denton CA, Davison TM. Jetting during oblique impacts of spherical impactors. *Icarus*. 2021;360:114365. <https://doi.org/10.1016/j.icarus.2021.114365>
19. Farquharson LM, Mann DH, Swanson DK, Jones BM, Buzard RM, Jordan JW. Temporal and spatial variability in coastline response to declining sea-ice in northwest Alaska. *Marine Geology*. 2018;404:71–83. <https://doi.org/10.1016/j.margeo.2018.07.007>
20. Starnberger R, Rodnight H, Spötl C. Chronology of the Last Glacial Maximum in the Salzach palaeoglacier area (Eastern Alps). *J Quaternary Sci*. 2011;26(5):502–10. <https://doi.org/10.1002/jqs.1477>
21. Tsel'movich V, Kurazhkovskii AY, Kazansky AY, Shchetnikov A, Blyakharchuk T, Amelin I. Catastrophic events in the Holocene and their registration in peat deposits. In: *Proceedings of the 11th Intl School and Conference "Problems of Geocosmos"*. St Petersburg, Russia; 2016.
22. Tsel'movich VA, Kurazhkovskii AY, Kazansky AY, Shchetnikov AA, Blyakharchuk TA, Philippov DA. Studying the Dynamics of Cosmic Dust Flux on the Earth's Surface from Peat Deposits. *Izv, Phys Solid Earth*. 2019;55(3):517–27. <https://doi.org/10.1134/S1069351319030108>
23. Tsel'movich VA, editor *Composition and Microscopic Features of Background Cosmic Dust from Peat. Minerals: Structure, Properties, Methods of Investigation: 9th Geoscience Conference for Young Scientists*, Ekaterinburg, Russia, February 5–8, 2018; 2020: Springer.
24. Weiss R, Lynett P, Wünnemann K. The Eltanin impact and its tsunami along the coast of South America: Insights for potential deposits. *Earth and Planetary Science Letters*. 2015;409:175–81. <https://doi.org/10.1016/j.epsl.2014.10.050>
25. Prasad MS, Rudraswami NG, de Araujo AA, Khedekar VD. Characterisation, Sources and Flux of Unmelted Micrometeorites on Earth During the Last ~50,000 Years. *Sci Rep*. 2018;8(1):8887. <https://doi.org/10.1038/s41598-018-27158-x> PMID: 29891909
26. Sungatullin RH, Bakhtin AI, Sungatullina GM, Tsel'movich VA, Glukhov MS, Osin YN, et al. Composition and morphology of metal microparticles in Paleozoic sediments of Caspian depression. *International Journal of Applied Engineering Research*. 2015;10:45372–82. <https://doi.org/10.15372/GiG20170106>
27. Karinskiy AD, Krasnosel'skikh AA. Mathematical and physical modeling to justify a new geophysical method—electrical anisotropy logging. *Russian Geology and Geophysics*. 2018;59(9):1192–200. <https://doi.org/10.1016/j.rgg.2018.08.012>
28. Pfeffer A, Chizmadia L, Macy B, Fischer T, Zolensky M, Warren J. Leonid dust spheres captured during the 2002 storm?. *Earth, Moon, Planets*. 2003;82:505–24.
29. Rojas J, Duprat J, Engrand C, Dartois E, Delauche L, Godard M, et al. The micrometeorite flux at Dome C (Antarctica), monitoring the accretion of extraterrestrial dust on Earth. *Earth Planetary Sci Letters*. 2021;560:116794. <https://doi.org/10.1016/j.epsl.2021.116794>
30. Flynn G. Atmospheric entry heating: A criterion to distinguish between asteroidal and cometary sources of interplanetary dust. *Icarus*. 1989;77:287–310. [https://doi.org/10.1016/0019-1035\(89\)90064-4](https://doi.org/10.1016/0019-1035(89)90064-4)

31. Nesvorný D, Jenniskens P, Levison HF, Bottke WF, Vokrouhlický D, Gounelle M. Cometary origin of the zodiacal cloud and carbonaceous micrometeorites: implications for hot debris disks. *ApJ*. 2010;713(2):816–36. <https://doi.org/10.1088/0004-637x/713/2/816>
32. Engrand C, Lasue J, Wooden DH, Zolensky ME. Chemical and physical properties of cometary dust. 2023. <https://arxiv.org/abs/2305.03417>
33. Festou MC, Keller HU, Weaver HA. Comets II. University of Arizona Press. 2004. <https://doi.org/10.2307/j.ctv1v7zddq5>
34. Yang H, Ishiguro M. Origin of interplanetary dust through optical properties of zodiacal light. *ApJ*. 2015;813(2):87. <https://doi.org/10.1088/0004-637x/813/2/87>
35. Schmidt RA. A survey of data on microscopic extraterrestrial particles: National Aeronautics and Space Administration. 1965.
36. Parkin D, Hunter W. Meteorites and cosmic dust. *Advances in Astronomy and Astrophysics*. 1962;1:105–63. <https://doi.org/10.1016/B978-0-12-003601-2.50007-0>
37. Tselmovich V, Lyukhin A, Sheremet V. Evidence of an impact process on minerals from Carolina Bays craters (eastern coast of the USA). *Experiment GeoSci*. 2018;24(S1):52–4.
38. Sungatullin RK, Sungatullina G, Glukhov M, Tselmovich V, Bakhtin A, Kuzina D. Cosmic dust in the deposits of the Moscovian and Kasimovian stages, Usolka section, Cisuralian foredeep, Russia. 80th Annual Meeting of the Meteoritical Society; 2017.
39. Sungatullin RK, Tselmovich VA, Vafin RA, Sungatullina GM. Geomorphological, geological and mineralogical evidences of impact origin of the rabiga-kul lake basin, Republic of Tatarstan. *Geomorfologiya (Mosk)*. 2016;(1):64–72. <https://doi.org/10.15356/0435-4281-2016-1-64-72>
40. Kireev V. Short course of physical chemistry. Moscow: Khimia. 1978.
41. Volkova MG, Nepomnyashchikh AI, Fedorov AM, Makhlyanova AM, Bryanskii NV. Fluid inclusions in “superquartzites” of the Bural-Sardyk deposit (East Sayan). *Russian Geology and Geophysics*. 2017;58(9):1053–8. <https://doi.org/10.1016/j.rgg.2016.12.007>
42. Wittke JH, Weaver JC, Bunch TE, Kennett JP, Kennett DJ, Moore AMT, et al. Evidence for deposition of 10 million tonnes of impact spherules across four continents 12,800 y ago. *Proc Natl Acad Sci U S A*. 2013;110(23):E2088–97. <https://doi.org/10.1073/pnas.1301760110> PMID: 23690611
43. LeCompte MA, Goodyear AC, Demitroff MN, Batchelor D, Vogel EK, Mooney C, et al. Independent evaluation of conflicting microspherule results from different investigations of the Younger Dryas impact hypothesis. *Proc Natl Acad Sci U S A*. 2012;109(44):E2960–9. <https://doi.org/10.1073/pnas.1208603109> PMID: 22988071
44. Mann ME, Gleick PH. Climate change and California drought in the 21st century. *Proc Natl Acad Sci U S A*. 2015;112(13):3858–9. <https://doi.org/10.1073/pnas.1503667112> PMID: 25829537
45. Pearce C, Özdemir KS, Forchhammer Mathiasen R, Detlef H, Olsen J. The marine reservoir age of Greenland coastal waters. *Geochronology*. 2023;5(2):451–65. <https://doi.org/10.5194/gchron-5-451-2023>
46. McNeely R, Dyke AS, Southon JR. Canadian marine reservoir ages, preliminary data assessment. 2006.
47. Bunch TE, Hermes RE, Moore AM, Kennett DJ, Weaver JC, Wittke JH, et al. Very high-temperature impact melt products as evidence for cosmic airbursts and impacts 12,900 years ago. *Proc Natl Acad Sci*. 2012;109:E1903–E12. DOI: <https://doi.org/10.1073/pnas.1204453109>
48. Bunch TE, LeCompte MA, Adedeji AV, Wittke JH, Burleigh TD, Hermes RE, et al. A Tunguska sized airburst destroyed Tall el-Hammam a Middle Bronze Age city in the Jordan Valley near the Dead Sea. *Sci Rep*. 2021;11(1):18632. <https://doi.org/10.1038/s41598-021-97778-3> PMID: 34545151
49. Moore AMT, Kennett JP, Napier WM, Bunch TE, Weaver JC, LeCompte MA, et al. Abu Hureyra, Syria, Part 2: Additional evidence supporting the catastrophic destruction of this prehistoric village by a cosmic airburst ~12,800 years ago. *Airbursts and Cratering Impacts*. 2023;1(1). <https://doi.org/10.14293/aci.2023.0002>
50. Moore CR, West A, LeCompte MA, Brooks MJ, Daniel IR Jr, Goodyear AC, et al. Widespread platinum anomaly documented at the Younger Dryas onset in North American sedimentary sequences. *Sci Rep*. 2017;7:44031. <https://doi.org/10.1038/srep44031> PMID: 28276513
51. Kyte FT. Unmelted meteoritic debris collected from Eltanin ejecta in Polarstern cores from expedition ANT XII/4. *Deep Sea Research Part II: Topical Stud Oceanography*. 2002;49(6):1063–71. [https://doi.org/10.1016/S0967-0645\(01\)00141-2](https://doi.org/10.1016/S0967-0645(01)00141-2)
52. Kraft ML, Weber PK, Longo ML, Hutcheon ID, Boxer SG. Phase separation of lipid membranes analyzed with high-resolution secondary ion mass spectrometry. *Science*. 2006;313(5795):1948–51. <https://doi.org/10.1126/science.1130279> PMID: 17008528
53. Maier WD, Andreoli MAG, McDonald I, Higgins MD, Boyce AJ, Shukolyukov A, et al. Discovery of a 25-cm asteroid clast in the giant Morokweng impact crater, South Africa. *Nature*. 2006;441(7090):203–6. <https://doi.org/10.1038/nature04751> PMID: 16688173
54. Lambelet M, van de Flierdt T, Crocket K, Rehkämper M, Kreissig K, Coles B, et al. Neodymium isotopic composition and concentration in the western North Atlantic Ocean: Results from the GEOTRACES GA02 section. *Geochimica et Cosmochimica Acta*. 2016;177:1–29. <https://doi.org/10.1016/j.gca.2015.12.019>
55. Dyke AS, Andrews JT, Clark PU, England JH, Miller GH, Shaw J, et al. The Laurentide and Innuitian ice sheets during the Last Glacial Maximum. *Quaternary Sci Rev*. 2002;21(1–3):9–31. [https://doi.org/10.1016/S0277-3791\(01\)00095-6](https://doi.org/10.1016/S0277-3791(01)00095-6)
56. Brouard E, Lajeunesse P. Maximum extent and decay of the Laurentide Ice Sheet in Western Baffin Bay during the Last glacial episode. *Sci Rep*. 2017;7(1):10711. <https://doi.org/10.1038/s41598-017-11010-9> PMID: 28878304
57. Jolly WT. Geology and geochemistry of Huronian rhyolites and low-Ti continental tholeiites from the Thessalon region, central Ontario. *Can J Earth Sci*. 1987;24(7):1360–85. <https://doi.org/10.1139/e87-130>

58. Aksu AE, Hiscott RN. Slides and debris flows on the high-latitude continental slopes of Baffin Bay. *Geol.* 1989;17(10):885. [https://doi.org/10.1130/0091-7613\(1989\)017<0885:sadfot>2.3.co;2](https://doi.org/10.1130/0091-7613(1989)017<0885:sadfot>2.3.co;2)
59. R. N. Hiscott, A. E. Aksu (2). Submarine Debris Flows and Continental Slope Evolution in Front of Quaternary Ice Sheets, Baffin Bay, Canadian Arctic. *Bulletin.* 1994;78. <https://doi.org/10.1306/bdff90dc-1718-11d7-8645000102c1865d>
60. Couette P-O, Lajeunesse P, Ghienne J-F, Dorschel B, Gebhardt C, Hebbeln D, et al. Evidence for an extensive ice shelf in northern Baffin Bay during the Last Glacial Maximum. *Commun Earth Environ.* 2022;3(1). <https://doi.org/10.1038/s43247-022-00559-7>
61. Andrews J, Kirby M, Aksu A, Barber D, Meese D. Late Quaternary detrital carbonate layers in Baffin Bay marine sediments (67°–74° N): Correlation with Heinrich events in the North Atlantic?. *Quaternary Sci Rev.* 1998;17:1125–37. <https://doi.org/10.1016/S0277-379100058-1>
62. Dansgaard W, Johnsen SJ, Clausen HB, Dahl-Jensen D, Gundestrup NS, Hammer CU, et al. Evidence for general instability of past climate from a 250-kyr ice-core record. *Nature.* 1993;364(6434):218–20. <https://doi.org/10.1038/364218a0>
63. Lipar M, Martín-Pérez A, Tičar J, Pavšek M, Gabrovec M, Hrvatin M, et al. Subglacial carbonate deposits as a potential proxy for a glacier's former presence. *The Cryosphere.* 2021;15(1):17–30. <https://doi.org/10.5194/tc-15-17-2021>
64. Moore JC, Yue C, Zhao L, Guo X, Watanabe S, Ji D. Greenland Ice Sheet Response to Stratospheric Aerosol Injection Geoengineering. *Earth's Future.* 2019;7(12):1451–63. <https://doi.org/10.1029/2019ef001393>
65. Murton JB, Bateman MD, Dallimore SR, Teller JT, Yang Z. Identification of Younger Dryas outburst flood path from Lake Agassiz to the Arctic Ocean. *Nature.* 2010;464(7289):740–3. <https://doi.org/10.1038/nature08954> PMID: 20360738
66. Shumilovskikh LS, Arz HW, Wegwerth A, Fleitmann D, Marret F, Nowaczyk N, et al. Vegetation and environmental changes in Northern Anatolia between 134 and 119 ka recorded in Black Sea Sediments. *Quat res.* 2013;80(3):349–60. <https://doi.org/10.1016/j.yqres.2013.07.005>
67. Collins JA, Prange M, Caley T, Gimeno L, Beckmann B, Mulitza S, et al. Rapid termination of the African Humid Period triggered by northern high-latitude cooling. *Nat Commun.* 2017;8(1):1372. <https://doi.org/10.1038/s41467-017-01454-y> PMID: 29118318
68. Keigwin L, Klotzko S, Zhao N, Reilly B, Giosan L, Driscoll N. Deglacial floods in the Beaufort Sea preceded Younger Dryas cooling. *Nat Geosci.* 2018;11:599–604. <https://doi.org/10.1038/s41561-018-0186-7>
69. Kiefer T, Sarnthein M, Erlenkeuser H, Grootes PM, Roberts AP. North Pacific response to millennial-scale changes in ocean circulation over the last 60 kyr. *Paleoceanography.* 2001;16(2):179–89. <https://doi.org/10.1029/2000pa000545>
70. Clark PU, Dyke AS, Shakun JD, Carlson AE, Clark J, Wohlfarth B, et al. The Last Glacial Maximum. *Science.* 2009;325(5941):710–4. <https://doi.org/10.1126/science.1172873>
71. Baldini JUL, Brown RJ, Mawdsley N. Evaluating the link between the sulfur-rich Laacher See volcanic eruption and the Younger Dryas climate anomaly. *Clim Past.* 2018;14(7):969–90. <https://doi.org/10.5194/cp-14-969-2018>
72. Warken SF, Schmitt AK, Scholz D, Hertwig A, Weber M, Mertz-Kraus R, et al. Discovery of Laacher See eruption in speleothem record synchronizes Greenland and central European Late Glacial climate change. *Sci Adv.* 2025;11(3):eadt4057. <https://doi.org/10.1126/sciadv.adt4057> PMID: 39813351
73. Deringer W. Compound Interest Corrected: The Imaginative Mathematics of the Financial Future in Early Modern England. *Osiris.* 2018;33(1):109–29. <https://doi.org/10.1086/699236>
74. Kennett J, Kennett D, LeCompte M, West A. Potential consequences of the YDB cosmic impact at 12.8 ka. In: Goodyear AC, Moore AM, editors. *Early human life on the southeastern coastal plain.* Gainesville, FL: University Press of Florida. 2018. p. 175–92. <https://doi.org/10.1353/book16062.12>
75. Wolbach WS, Ballard JP, Mayewski PA, Adedeji V, Bunch TE, Firestone RB, et al. Extraordinary Biomass-Burning Episode and Impact Winter Triggered by the Younger Dryas Cosmic Impact ~12,800 Years Ago. 1. Ice Cores and Glaciers. *The Journal of Geology.* 2018;126(2):165–84. <https://doi.org/10.1086/695703>
76. Ashley MV, Backs JR, Kindsvater L, Abraham ST. Genetic Variation and Structure in an Endemic Island Oak, *Quercus tomentella*, and Mainland Canyon Oak, *Quercus chrysolepis*. *International J Plant Sci.* 2018;179(2):151–61. <https://doi.org/10.1086/696023>
77. Powell JL. Premature rejection in science: The case of the Younger Dryas Impact Hypothesis. *Sci Prog.* 2022;105(1):368504211064272. <https://doi.org/10.1177/00368504211064272> PMID: 34986034
78. Hwang J, Kim BS, Jang SY, Lim JG, You D-J, Jung HS, et al. Structural insights into the regulation of sialic acid catabolism by the *Vibrio vulnificus* transcriptional repressor NanR. *Proc Natl Acad Sci U S A.* 2013;110(30):E2829–37. <https://doi.org/10.1073/pnas.1302859110> PMID: 23832782
79. Moore CR, Brooks MJ, Goodyear AC, Ferguson TA, Perrotti AG, Mitra S, et al. Sediment Cores from White Pond, South Carolina, contain a Platinum Anomaly, Pyrogenic Carbon Peak, and Coprophilous Spore Decline at 12.8 ka. *Sci Rep.* 2019;9(1):15121. <https://doi.org/10.1038/s41598-019-51552-8> PMID: 31641142
80. Moore AMT, Kennett JP, Napier WM, Bunch TE, Weaver JC, LeCompte M, et al. Evidence of Cosmic Impact at Abu Hureyra, Syria at the Younger Dryas Onset (~12.8 ka): High-temperature melting at >2200 °C. *Sci Rep.* 2020;10(1):4185. <https://doi.org/10.1038/s41598-020-60867-w> PMID: 32144395
81. Andronikov A, Subetto D, Lauretta D, Andronikova I, Drosenko D, Kuznetsov D. In search for fingerprints of an extraterrestrial event: Trace element characteristics of sediments from the Lake Medvedevskoye. *Dokl Earth Sci.* 2014;457:819–23. <https://doi.org/10.1134/S1028334X1407004X>



82. Winkler S, Matthews JA, Mourne RW, Wilson P. Schmidt-hammer exposure ages from periglacial patterned ground (sorted circles) in jotunheimen, norway, and their interpretative problems. *Geografiska Annaler: Series A, Physical Geography*. 2016;98(3):265–85. <https://doi.org/10.1111/geoa.12134>
83. Maslin MA, Brierley CM. The role of orbital forcing in the Early Middle Pleistocene Transition. *Quaternary International*. 2015;389:47–55. <https://doi.org/10.1016/j.quaint.2015.01.047>
84. Kurbatov AV, Mayewski PA, Steffensen JP, West A, Kennett DJ, Kennett JP. Discovery of a nanodiamond-rich layer in the Greenland ice sheet. *J Glaciol*. 2010;56:747–57. <https://doi.org/10.3189/002214310793889985>
85. Hermes RE, Wenk H-R, Kennett JP, Bunch TE, Moore CR, LeCompte MA, et al. Microstructures in Shocked Quartz: Linking Nuclear Airbursts and Meteorite Impacts. MDPI AG. 2023. <https://doi.org/10.20944/preprints202308.0221.v1>
86. Moore CR, Brooks MJ, Dunbar JS, Hemmings CA, Langworthy KA, West A, et al. Platinum and microspherule peaks as chronostratigraphic markers for onset of the Younger Dryas at Wakulla Springs, Florida. *Sci Rep*. 2023;13(1):22738. <https://doi.org/10.1038/s41598-023-50074-8> PMID: [38123649](https://pubmed.ncbi.nlm.nih.gov/38123649/)
87. Kletetschka G, Vondrák D, Hruha J, Prochazka V, Nabelek L, Svitavská-Svobodová H, et al. Cosmic-Impact Event in Lake Sediments from Central Europe Postdates the Laacher See Eruption and Marks Onset of the Younger Dryas. *J Geol*. 2018;126(6):561–75. <https://doi.org/10.1086/699869>
88. Ryan JJ, Butrous G, Maron BA. The heterogeneity of clinical practice patterns among an international cohort of pulmonary arterial hypertension experts. *Pulm Circ*. 2014;4(3):441–51. <https://doi.org/10.1086/677357> PMID: [25621157](https://pubmed.ncbi.nlm.nih.gov/25621157/)
89. Kennett DJ, Kennett JP, West A, Mercer C, Hee SSQ, Bement L, et al. Nanodiamonds in the Younger Dryas boundary sediment layer. *Science*. 2009;323(5910):94. <https://doi.org/10.1126/science.1162819> PMID: [19119227](https://pubmed.ncbi.nlm.nih.gov/19119227/)
90. Kennett DJ, Kennett JP, West A, West GJ, Bunch TE, Culleton BJ, et al. Shock-synthesized hexagonal diamonds in Younger Dryas boundary sediments. *Proc Natl Acad Sci U S A*. 2009;106(31):12623–8. <https://doi.org/10.1073/pnas.0906374106> PMID: [19620728](https://pubmed.ncbi.nlm.nih.gov/19620728/)
91. Israde-Alcántara I, Bischoff JL, Domínguez-Vázquez G, Li H-C, DeCarli PS, Bunch TE, et al. Evidence from central Mexico supporting the Younger Dryas extraterrestrial impact hypothesis. *Proc Natl Acad Sci U S A*. 2012;109(13):E738–47. <https://doi.org/10.1073/pnas.1110614109> PMID: [22392980](https://pubmed.ncbi.nlm.nih.gov/22392980/)
92. Pino M, Abarzúa AM, Astorga G, Martel-Cea A, Cossio-Montecinos N, Navarro RX, et al. Sedimentary record from Patagonia, southern Chile supports cosmic-impact triggering of biomass burning, climate change, and megafaunal extinctions at 12.8 ka. *Sci Rep*. 2019;9(1):4413. <https://doi.org/10.1038/s41598-018-38089-y> PMID: [30867437](https://pubmed.ncbi.nlm.nih.gov/30867437/)
93. Tamura T, Horaguchi K, Saito Y, Nguyen VL, Tateishi M, Ta TKO, et al. Monsoon-influenced variations in morphology and sediment of a mesotidal beach on the Mekong River delta coast. *Geomorphology*. 2010;116(1–2):11–23. <https://doi.org/10.1016/j.geomorph.2009.10.003>
94. Thackeray JF, Scott L. The Younger Dryas in the Wonderkrater sequence, South Africa?. *Annals of the Transvaal Museum*. 2006;43:111–2. <https://doi.org/10.1080/00278864.2006.9486614>
95. Ballard JP, Bijkerk AK. Quartz melt structures in European coversands may support Younger Dryas extraterrestrial impact hypothesis. *UT Geography Research Symposium 2014 "Mapping outside the Lines: Geography as a Nexus for Interdisciplinary and collaborative Research"*; Knoxville, Tennessee, 2014.
96. Tian H, Schryvers D, Claeys P. Nanodiamonds do not provide unique evidence for a Younger Dryas impact. *Proc Natl Acad Sci U S A*. 2011;108(1):40–4. <https://doi.org/10.1073/pnas.1007695108> PMID: [21173270](https://pubmed.ncbi.nlm.nih.gov/21173270/)
97. Firestone RB, West GJ, Revay Z, Hagstrum J, Belgia T, Que Hee SS. *J Siberian Fed Univ*. 2010;1:30–62.
98. Boslough M, Nicoll K, Holliday V, Daulton T, Meltzer D, Pinter N. Arguments and evidence against a Younger Dryas impact event. In: Giosan L, Fuller D, Nicoll K, Flad R, Clift P, editors. *Climates, landscapes, civilizations*. Washington, DC: Am Geophys Union. 2012. p. 13–26. <https://doi.org/10.1029/2012GM001239>
99. Holliday V, Surovell T, Johnson E. A Blind Test of the Younger Dryas Impact Hypothesis. *PLoS One*. 2016;11(7):e0155470. <https://doi.org/10.1371/journal.pone.0155470> PMID: [27391147](https://pubmed.ncbi.nlm.nih.gov/27391147/)
100. Bourne AJ, Cook E, Abbott PM, Seierstad IK, Steffensen JP, Svensson A, et al. A tephra lattice for Greenland and a reconstruction of volcanic events spanning 25–45 ka b2k. *Quaternary Sci Rev*. 2015;118:122–41. <https://doi.org/10.1016/j.quascirev.2014.07.017>
101. Meltzer DJ, Holliday VT. Would North American Paleoindians have Noticed Younger Dryas Age Climate Changes?. *J World Prehist*. 2010;23(1):1–41. <https://doi.org/10.1007/s10963-009-9032-4>
102. Meltzer DJ, Holliday VT, Cannon MD, Miller DS. Chronological evidence fails to support claim of an isochronous widespread layer of cosmic impact indicators dated to 12,800 years ago. *Proc Natl Acad Sci U S A*. 2014;111(21):E2162–71. <https://doi.org/10.1073/pnas.1401150111> PMID: [24821789](https://pubmed.ncbi.nlm.nih.gov/24821789/)
103. Paquay FS, Goderis S, Ravizza G, Vanhaeck F, Boyd M, Surovell TA, et al. Absence of geochemical evidence for an impact event at the Bølling-Allerød/Younger Dryas transition. *Proc Natl Acad Sci U S A*. 2009;106(51):21505–10. <https://doi.org/10.1073/pnas.0908874106> PMID: [20007789](https://pubmed.ncbi.nlm.nih.gov/20007789/)
104. Giannini E, Lattanzi R, Nicotra A, Campese AF, Grazioli P, Screpanti I, et al. The chemokine Bv8/prokineticin 2 is up-regulated in inflammatory granulocytes and modulates inflammatory pain. *Proc Natl Acad Sci U S A*. 2009;106(34):14646–51. <https://doi.org/10.1073/pnas.0903720106> PMID: [19667192](https://pubmed.ncbi.nlm.nih.gov/19667192/)

105. Lo S-C, Pripuzova N, Li B, Komaroff AL, Hung G-C, Wang R, et al. Detection of MLV-related virus gene sequences in blood of patients with chronic fatigue syndrome and healthy blood donors. *Proc Natl Acad Sci U S A*. 2010;107(36):15874–9. <https://doi.org/10.1073/pnas.1006901107> PMID: [20798047](https://pubmed.ncbi.nlm.nih.gov/20798047/)
106. Roberts DL, Matthews T, Herries AIR, Boulter C, Scott L, Dondo C, et al. Regional and global context of the Late Cenozoic Langebaanweg (LBW) palaeontological site: West Coast of South Africa. *Earth-Sci Rev*. 2011;106(3–4):191–214. <https://doi.org/10.1016/j.earscirev.2011.02.002>
107. Borella J, Quigley M, Sohbati R, Almond P, Gravley DM, Murray A. Chronology and processes of late Quaternary hillslope sedimentation in the eastern South Island, New Zealand. *J Quaternary Sci*. 2016;31(7):691–712. <https://doi.org/10.1002/jqs.2905>
108. Scott AC, Pinter N, Collinson ME, Hardiman M, Anderson RS, Brain AP. Fungus, not comet or catastrophe, accounts for carbonaceous spherules in the Younger Dryas “impact layer”. *Geophys Res Lett*. 2010;37:1–5. <https://doi.org/10.1029/2010GL044624>
109. Holliday VT, Daulton TL, Bartlein PJ, Boslough MB, Breslawski RP, Fisher AE, et al. Comprehensive refutation of the Younger Dryas Impact Hypothesis (YDIH). *Earth-Sci Rev*. 2023;247:104502. <https://doi.org/10.1016/j.earscirev.2023.104502>
110. Pigati JS, Latorre C, Rech JA, Betancourt JL, Martínez KE, Budahn JR. Accumulation of impact markers in desert wetlands and implications for the Younger Dryas impact hypothesis. *Proc Natl Acad Sci U S A*. 2012;109(19):7208–12. <https://doi.org/10.1073/pnas.1200296109> PMID: [22529347](https://pubmed.ncbi.nlm.nih.gov/22529347/)
111. Sweatman MB, Powell JL, West A. Rebuttal of Holliday *et al.*'s Comprehensive Gish Gallop of the Younger Dryas Impact Hypothesis. *Airbursts Cratering Impacts*. 2024;2:20240007.
112. Sweatman MB. The Younger Dryas impact hypothesis: Review of the impact evidence. *Earth-Science Reviews*. 2021;218:103677. <https://doi.org/10.1016/j.earscirev.2021.103677>
113. Rudnick RL, Gao S. Composition of the continental crust. In: Rudnick RL, editor. *Treatise on geochemistry*. Elsevier. 2003. p. 1–64. <https://doi.org/10.1016/B0-08-043751-6/03018-6>
114. Koeberl C. The geochemistry and cosmochemistry of impacts. *Planets, asteroids, comets and the solar system*. 2014. p. 73–118.
115. Van Ginneken M, Goderis S, Artemieva N, Debaille V, Decrée S, Harvey RP, et al. A large meteoritic event over Antarctica ca. 430 ka ago inferred from chondritic spherules from the Sør Rondane Mountains. *Sci Adv*. 2021;7(14):eabc1008. <https://doi.org/10.1126/sciadv.abc1008> PMID: [33789890](https://pubmed.ncbi.nlm.nih.gov/33789890/)
116. van Ginneken M, Harvey RP, Goderis S, Artemieva N, Boslough M, Maeda R, et al. The identification of airbursts in the past: Insights from the BIT-58 layer. *Earth and Planetary Sci Letters*. 2024;627:118562. <https://doi.org/10.1016/j.epsl.2023.118562>
117. Taylor S. Micrometeorites from the South Pole water well. *Digital media*. 2002.
118. Philpot CW. Temperatures in a large natural-fuel fire. 1965.
119. Walton CC, Sullivan JT, Rao CRN, Weinreb MP. Corrections for detector nonlinearities and calibration inconsistencies of the infrared channels of the advanced very high resolution radiometer. *J Geophys Res*. 1998;103(C2):3323–37. <https://doi.org/10.1029/97jc02018>
120. Birks HH, Gulliksen S, Hafliðason H, Mangerud J, Possnert G. New radiocarbon dates for the vedde ash and the saksunarvatn ash from Western Norway. *Quat res*. 1996;45(2):119–27. <https://doi.org/10.1006/qres.1996.0014>
121. Napier WM. The influx of comets and their debris. *Accretion of Extraterrestrial Matter Throughout Earth's History*. Springer US. 2001. p. 51–74. [https://doi.org/10.1007/978-1-4419-8694-8\\_4](https://doi.org/10.1007/978-1-4419-8694-8_4)
122. Hewett PC, Wild V. Improved redshifts for SDSS quasar spectra. *Monthly Notices of the Royal Astronomical Society*. 2010;no-. <https://doi.org/10.1111/j.1365-2966.2010.16648.x>
123. Napier WM. Comets, Catastrophes and Earth's History. *J Cosmol*. 2009;2:344–55.
124. Fuller J, Lai D. Dynamical tides in compact white dwarf binaries: influence of rotation. *Monthly Notices Royal Astronomical Soc*. 2014;444(4):3488–500. <https://doi.org/10.1093/mnras/stu1698>
125. Guzik P, Drahus M. Gaseous atomic nickel in the coma of interstellar comet 2I/Borisov. *Nature*. 2021;593(7859):375–8. <https://doi.org/10.1038/s41586-021-03485-4> PMID: [34012084](https://pubmed.ncbi.nlm.nih.gov/34012084/)
126. Messenger SR, Walker RM, editors. *Stratospheric Collection of Dust from Comet 73P/Schwassmann-Wachmann 3*. 42nd Lunar and planetary Science Conference; 2011.
127. Pechersky DM, Kuzina DM, Markov GP, Tsel'movich VA. Native iron in the Earth and space. *Izv, Phys Solid Earth*. 2017;53(5):658–76. <https://doi.org/10.1134/s1069351317030089>
128. Pechersky DM, Kuzina DM, Nurgaliev DK, Tsel'movich VA. The common nature of native iron in terrestrial rocks and meteorites: Microprobe and thermomagnetic data. *Izv, Phys Solid Earth*. 2015;51(5):748–63. <https://doi.org/10.1134/s1069351315050109>
129. Pechersky DM, Markov GP, Tsel'movich VA. Pure iron and other magnetic minerals in meteorites. *Sol Syst Res*. 2015;49(1):61–71. <https://doi.org/10.1134/s0038094614060070>
130. Pechersky DM, Markov GP, Tsel'movich VA, Sharonova ZV. Extraterrestrial magnetic minerals. *Izv, Phys Solid Earth*. 2012;48(7–8):653–69. <https://doi.org/10.1134/s1069351312070051>
131. Manfroid J, Hutsemékers D, Jehin E. Iron and nickel atoms in cometary atmospheres even far from the Sun. *Nature*. 2021;593(7859):372–4. <https://doi.org/10.1038/s41586-021-03435-0> PMID: [34012081](https://pubmed.ncbi.nlm.nih.gov/34012081/)

132. Agarwal DK, Palayil JK. Recovery of hydrothermal wustite-magnetite spherules from the Central Indian Ridge, Indian Ocean. *Sci Rep*. 2022;12(1):6811. <https://doi.org/10.1038/s41598-022-10756-1> PMID: 35474088
133. Boslough M, Schultz P, Harris R, editors. Hypervelocity airburst shower formation of the Pica glass. 13 th Planetary Crater Consortium Meeting; 2022.
134. Simonson BM, Glass BP. Spherule layers—records of ancient impacts. *Annu Rev Earth Planet Sci*. 2004;32(1):329–61. <https://doi.org/10.1146/annurev.earth.32.101802.120458>
135. Kohout T, Kletetschka G, Elbra T, Adachi T, Mikula V, Pesonen LJ, et al. Physical properties of meteorites—Applications in space missions to asteroids. *Meteorit & Planetary Scien*. 2008;43(6):1009–20. <https://doi.org/10.1111/j.1945-5100.2008.tb00689.x>
136. Glass BP, Simonson BM. *Distal Impact Ejecta Layers*. Springer. 2013. p. 245–320. [https://doi.org/10.1007/978-3-642-32947-9\\_12](https://doi.org/10.1007/978-3-642-32947-9_12)
137. Hendrickson R, Kazarians G, Yearicks S, Guan L, Seuylemezian A, Matthias LL, et al. Planetary Protection Implementation of the InSight Mission Launch Vehicle and Associated Ground Support Hardware. *Astrobiology*. 2020;20(10):1158–67. <https://doi.org/10.1089/ast.2019.2099> PMID: 32907354
138. Alexander C, Bowden R, Howard K. A mutli-technique search for the most primitive CO chondrites. 45 th Annual Lunar and Planetary Science Conference; 2014.
139. Williams HM, Wood BJ, Wade J, Frost DJ, Tuff J. Isotopic evidence for internal oxidation of the Earth's mantle during accretion. *Earth and Planetary Science Letters*. 2012;321–322:54–63. <https://doi.org/10.1016/j.epsl.2011.12.030>
140. Mahaney WC, West Ilen, Milan A, Krinsley DH, Somelar P, Schwartz S, et al. Cosmic Airburst on Developing Allerød Substrates (Soils) in the Western Alps, Mt. Viso Area. *Studia Quaternaria*. 2018;35(1):3–23. <https://doi.org/10.2478/squa-2018-0001>
141. LeCompte MA, West A, Adededi A, Demitroff M, Witwer T, Langenburg RA. The Bowser Road Mastodon and the Younger Dryas Impact Hypothesis, Appendix 3. In: Gramly R, editor. *The Archaeological Recovery of the Bowser Road Mastodon*, Orange County NY. Santa Clara, CA: Persimmon Press. 2017.
142. Bluhm LE, Surovell TA. Validation of a global model of taphonomic bias using geologic radiocarbon ages— ERRATUM. *Quat res*. 2018;91(1):451–451. <https://doi.org/10.1017/qua.2018.121>
143. Wu Y, Sharma M, LeCompte MA, Demitroff MN, Landis JD. Origin and provenance of spherules and magnetic grains at the Younger Dryas boundary. *Proc Natl Acad Sci U S A*. 2013;110(38):E3557–66. <https://doi.org/10.1073/pnas.1304059110> PMID: 24009337
144. Andronikov A, Lauretta D, Andronikova I, Maxwell R, editors. On the possibility of a late Pleistocene extraterrestrial impact: LA-ICP-MS analysis of the black mat and Usselo horizon samples. 74th Annual Meteoritical Society Meeting; 2011; London.
145. Andronikov AV, Andronikova IE. Sediments from around the Lower Younger Dryas Boundary (USA): Implications from LA-ICP-Analysis. *Geogr Ann A*. 2016;98:221–36. <https://doi.org/10.1111/geoa.12127>
146. Andronikov AV, Andronikova IE, Loehn CW, Lafuente B, Ballenger JA, Crawford GT, et al. Implications from chemical, structural and mineralogical studies of magnetic microspherules from around the lower Younger Dryas Boundary. *Geogr Ann A*. 2016;98:39–59. <https://doi.org/10.1111/geoa.12119>
147. Mahaney W, Krinsley DH, Milner MW, Fischer R, Langworthy K. Did the Black-Mat Impact/Airburst Reach the Antarctic? Evidence from New Mountain Near the Taylor Glacier in the Dry Valley Mountains. *J Geol*. 2018;126:285–305. <https://doi.org/10.1086/696567>
148. Mahaney WC, Krinsley D, Kalm V. Evidence for a cosmogenic origin of fired glaciofluvial beds in the northwestern Andes: Correlation with experimentally heated quartz and feldspar. *Sediment Geol*. 2010;231:31–40. <https://doi.org/10.1016/j.sedgeo.2010.07.003>
149. Holliday VT, Daulton TL, Bartlein PJ, Boslough MB, Breslawski RP, Fisher AE, et al. Comprehensive refutation of the Younger Dryas Impact Hypothesis (YDIH). *Earth-Science Reviews*. 2023;247:104502. <https://doi.org/10.1016/j.earscirev.2023.104502>
150. Kennett JP, LeCompte MA, Moore CR, Kletetschka G, Johnson JR, Wolbach WS. Shock-fractured quartz at Younger Dryas onset (12.8 ka) supports cosmic airbursts/impacts contributing to North American megafaunal extinctions and Clovis collapse. *Sci Rep*. 2024. <https://doi.org/10.1038/s41598-024-53273-5>
151. Lee C-TA, Wasserburg GJ, Kyte FT. Platinum-group elements (PGE) and rhenium in marine sediments across the Cretaceous–Tertiary boundary: constraints on Re-PGE transport in the marine environment. *Geochimica et Cosmochimica Acta*. 2003;67(4):655–70. [https://doi.org/10.1016/s0016-7037\(02\)01135-3](https://doi.org/10.1016/s0016-7037(02)01135-3)
152. Brown PG, Hildebrand AR, Zolensky ME. Tagish Lake. *Meteorit & Planetary Scien*. 2002;37(5):619–21. <https://doi.org/10.1111/j.1945-5100.2002.tb00843.x>
153. Alvarez LW, Alvarez W, Asaro F, Michel HV. Extraterrestrial cause for the cretaceous-tertiary extinction. *Science*. 1980;208(4448):1095–108. <https://doi.org/10.1126/science.208.4448.1095> PMID: 17783054
154. French BM, Koeberl C. The convincing identification of terrestrial meteorite impact structures: What works, what doesn't, and why. *Earth-Science Reviews*. 2010;98(1–2):123–70. <https://doi.org/10.1016/j.earscirev.2009.10.009>
155. Hough RM, Gilmour I, Pillinger CT. Carbon isotope study of impact diamonds in Chicxulub ejecta at Cretaceous-Tertiary boundary sites in Mexico and the Western Interior of the United States. In: Dressler BO, Sharpton VL, editors. *Large Meteorite Impacts and Planetary Evolution II*, Special Paper. 1999. p. 215–22.

156. Schmitt R, Lapke C, Lingemann C, Siebenschock M, Stöffler D. Distribution and origin of impact diamonds in the Ries crater, Germany. *Geological Society of America*. 2005.
157. Adatte T, Keller G, Stüben D, Harting M, Kramar U, Stinnesbeck W, et al. Late Maastrichtian and K/T paleoenvironment of the eastern Tethys (Israel): mineralogy, trace and platinum group elements, biostratigraphy and faunal turnovers. *Bull Soc Géol France*. 2005;176(1):37–55. <https://doi.org/10.2113/176.1.37>
158. Wolbach WS, Gilmour I, Anders E. Major wildfires at the Cretaceous/Tertiary boundary. *Geological Society of America Special Paper*. 1990. p. 391–400.
159. Wolbach WS, Gilmour I, Anders E, Orth CJ, Brooks RR. Global fire at the Cretaceous–Tertiary boundary. *Nature*. 1988;334(6184):665–9. <https://doi.org/10.1038/334665a0>
160. Masse J-P, Morycowa E, Fenerci-Masse M. Valanginian-Hauterivian scleractinian coral communities from the Marseille region (SE France). *Cretaceous Research*. 2009;30(1):178–92. <https://doi.org/10.1016/j.cretres.2008.07.002>
161. Alldredge AL, Gotschalk C. In situ settling behavior of marine snow1. *Limnol Oceanography*. 1988;33(3):339–51. <https://doi.org/10.4319/lo.1988.33.3.0339>
162. Mahaney WC, Kalm V, Krinsley DH, Tricart P, Schwartz S, Dohm J, et al. Evidence from the northwestern Venezuelan Andes for extraterrestrial impact: The black mat enigma. *Geomorphology*. 2010;116(1–2):48–57. <https://doi.org/10.1016/j.geomorph.2009.10.007>
163. Sweatman MB, Tsikritsis D. Decoding Göbekli Tepe with archaeoastronomy: what does the fox say?. *Mediterranean Archaeology & Archaeometry*. 2017;17:75–98. <https://doi.org/10.5281/zenodo.345379>
164. Moore A, Kennett D. Cosmic impact, the Younger Dryas, Abu Hureyra, and the inception of agriculture in Western Asia. *Eurasian Prehistory*. 2013;10(1–2):57–66. <https://doi.org/10.1016/j.eurpre.2013.01.001>
165. Goodyear AC, Moore CR. Early Human Life on the Southeastern Coastal Plain. University Press of Florida. 2018. <https://doi.org/10.5744/florida/9781683400349.001.0001> <http://dx.doi.org/10.5744/florida/9781683400349.001.0001>
166. Moore CR, Brooks MJ, Hemmings CA, editors. *Geoarchaeological Investigations at Wakulla Springs, Florida*. In: *Southeastern Archaeological Conference, Proceedings of the 76th Annual Meeting*. Jackson, Mississippi, 2019.
167. West A, Bunch T, Lecompte MA, Adediji V, Moore CR, Wolbach WS. Evidence from Pilauco, Chile Suggests a Catastrophic Cosmic Impact Occurred Near the Site ~12,800 Years Ago. *The Latin American Studies Book Series*. Springer International Publishing. 2019. p. 249–70. [https://doi.org/10.1007/978-3-030-23918-3\\_15](https://doi.org/10.1007/978-3-030-23918-3_15)
168. Boslough M. Sodom meteor strike claims should be taken with a pillar of salt. *Skeptical Inquirer*. 2022;46:10–4.
169. Boslough M. In: 2015.
170. Ownsworth E, Selby D, Lloyd J, Knutz P, Szidat S, Andrews J, et al. Tracking sediment delivery to central Baffin Bay during the past 40 kys: Insights from a multiproxy approach and new age model. *Quaternary Science Reviews*. 2023;308:108082. <https://doi.org/10.1016/j.quascirev.2023.108082>
171. Hoyle F, Wickramasinghe C. Comets, ice ages, and ecological catastrophes. *Astrophys Space Sci*. 1978;53(2):523–6. <https://doi.org/10.1007/bf00645040>
172. Turco RP, Toon OB, Ackerman TP, Pollack JB, Sagan C. Climate and smoke: an appraisal of nuclear winter. *Science*. 1990;247:166–76. <https://doi.org/10.1126/science.11538069> PMID: 11538069
173. Pope KO, Baines KH, Ocampo AC, Ivanov BA. Impact winter and the Cretaceous/Tertiary extinctions: results of a Chicxulub asteroid impact model. *Earth Planet Sci Lett*. 1994;128:719–25. [https://doi.org/10.1016/0012-821x\(94\)90186-4](https://doi.org/10.1016/0012-821x(94)90186-4) PMID: 11539442
174. Ukidve A, Zhao Z, Fehnel A, Krishnan V, Pan DC, Gao Y, et al. Erythrocyte-driven immunization via biomimicry of their natural antigen-presenting function. *Proc Natl Acad Sci U S A*. 2020;117(30):17727–36. <https://doi.org/10.1073/pnas.2002880117> PMID: 32665441
175. VanTongeren JA, Zirakparvar NA, Mathez EA. Hf isotopic evidence for a cogenetic magma source for the Bushveld Complex and associated felsic magmas. *Lithos*. 2016;248–251:469–77. <https://doi.org/10.1016/j.lithos.2016.02.007>
176. Huang S, Humayun M, Frey FA. Iron/manganese ratio and manganese content in shield lavas from Ko'olau Volcano, Hawai'i. *Geochimica et Cosmochimica Acta*. 2007;71(18):4557–69. <https://doi.org/10.1016/j.gca.2007.07.013>
177. Miller M, Franchi I, Sexton A, Pillinger C. High precision delta(17)O isotope measurements of oxygen from silicates and other oxides: method and applications. *Rapid Commun Mass Spectrom*. 1999;13(13):1211–7. [https://doi.org/10.1002/\(SICI\)1097-0231\(19990715\)13:13<1211::AID-RC-M576>3.0.CO;2-M](https://doi.org/10.1002/(SICI)1097-0231(19990715)13:13<1211::AID-RC-M576>3.0.CO;2-M) PMID: 10407300
178. Greenwood RC, Burbine TH, Miller MF, Franchi IanA. Melting and differentiation of early-formed asteroids: The perspective from high precision oxygen isotope studies. *Geochemistry*. 2017;77(1):1–43. <https://doi.org/10.1016/j.chemer.2016.09.005>
179. Miller MF. Isotopic fractionation and the quantification of 17 O anomalies in the oxygen three-isotope system. *Geochimica et Cosmochimica Acta*. 2002;66(11):1881–9. [https://doi.org/10.1016/s0016-7037\(02\)00832-3](https://doi.org/10.1016/s0016-7037(02)00832-3)
180. Alam M, Alshehri T, Wang J, Singerling SA, Alpers CN, Baalousha M. Identification and quantification of Cr, Cu, and As incidental nanomaterials derived from CCA-treated wood in wildland-urban interface fire ashes. *J Hazard Mater*. 2023;445:130608. <https://doi.org/10.1016/j.jhazmat.2022.130608> PMID: 37056018



181. Baalousha M, Wang J, Erfani M, Goharian E. Elemental fingerprints in natural nanomaterials determined using SP-ICP-TOF-MS and clustering analysis. *Sci Total Environ*. 2021;792:148426. <https://doi.org/10.1016/j.scitotenv.2021.148426> PMID: [34157530](#)
182. Wang J, Nabi MM, Erfani M, Goharian E, Baalousha M. Identification and quantification of anthropogenic nanomaterials in urban rain and runoff using single particle-inductively coupled plasma-time of flight-mass spectrometry. *Environ Sci: Nano*. 2022;9(2):714–29. <https://doi.org/10.1039/d1en00850a>
183. Pace HE, Rogers NJ, Jarolimek C, Coleman VA, Higgins CP, Ranville JF. Determining transport efficiency for the purpose of counting and sizing nanoparticles via single particle inductively coupled plasma mass spectrometry. *Anal Chem*. 2011;83(24):9361–9. <https://doi.org/10.1021/ac201952t> PMID: [22074486](#)
184. Hou T, Xu N, Wang W, Ge L, Li F. Truly Immobilization-Free Diffusivity-Mediated Photoelectrochemical Biosensing Strategy for Facile and Highly Sensitive MicroRNA Assay. *Anal Chem*. 2018;90(15):9591–7. <https://doi.org/10.1021/acs.analchem.8b02523> PMID: [29991254](#)
185. McCormick BT, Edmonds M, Mather TA, Campion R, Hayer CSL, Thomas HE, et al. Volcano monitoring applications of the Ozone Monitoring Instrument. *SP*. 2013;380(1):259–91. <https://doi.org/10.1144/sp380.11>
186. Grainger RG, Lambert A, Rodgers CD, Taylor FW, Deshler T. Stratospheric aerosol effective radius, surface area and volume estimated from infrared measurements. *J Geophys Res*. 1995;100(D8):16507–18. <https://doi.org/10.1029/95jd00988>
187. Analyzing A Planet That Crosses a Small Comet's Fragment Chain. *Eart & Envi Scie Res & Rev*. 2024;7(2):01–14. <https://doi.org/10.33140/eesrr.07.02.03>
